# Supplementary material for: Data-mining of potential antitubercular activities from molecular ingredients of traditional Chinese medicines
Source: PeerJ. 2014 Jul 17;2:e476. doi: 10.7717/peerj.476 (PMC4106188; doi:10.7717/peerj.476)
Supplement: Table S1 — Supplementary Table 1 shows the Chinese molecules used in the present study with their smiles. [file peerj-02-476-s001.xlsx]

## Sheet: Sheet1
CC1COC2(CC1C(Cl)Cl)C(C3C(O2)CC4C3(CCC5C4CC=C6C5([C@@H](C[C@@H](C6)O)O)C)C)C
CC(C)C1=CC(=O)C2=C(C1=O)CCC3[C@@]2(CCCC3(C)C)C
COC1=C(C=C(C=C1)C2=CC(=O)C3=CC(=C(C=C3O2)O)OC)O
C[NH2+]C(CC1=CNC2=CC=CC=C21)C(=O)[O-]
CC1(C2CCC3(C(C2(CCC1O)C)CC=C4C3(CCC5(C4CC(CC5O)(C)CO)C)C)C)C
C[C@]12CC[C@@H]([C@](C1CC[C@@]3([C@@H]2CC=C4[C@]3(CC[C@@]5([C@H]4C[C@](C[C@H]5O)(C)CO)C)C)C)(C)CO)O
C.C.C.C.C.C.C.C.C.C.C.C.C.C.C.C.C.C.C.C.C.C.CC.CCCC.O.O.O.O
CC1(CC2C3=CCC4C5(CCC(C(C5CCC4(C3(CCC2(C(=O)C1)C)C)C)(C)C)O)C)C
CC1(CC(C2(CCC3(C(=C2C1)CCC4C3(CCC5C4(CCC(C5(C)C)O)C)C)C)C)O)C
C[C@]12CC[C@@H](C(C1CC[C@@]3(C2C(=O)CC4=C5CC(C[C@H](C5CCC43C)O)(C)C)C)(C)C)O
COC1=C(C=C2C(=C1)CC(CO2)C3=CC(=O)C(=C(C3=O)OC)OC)OC
COC1=C(C(=C2C(=C1)CC(CO2)C3=CC(=O)C(=C(C3=O)OC)OC)OC)OC
COC1=C(C=C2CC(COC2=C1OC)C3=CC(=O)C(=C(C3=O)OC)OC)O
COC1=C(C2=C(C(=O)C=C(O2)C3=CC=C(C=C3)O)C(=C1OC)O)[C@H]4C([C@H]([C@H](C(O4)CO)O)O)O
COC1=C(C2=C(C(=O)CC(O2)C3=CC=C(C=C3)O)C(=C1OC)O)[C@H]4[C@@H]([C@H]([C@@H]([C@H](O4)CO)O)O)O[C@H]5[C@@H](C(CO5)(CO)O)O
C[C@]12CC[C@H](C([C@@H]1CC[C@@]3([C@@H]2CC=C4[C@]3(CC[C@@]5([C@H]4C[C@]6(C[C@@H]5OC6=O)C)C)C)C)(C)C)O
CC1=CC[C@H](OC1=O)[C@@H](C)[C@H]2CC[C@@]3([C@@]2(CC[C@]45[C@H]3CC[C@@H]6[C@]4(C5)CC[C@@H]([C@@]6(C)C(=O)O)O[C@H]7[C@@H]([C@H]([C@@H]([C@H](O7)CO)O)O)O)C)C
CC1=CC[C@H](OC1=O)[C@@H](C)[C@H]2CC[C@@]3([C@@]2(CC[C@]45[C@H]3CC[C@@H]6[C@]4(C5)CC[C@@H]([C@@]6(C)C(=O)O)O[C@H]7[C@@H]([C@H]([C@@H]([C@H](O7)CO)O)O)O[C@H]8[C@@H]([C@H]([C@@H]([C@H](O8)C(=O)OC)O)O)O)C)C
CC1=CC[C@H](OC1=O)[C@@H](C)[C@H]2CC[C@@]3([C@@]2(CC[C@]45[C@H]3CC[C@@H]6[C@]4(C5)CC[C@@H]([C@@]6(C)C(=O)O)O[C@H]7[C@@H]([C@H]([C@@H]([C@H](O7)CO)O)O)O[C@H]8[C@@H]([C@H]([C@@H]([C@H](O8)CO)O)O)O)C)C
CC1=CC[C@H](OC1=O)[C@@H](C)[C@H]2CC[C@@]3([C@@]2(CC[C@]45[C@H]3CC[C@@H]6[C@]4(C5)CC[C@@H]([C@@]6(C)C(=O)O)O[C@H]7[C@@H]([C@H]([C@@H]([C@H](O7)CO)O)O)O[C@H]8[C@@H]([C@H]([C@@H]([C@H](O8)C(=O)O)O)O)O)C)C
CC1C2CCC(C34C=CC(C3C2OC1=O)(C5C4C6C(=C5C)C7C(CCC6(C)O)C(C(=O)O7)C)C)(C)O
CC(=CCC1=C(C=CC(=C1)C2CC(=O)C3=C(C=C(C=C3O2)O)O)O)C
CC(=CCC1=CC(=CC(=C1O)CC=C(C)C)C2CC(=O)C3=C(O2)C=C(C=C3)O)C
CC(=CCC1=CC(=CC(=C1O)CC=C(C)C)[C@@H]2CC(=O)C3=C(C=C(C=C3O2)O)O)C
CC(=CCC1=CC(=CC(=C1O)CC=C(C)C)/C=C/C(=O)C2=C(C=C(C=C2)O)O)C
COC1=CC=C(C=C1)C2=CC(=O)C3=C(O2)C=C(C=C3[O-])O
C[C@H]1[C@@H]([C@H]([C@H]([C@@H](O1)OC[C@@H]2[C@H]([C@@H]([C@H]([C@@H](O2)OC3=CC(=C4C(=C3)OC(=CC4=O)C5=CC=C(C=C5)OC)O)O)O)O)O)O)O
CC1=CC2=C(O1)C(=O)C(=CC2=O)OC
COC1=CC(=CC(=C1O)OC)[C@@H]2[C@H]([C@@H](CC3=CC(=C(C(=C23)OC)O)OC)CO)CO[C@H]4[C@@H]([C@H]([C@@H]([C@H](O4)CO)O)O)OC(=O)C5=CC(=C(C(=C5)OC)O)OC
C[C@H]1[C@@H]([C@H]([C@H]([C@@H](O1)O[C@@H]2[C@H](O[C@H]([C@@H]([C@H]2O)O)OC[C@@H]3[C@H]([C@@H]([C@H]([C@@H](O3)OC(=O)[C@]45CCC(=C)C[C@H]4C6=CCC7[C@]8(CC[C@@H]([C@@](C8CC[C@]7([C@@]6(CC5)C)C)(C)C(=O)O)O)C)O)O)O)CO)O)O)O
C[C@H]1[C@@H]([C@H]([C@H]([C@@H](O1)O[C@@H]2[C@H](O[C@H]([C@@H]([C@H]2O)O)OC[C@@H]3[C@H]([C@@H]([C@H]([C@@H](O3)OC(=O)[C@]45CCC(=C)C[C@H]4C6=CCC7[C@]8(CC[C@@H]([C@@](C8CC[C@]7([C@@]6(CC5)C)C)(C)C=O)O)C)O)O)O)CO)O)O)O
C[C@H]1[C@@H]([C@H]([C@H]([C@@H](O1)O[C@@H]2[C@H](O[C@H]([C@@H]([C@H]2O)O)OC[C@@H]3[C@H]([C@@H]([C@H]([C@@H](O3)OC(=O)[C@]45CC[C@@](C[C@H]4C6=CCC7[C@]8(CC[C@@H]([C@@](C8CC[C@]7([C@@]6(CC5)C)C)(C)C=O)O)C)(C)O)O)O)O)CO)O)O)O
C[C@H]1C[C@H]([C@@H]([C@@H]([C@H]1O)O)O)O[C@@H]2[C@H](O[C@H]([C@@H]([C@@H]2O)O)OC[C@@H]3[C@@H]([C@H]([C@H]([C@@H](O3)OC(=O)[C@]45CC[C@H]([C@@H]4[C@H]6C[C@H]([C@@H]7[C@]8(CC[C@H](C([C@@H]8CC[C@]7([C@@]6(CC5)C)C)(C)C)O[C@H]9[C@@H]([C@@H]([C@H]([C@H](O9)CO)O)O)O)C)O)C(=C)C)O)O)O)CO
C[C@H]1[C@@H]([C@H]([C@H]([C@H](O1)O[C@@H]2[C@H](O[C@H]([C@@H]([C@H]2O)O)OC[C@@H]3[C@H]([C@@H]([C@H]([C@@H](O3)OC(=O)[C@]45CC[C@H]([C@@H]4[C@H]6C[C@H]([C@@H]7[C@]8(CC[C@H]([C@@]([C@@H]8CC[C@]7([C@@]6(CC5)C)C)(C)C=O)O)C)O)C(=C)C)O)O)O)CO)O)O)O
C/C/1=C\C2C(C(C(/C(=C/CC1)/C=O)NC(=O)C(C)C)O)C(=C)C(=O)O2
CC1C2=CN=CC(=C2CC(=O)N1)C
C/C/1=C\C2C(C(C(/C(=C/CC1)/C=O)OC(=O)C(C)C)OC(=O)C(C)(C)O)C(=C)C(=O)O2
COC1=C(C=C(C=C1)/C=C/C(/C=C/CN=CN)N=CN)OC
C[C@]1(CCC[C@@]2(C1CCC3C2=CC[C@](C3)(C)C=C)C)CO
C/C/1=C/[C@@H]2[C@@H]([C@@H]([C@H](/C(=C\CC1)/C=O)OC(=O)C(C)C)O)C(=C)C(=O)O2
COC1=CC(=CC(=C1O)OC)C2[C@H]3COC([C@H]3CO2)[C@]4([C@H](O[C@@H]([C@@]([C@H]4O)(O)OC)OC5=CC=CC=C5)C(O)OC)O
COC1=CC(=CC(=C1O[C@H]2[C@@H]([C@H]([C@@H]([C@H](O2)CO)O)O)O)OC)[C@H]3[C@@H]4CO[C@H]([C@@H]4CO3)C5=CC(=C(C(=C5)OC)O[C@H]6[C@@H]([C@H]([C@@H]([C@H](O6)CO)O)O)O)OC
C/C/1=C\C2C(C(C(/C(=C\CC1)/CO)OC(=O)C(C)(C)O)OC(=O)C(C)C)C(=C)C(=O)O2
C/C/1=C\C2C(C(C(/C(=C\CC1)/C=O)OC)OC(=O)C(C)C)C(=C)C(=O)O2
C1[C@@H]([C@H]([C@@H]([C@H](O1)COC(=O)C2=CC(=C(C(=C2)O)O)O)O)O)OC(=O)C3=CC(=C(C(=C3)O)O)O
C1CCC2=CC(=C(C=C2)O)OC3=CC=C(CC[C@@H](C1)O)C=C3
C1CCC2=CC=C(C=C2)OC3=C(C=CC(=C3)CC[C@H](C1)O)O
C1CCC2=CC(=C(C=C2)O)OC3=CC=C(CCC(=O)C1)C=C3
C1CCC2=CC(=C(C=C2)O)C3=C(C=CC(=C3)CCC(=O)C1)O
C1CCC2=CC(=C(C=C2)O)C3=C(C=CC(=C3)CCC(C1)O)O
C1CCC2=CC=C(C=C2)OC3=C(C=CC(=C3)CC[C@H](C1)O)O[C@H]4[C@@H]([C@H]([C@@H]([C@H](O4)CO)O)O)O
C1CCC2=CC(=C(C=C2)O)OC3=CC=C(CC[C@@H](C1)OC4C(C(C(C(O4)COC5C(C(CO5)(CO)O)O)O)O)O)C=C3
COC1=C(C=C(C=C1)C2=CC(=O)C3=C(O2)C(=C(C(=C3O)OC)O)OC)O
[CH2-]COC(=C)OC[CH2+]
CC(=O)NN1C=NC2=C(C1=N)N=CN=C2NC3=CC=CC=C3
C[C@@H](C(=O)C)O
CC(=O)CC1=C2C=C3C(=CC2=C4C(=C1)C5=C(C=[N+]4C)C(=C(C=C5)OC)OC)OCO3
[2H]C1=C(C(=C(C(=C1[2H])[2H])C(=O)C)[2H])[2H]
[3H]C([3H])([3H])OC1=CC(=CC(=C1O)OC([3H])([3H])[3H])C(=O)C
CC(=O)C1=CC(=C(C=C1)O)OC
CC(=O)OCC(CC1=CC(=C(C(=C1)OC)OC)OC)C(CC2=CC(=C(C(=C2)OC)OC)OC)CO
CC(=O)OC1=CC=C(C=C1)C(C=C)OC(=O)C
CC1CC=CC(CC(C2C(CCC2(C=C1)C)C(C)(C)O)OC(=O)C)(C)O
CC(=O)OC1=C(OC2=CC(=CC(=C2C1=O)O)O)C3=CC=CC=C3
CC(=O)OC1=C(C=C(C=C1)C(C=C)OC(=O)C)OC
C[C@H]1CCC[C@H]2[C@@]1(C[C@@]3([C@@H]2OC(=O)C)C(=C)COC3=O)C
C/C(=C/C[C@@H]1C(=C)CC[C@H]2[C@]1(C[C@@H]([C@H](C2(C)C)O)OC(=O)C)C)/C=C
CC(=O)OC[C@]1(CCCC2([C@@H]1CCC3=C[C@@](CC[C@H]32)(C)C(=O)CO)C)C
CCCCCCCCCCCCCC1=C(C(=O)C(=C(C1=O)OC)C)OC(=O)C
CC1=C(C(=O)C2=C(O1)C=C(C=C2)OC(=O)C)C3=CC=CC=C3
CCCCCCC(C=C)OC(=O)C
CC(=O)OC1=CC2=C(C=C1)[C@H]3CC[C@@]4([C@@H]([C@@H]3CC2)CCC4=O)C
CC(=O)OC[C@]1(CCCC2([C@@H]1CCC3=C[C@@](CC[C@H]32)(C)[C@H](CO)O)C)C
CC1=C2[C@H]([C@@H]([C@@]3(CC[C@@H](C(=C)[C@H]3[C@@H]([C@@](C2(C)C)(CC1=O)O)OC(=O)C)OC(=O)CC(C4=CC=CC=C4)N(C)C)C)O)OC(=O)C
CC(=O)OC1C(C(=C)[C@]23[C@H](O2)CC(C3(C1OC(=O)C)C)C4=COC=C4)[C@]5(C=CC(=O)C(C5C(C(=O)OC)OC(=O)C)(C)C)C
CCN1C[C@@]2([C@@H](C[C@@H]([C@@]34[C@@H]2[C@H]([C@@H](C31)[C@@]5([C@@H]6[C@]4(C[C@@]([C@@H]6OC(=O)C)([C@H]([C@@H]5O)OC)O)O)OC(=O)C)OC)OC)OC(=O)C)COC
C[C@H]1[C@@H]([C@H]([C@H](C(O1)OC2[C@H]([C@@H](OC([C@H]2OC(=O)/C=C/C3=CC(=C(C=C3)O)O)CO)OCCC4=CC(=C(C=C4)O)O)OC(=O)C)O)O)O
CC(=CC[C@@H](C1=CC(=O)C2=C(C=CC(=C2C1=O)O)O)OC(=O)C)C
CC1CC(C(=O)[C@]2(C1C[C@@H]3[C@@]4(C2C(=O)[C@H](C([C@@H]4CC(=O)O3)C)OC(=O)C)C)C)O
CC(=O)C1=CC2=C(O1)C=CC3=C2OC(=O)C=C3
CC(=O)O[C@H]1[C@@H](O[C@H]([C@@H]1O)OC2=CC(=CC(=C2C(=O)C3=CC(=CC(=C3)O)O)O)OC)CO
CC(=O)N1CCC2=CC3=C(C4=C2C1CC5=CC=CC=C54)OCO3
CC(=O)OC[C@@H]1[C@H]([C@@H]([C@H]([C@@H](O1)OC2=CC=C(C=C2)O)O)O)O
CC(=O)OCC1=CC2C3C1[C@@H](OC=C3C(=O)O2)CC(=O)O[C@H]4[C@@H]([C@H]([C@@H]([C@H](O4)CO)O)O)O
CC(=O)OC/C=C/C#CC#C/C=C/C1=CC=CO1
CC(=O)OC1CCN2CC3CC(C2C1)CN4C3=CC=CC4=O
CC(=O)O[C@H]1C[C@]([C@H]2[C@@H]1C(=CO[C@@H]2O[C@H]3[C@@H]([C@H]([C@@H]([C@H](O3)CO)O)O)O)C(=O)OC)(C)OC(=O)C
CCN1CC2(CCC(C34C2C(C(C31)C5(CC(C6CC4C5C6OC(=O)C7=CC=CC=C7)OC)OC(=O)C)OC)OC)COC
CC1=C2[C@H]([C@@H]([C@@]3([C@H](C[C@@H](C(=C)[C@H]3C[C@@]2(C[C@@H]1OC(=O)C)C(C)(C)O)O)OC(=O)C)C)OC(=O)C)OC(=O)C4=CC=CC=C4
CCN1C[C@@]2(CC[C@@H]([C@@]34[C@@H]2[C@@H]([C@@](C31)([C@]5(C[C@@H]([C@H]6C[C@@H]4[C@@H]5[C@H]6OC(=O)C)OC)O)O)OC)OC)COC
CCCC(CC/C=C/C=C/C#CC#CC/C=C\CO)OC(=O)C
CC(=O)OC[C@]12CC1[C@H]([C@H]3[C@@H]2[C@@H](OC=C3)O[C@H]4[C@@H]([C@H]([C@@H]([C@H](O4)CO)O)O)O)O
CC(=O)O[C@H]1[C@H]2C3=CC4=C(C=C3CCN5C2(CCC5)C=C1OC)OCO4
CC(=O)OCC[N+](C)(C)C.[OH-]
CC(=O)OC(C)(C)[C@@H]1C2CCC3[C@]4(CC[C@@]56C[C@@]57CC[C@@H](C(C7CC=C6C4(C(C3(O1)O2)O)C)(C)C)O[C@H]8[C@@H]([C@H]([C@@H](CO8)O)O)O)C
CC1CC2[C@H](OC3([C@H]1[C@]4(CC[C@@]56C[C@@]57CC[C@@H](C(C7CCC6C4(C3O)C)(C)C)O)C)O2)C(C)(C)OC(=O)C
CC1=C2[C@H]([C@@H]([C@@]3(CC[C@@H](C(=C)[C@H]3[C@@H]([C@@](C2(C)C)(CC1=O)O)OC(=O)C)OC(=O)/C=C\C4=CC=CC=C4)C)O)O
CC1=C(CCC(=CC2C(C(C1)OC(=O)C(=C)C(COC(=O)C)O)C(=C)C(=O)O2)CO)O
CC(COC(=O)C)C1=C(C2=C(C(=C1O)O)C3(CCCC(C3=C(C2=O)O)(C)C)C)O
CC(=O)OC1CC2=CC3=C(C=C2[C@H]4C1(C5=C(CN4C)C6=C(C=C5)OCO6)C)OCO3
CC1=C2[C@H](C(=O)[C@@]3([C@H](C[C@@H]4[C@]([C@H]3[C@@H]([C@@](C2(C)C)(C[C@@H]1O)OC(=O)C)OC(=O)C5=CC=CC=C5)(CO4)OC(=O)C)O)C)O
CC1=C2[C@H]([C@@H]([C@@]3([C@H](C[C@@H](C(=C)[C@H]3[C@@H]([C@@]2(C[C@@H]1OC(=O)C)C(C)(C)O)OC(=O)C)O)OC(=O)C)C)OC(=O)C4=CC=CC=C4)O
CC(=O)N1CCC2=CC3=C(C4=C2C1=CC5=CC=CC=C54)OCO3
CCC(C)C(=O)C1=C(C(=C(C(=C1O)C)OC/C=C(\C)/CCC=C(C)C)C(=O)C)O
CC(=O)C1=CC2=C(C=C1)OC(CC2=O)(C)C
CCN1C[C@@H]2CCC(C34C2CC(C31)[C@]5(C[C@@H](C6CC4C5C6OC(=O)C)OC)OC(=O)C)OC
CC(=O)OC1=C(C=C(C=C1)CC=C)OC
C[C@H]1C(CC[C@H]2[C@@]1([C@@H](C3=C(C2)OC=C3C)OC(=O)C)C)O
CC(=O)OCC1=CC[C@H]2[C@@H]1[C@@H](OC=C2C(=O)OC)O[C@H]3[C@@H]([C@H]([C@@H]([C@H](O3)CO)O)O)O
CC(=O)OCC1C(C(C(C(O1)OC2=CC(=C3C(=C2)OC=C(C3=O)C4=CC=C(C=C4)O)O)O)O)O
CC(=O)O[C@H]1C[C@@]2([C@@H]3CC[C@@H]4C[C@H](CC[C@@]4([C@H]3CC[C@@]2([C@H]1C5=CC(=O)OC5)C)C)O)O
CC(=O)N[C@]12[C@H]([C@@H]([C@H](O[C@]1(N2)O)CO)O)O
CC(=O)OC([C@H]1[C@H]([C@H]2[C@@H](O1)CC(=O)O2)O)C3=CC=CC=C3
CC1=CC(=O)C2=C(C3=C(C=C2O1)OC([C@H](C3)OC(=O)C)(C)C)O
CC(=O)O[C@@H]1C[C@H]2[C@@]3(C=C1)[C@H](CN2CC4=CC5=C(C=C34)OCO5)O
CC(C)C(C(C)OC(=O)C)(C(=O)OCC1=CCN2C1[C@H](CC2)O)O
CC(=C1CC=C(C1)C(=O)C)C
C[C@H]1[C@H]([C@H]([C@H]([C@@H](O1)O[C@@H]2[C@H]([C@@H](CO[C@H]2OC3CCC4(C5CCC6C7C(CC(OC78CC6(C5(CCC4C3(C)C)C)CO8)C=C(C)C)(C)O)C)O)O[C@H]9[C@@H]([C@H]([C@@H]([C@H](O9)COC(=O)C)O)O)O[C@H]1[C@@H]([C@H]([C@@H](CO1)O)O)O)O)O)O
CC(=O)OCC([C@]1(CCC2C(=C1)CCC3C2(C[C@@H](C[C@@]3(C)CO)O)C)C)O
CC(=O)O[C@@H]1[C@H](C=C2CCN3[C@H]2[C@@H]1C4=CC5=C(C=C4C3)OCO5)O
CC(=O)OC1C=C2CCN3C2C(C1O)C4=CC5=C(C=C4C3)OCO5
CC(=O)OC(COC(=O)C1=CC=CC=C1)/C=C/2\C=CC(=O)O2
CCCCCCCCCCCC1=C(C(=O)C=C(C1=O)OC)OC(=O)C
CC(=O)OC[C@]1(C=C[C@H]2[C@@H]1[C@@H](OC=C2C(=O)O)O[C@H]3[C@@H]([C@H]([C@@H]([C@H](O3)CO)O)O)O)O
C[C@H]1[C@H]([C@H]([C@H]([C@@H](O1)OC[C@@H]2[C@H]([C@@H]([C@H]([C@@H](O2)OC3=C(C(=C4C(=C3)OC(=CC4=O)C5=CC=C(C=C5)OC)OC(=O)C)OC)O)O)O)O)O)O
CCCCC/C=C\C/C=C\CCCCCCCC(=O)OCC1=C[C@H]2[C@H]3[C@](C3(C)C)([C@@H]([C@H]([C@@]2([C@@H]4C=C(C(=O)[C@]4(C1)O)C)O)C)O)OC(=O)C
C/C=C(/C)\C(=O)O[C@@]12[C@@H]([C@H]([C@]3(C(C1C2(C)C)C=C(C[C@]4(C3C=C(C4=O)C)O)CO)O)C)OC(=O)C
CC1C(C2=CC(=C(C(=C2C1=O)C)CCOC(=O)C)C)O
C[C@H]1[C@@H]([C@H]([C@H]([C@@H](O1)OC2=C(OC3=CC(=CC(=C3C2=O)O)O)C4=CC(=C(C=C4)O)O)OC(=O)C)O)O
C[C@H]1[C@@H]([C@H]([C@H]([C@@H](O1)OC[C@@H]2[C@H]([C@@H]([C@H]([C@@H](O2)OC3=C(OC4=CC(=CC(=C4C3=O)O)O)C5=CC(=C(C=C5)O)O)OC(=O)C)O)O)O)O)O
CC(=O)O[C@H]1C=C([C@@H]2[C@H]1C(=CO[C@H]2O[C@H]3[C@@H]([C@H]([C@@H]([C@H](O3)CO)O)O)O)C(=O)O)CO
CC(=O)O[C@]1(C[C@H]([C@H]2[C@@H]1[C@@H](OC=C2C(=O)OC)O[C@H]3[C@@H]([C@H]([C@@H]([C@H](O3)CO)O)O)O)O)C
CC=C1C2CC3C4=C(CCN3C(=O)C2=COC1O[C@H]5[C@@H]([C@H]([C@@H]([C@H](O5)COC(=O)C)O)O)O)C6=CC=CC=C6N4
C[C@@H]1CC[C@@]2(CC[C@@]3(C(=CCC4[C@]3(CCC5[C@@]4(CC([C@@H]([C@@]5(C)C(=O)O)O)OC(=O)C)C)C)C2[C@]1(C)O)C)C(=O)O[C@H]6[C@@H]([C@H]([C@@H]([C@H](O6)CO)O)O)O
CC1=C2[C@H](C(=O)[C@]3(C/C(=C\[C@@H]([C@@H](C2(C)C)C[C@@H]1OC(=O)C)OC(=O)C)/[C@H](C[C@@H]3OC(=O)C)OC(=O)[C@@H]([C@H](C4=CC=CC=C4)N(C)C)O)C)O
CC(C)CC(=O)OC1C2C(=CC(C23CO3)OC(=O)CC(C)(C)OC(=O)C)C(=CO1)COC(=O)C
CC(C)CC(=O)O[C@H]1[C@H]2C(=C[C@@H]([C@]23CO3)OC(=O)CC(C)(C)OC(=O)C)C(=CO1)COC(=O)C
CC(=CCC/C(=C/CC/C(=C/CC/C=C(\C)/CC[C@@H]1C(=C)CC[C@@H](C1(C)C)O)/C)/C)C
CC1=CC[C@@H](C([C@@H]1CC/C(=C/CC/C=C(\C)/CC/C=C(\C)/CCC=C(C)C)/C)(C)C)O
C/C=C/CS
CC(=O)O[C@H]1CC[C@]2(C([C@]1(C)CO)CC[C@@]3(C2[C@@H](C[C@@]4(C3=CC[C@@]5([C@H]4CC(CC5)(C)C)C(=O)O)C)O)C)C
CC(C)[C@@H]1CC[C@]2(CCCC(=C)C2C1=O)C
CC[C@]12CN([C@@H]3[C@H]4C[C@H]1C3(C(CC2O)OC)[C@@]5(C[C@@H]6CCC5([C@H]4OC(=O)C)C6OC(=O)C7=CC=CC=C7)O)CC
CCN1C[C@@]2([C@@H](C[C@@H]([C@]34[C@H]1[C@H](C(C23)OC)[C@]5([C@H]([C@H]([C@]6(CC4C5C6OC(=O)C7=CC=CC=C7)O)OC)O)OC(=O)C)OC)O)COC
C/C/1=C\CC/C(=C/C(=O)C(CC1)C(C)C)/C
CC(=O)CC1=CC(=C(C=C1OC)OC)OC
C[C@H]1CC[C@@]2(CC1=O)[C@H](CC[C@H]2C(C)C)C
C[C@H]1CC(=O)[C@@H]([C@]12CC=C(C(=O)C2)C)C(C)C
CC1C[C@]23C4CCCN2CCC=C3[C@H](C1=O)CC4O
COC1=CC(=C(C2=C1C(=C3C=COC3=N2)OC)OC)OC
CC1(C=CC2=C3C(=C(C=C2O1)OC)C(=O)C4=CC=CC=C4N3C)C
C[C@@](CCl)(C(=O)O[C@@H]1CC(=C)[C@H]2C[C@H]([C@]3([C@H]2[C@H]4[C@H]1C(=C)C(=O)O4)CO3)O)O
CC(C)C[C@H](C1=C(C(=C(C(=C1O)CC=C(C)C)O)C(=O)C)O)C2=C(C(=C(C(=C2O)CC=C(C)C)OC)C(=O)C)O
C[C@@H]1C[C@@]2([C@@H]3[C@](O3)([C@H](O2)O)C)O[C@@H]4[C@H]1[C@]5([C@@H](C[C@@]67C[C@@]68CC[C@@H](C([C@@H]8CC[C@H]7[C@@]5(C4)C)(C)C)O[C@H]9[C@@H]([C@H]([C@@H](CO9)O)O)O)OC(=O)C)C
C[C@@H]1CCC2=C(C=NC=C12)C
COC1=C(C=C2C[C@@H]3C4=C(C2=C1)C5=C(C=C4CCN3)OCO5)O
CC1=CC(=O)OC1(C/C=C(\C)/CCC=C(C)C)OC
CCCCCCCCC/C=C/1\[C@@H]([C@](OC1=O)(C)OC)O
CC1(C(O1)CC2=C(C=C3C(=C2OC)C=CC(=O)O3)OC)C
CC1=CC2C(CC1OC(=O)C)([C@]3([C@@H](C([C@H]([C@]34CO4)O2)O)O)C)COC(=O)C
CC=CC1=CC2=C(C(=C1)OC)OC(C2C)C3=CC(=C(C=C3)OC)OC
CC(=C)C(CC1=C(C2=C(C(=CC=C2)OC)NC1=O)OC)O
C[C@H]1[C@H]([C@H]([C@H]([C@@H](O1)OC2[C@H](O[C@H]([C@@H]([C@H]2O[C@H]3[C@@H]([C@H]([C@@H](CO3)O[C@H]4[C@@H]([C@H]([C@@H]([C@H](O4)CO)O[C@H]5[C@@H]([C@H]([C@H]([C@H](O5)CO)O)O)O)O)O)O[C@H]6[C@@H]([C@H]([C@H]([C@H](O6)CO)O)O)O)O[C@H]7[C@@H]([C@H]([C@H]([C@H](O7)CO)O)O)O)O)OC(=O)[C@]89CCC(CC8C1=CCC2[C@]3(CC[C@@H]([C@@](C3CC[C@]2(C1(CC9)C)C)(C)C=O)O[C@H]1[C@@H]([C@H]([C@@H]([C@H](O1)C(=O)O)O[C@H]1[C…
CC(=C)C(CC1=C(C2=C(C(=CC=C2)OC)N(C1=O)C)OC)O
CCCCCCCCCCCCCCCC(=O)OC(CC1=C(C2=C(C(=CC=C2)OC)N(C1=O)C)OC)C(=C)C
COC1=CC(=O)[C@@]2([C@@H]1O)[C@H](C[C@@]34[C@@]2(CCN3)CC(=O)C(=C4OC)OC)Cl
CN1CC[C@]23[C@]1(C[C@@H]([C@@]24[C@@H](C(=CC4=O)OC)O)Cl)C(=C(C(=O)C3)OC)OC
CN1CC[C@@]23[C@@]1(C[C@@H]([C@@]24CC(=CC4=O)OC)Cl)C(=C(C(=O)C3)OC)OC
CC(=O)O[C@H]1C[C@@H]2C[C@]3([C@@H]1[C@@]4([C@H](C[C@@H](C([C@H]4C(=O)[C@@H]3OC(=O)C)(C)C)O)OC(=O)C)C)C(=O)C2=C
CC(=O)O[C@H]1C[C@@H]2C[C@]3([C@@H]1[C@]4([C@H](C[C@@H]3OC(=O)C)C([C@H](C[C@@H]4OC(=O)C)O)(C)C)C)C(=O)C2=C
CC(=O)OC1CC2C(C(CC(C2(C3C14CC(CC3O)C(=C)C4O)C)O)OC(=O)C)(C)C
CC(=O)O[C@H]1C[C@H]2[C@@]([C@H](C[C@@H](C2(C)C)OC(=O)C)O)([C@H]3[C@]14C[C@@H](C[C@@H]3O)C(=C)C4=O)C
CC(=O)OC1CC2CC3(C1C4(C(CC(C(C4C(=O)C3OC(=O)C)(C)C)O)OC(=O)C)C)C(C2=C)O
CC(=O)OC1CC2CC3(C1C4(C(CC(C(C4C(=O)C3O)(C)C)O)OC(=O)C)C)C(C2=C)OC(=O)C
C[C@H]1C(C[C@H](O1)N2C=NC3=C2N=CN=C3N)(CO)CO
C1NC2=C(N1[C@H]3[C@@H]([C@@H]([C@H](O3)COP(=O)(O)OP(=O)(O)O)O)O)N=CN=C2N
C1=NC2=C(C(=N1)N)N=CN2[C@H]3[C@@H]([C@@H]([C@H](O3)COP(=O)([O-])[O-])O)O
C1=NC2=C(C(=N1)N)N=CN2[C@@H]3[C@@H]([C@@H]([C@H](O3)COP(=O)(O)OP(=O)(O)OP(=O)(O)O)O)O
CNC1=C(C=C(C=C1)C2CCN3C2=NC4=CC=CC=C4C3)C(=O)OC
CCC(C)/C(=C/1\C(=O)C(C(=O)C(C1=O)(CC=C(C)C)O)CC=C(C)C)/O
CN1CCC2=C(C(=C(C3=C2C1CC4=CC(=C(C=C43)OC)OC5=CC(=C(C=C5CC6C7=CC(=C(C=C7CCN6C)OC)OC)OC)OC)OC)OC)OC
C[C@]12CCCC(C1CC[C@@]3(C2CCC4C3(CC[C@@H]5C46CCC5C(OC6)(C)O)C)C)(C)C
CN1CCC2=CC3=C(C=C2[C@H]1[C@@H]4C5=C(C6=C(C=C5)OCO6)C(=O)O4)OCO3
CC12CC[C@@H](CC1=CCC3C2CCC45C36CCC4C(O6)(OC5=O)C)O
C([C@H](C([C@H](CO)O)O)O)O
C[C@H]1[C@@H]([C@H]([C@H]([C@@H](O1)OC2CCC3(C(C2)CCC4C3CCC5(C4(CC(C5C6=CC(=O)OC6)O)O)C)C=O)O)O)O
CC1=C(C(C[C@@H](C1)O)(C)C)/C=C/C(=C/C=C/C(=C/C=C/C=C(\C)/C=C/C=C(\C)/C=C/C2=C(C(=O)[C@H](CC2(C)C)O)C)/C)/C
CCC(C)C1C(=O)N/C=C\C2=CC=C(C=C2)OC(C(C(=O)N1)NC(=O)C(CC(C)C)N(C)C)C(C)C
CCC(C)C1C(=O)N/C=C\C2=CC=C(C=C2)OC(C(C(=O)N1)NC(=O)C(CC3=CC=CC=C3)N(C)C)C4=CC=CC=C4
CCC(C)C1C(=O)N/C=C\C2=CC=C(C=C2)OC(C(C(=O)N1)NC(=O)C(CC3=CC=CC=C3)N(C)C)C(C)C
C[NH2+]CC(C1=CC(=C(C=C1)O)O)O
C[C@@H]1[C@@H]([C@@H](C[C@@H](O1)OC2CCC3(C(C2)CCC45C3CCC6(C4(O5)CCC6C7=CC(=O)OC7)C)C)OC)O
CC1(CCCC2(C1(CC(=O)O2)O)C)C
C[C@]12CC[C@@H]([C@](C1CC[C@@]3(C2CC=C4[C@]3(C[C@@H]5[C@@]6([C@H]4CC([C@@H]([C@@H]6O)O5)(C)C)CO)C)C)(C)CO)O
C/C=C(\C)/C(=O)O[C@H]1[C@@H]([C@@]2([C@@H](C[C@@]3(C(=CCC4[C@]3(CCC5[C@@]4(CC[C@@H]([C@]5(C)CO)O[C@H]6[C@@H]([C@H]([C@@H]([C@H](O6)C(=O)O)O[C@H]7[C@@H]([C@H]([C@@H]([C@H](O7)CO)O)O)O)O)O[C@H]8[C@@H]([C@H]([C@@H](CO8)O)O)O)C)C)C2CC1(C)C)C)O)CO)OC(=O)C
COC1=C(C=C(C=C1)C2=C(C(=O)C3=C(C=C(C=C3O2)O)O)O[C@H]4[C@@H]([C@H]([C@@H]([C@H](O4)CO)O)O)O[C@H]5[C@@H]([C@H]([C@@H](CO5)O)O)O)O[C@H]6[C@@H]([C@H]([C@@H]([C@H](O6)CO)O)O)O
C1=CC(=O)OC2=CC(=C(C=C21)O)O
C1=CC(=O)OC2=CC(=C(C=C21)O[C@H]3[C@@H]([C@H]([C@@H]([C@H](O3)CO)O)O)O)O.O
C[C@@H]1CC[C@@]2([C@H]([C@H]3[C@@H](O2)C[C@@H]4[C@@]3(CC[C@H]5[C@H]4CC=C6[C@@]5(CC[C@@H](C6)O[C@H]7[C@@H]([C@H]([C@@H]([C@H](O7)CO)O[C@H]8[C@@H]([C@](CO8)(CO)O)O)O)O[C@H]9[C@@H]([C@@H]([C@H]([C@@H](O9)C)O)O)O)C)C)C)OC1
C/C=C\1/CC2[C@H]3C[C@@H]1C(N2CC4=C3N(C5=CC=CC=C45)C)CO
COC1=C2C3=C(C(=O)CC3)C(=O)OC2=C4[C@H]5C=CO[C@H]5OC4=C1
COC1=C2C3=C(C(=O)CC3)C(=O)OC2=C4[C@@H]5CCO[C@@H]5OC4=C1
COC1=C2C3=C(C(=O)OCC3)C(=O)OC2=C4[C@@H]5C=CO[C@@H]5OC4=C1
COCC1CN(C(=O)O1)C2=CC=C(C=C2)OCC3=CC(=CC=C3)Cl
C[C@]12CCCC([C@@H]1CC[C@]3([C@@H]2C/C=C(\CC=O)/C=O)CO3)(C)C
COC1=CC=C(C=C1)C2=COC3=CC(=C(C=C3C2=O)OC)O
C1C([C@H](OC2=CC(=CC(=C21)O)O)C3=CC=C(C=C3)O)O
COC1=CC=C(C=C1)[C@@H]2[C@H](C3=C(O2)C=C4C(=C3O)C(=O)CC(O4)C5=CC=C(C=C5)O)C(=O)C6=C(C=C(C=C6)O)O
C[C@@]12CCC(=O)C([C@H]1CC[C@]3([C@H]2CC[C@](O3)(C)[C@@H](CCl)O)C)(C)C
CC1([C@H]2[C@@H](C[C@@]34C[C@H](CC[C@H]3[C@]25CC[C@@]1(OC5)O)C(=C)C4)O)C
C[C@@]1(CC[C@@H]2[C@@](O1)(C[C@H]([C@@H]([C@@]2(C)CCC(=O)OC)C(C)(C)O)O)C)C=C
C[C@]12CC[C@@H]([C@@]3([C@@H]1[C@H](C[C@](O2)(C)C=C)OC(=O)C3)C)C(C)(C)C(=O)OC
CC(=C)[C@H]1CC[C@@]23C[C@H](CC[C@H]2[C@]1(C)CCC(=O)OC)C(=C3)CO
CC1CCC2(C(C3C(O2)CC4C3(C(=O)CC5C4CCC6C5(CCC(C6)OC7C(C(C(C(O7)CO)OC8C(C(C(C(O8)CO)O)OC9C(C(C(C(O9)CO)O)O)O)OC2C(C(C(C(O2)CO)O)OC2C(C(C(CO2)O)O)O)O)O)O)C)C)C)OC1
C1=CC(=CC=C1CO)NNC(=O)CCC(C(=O)[O-])[NH3+]
COC(C(C1C(C(CO1)O)O[C@H]2[C@@H]([C@H]([C@H]([C@H](O2)CO)O)O)O)O)OC
CC1CC2C(CC(=O)C3=COC(=C23)C1O)C(C)C
CC1CCC=C(C12CCC(C2)C(C)(C)O)C
COC1=CC=C(C=C1)C2=CC(=O)C3=C(C=C(C=C3O2)O[C@H]4[C@@H]([C@H]([C@@H]([C@H](O4)COC(=O)CC(=O)OC[C@@H]5[C@H]([C@@H]([C@H]([C@@H](O5)OC6=CC(=C7C(=C6)OC(=CC7=O)C8=CC=C(C=C8)OC)O)O)O)O)O)O)O)O
CC(=O)OC[C@@H]1[C@H]([C@@H]([C@H]([C@@H](O1)OC2=CC(=C3C(=C2)OC(=CC3=O)C4=CC=C(C=C4)OC)O)O)O)O
C1=CC(=CC=C1C2=CC(=O)C3=C(C(=C(C=C3O2)O)C4=C(C=C(C5=C4OC(=CC5=O)C6=CC=C(C=C6)O)O)O)O)O
C/C(=C/CO)/CC[C@H]1C(=C)CCC2[C@@]1(CCC[C@@]2(C)CO)C
CC1CCC2(C(C3C(O2)CC4C3(C(=O)CC5C4CCC6C5(CCC(C6)OC7C(C(C(C(O7)CO)OC8C(C(C(C(O8)CO)OC9C(C(C(C(O9)CO)O)OC2C(C(C(C(O2)C)OC2C(C(C(C(O2)C)O)O)O)O)O)OC2C(C(C(CO2)O)O)O)O)O)O)O)C)C)C)OC1
CC1C2C(CC3C2(C(=O)CC4C3CCC5C4(CCC(C5)OC6C(C(C(C(O6)CO)OC7C(C(C(C(O7)CO)OC8C(C(C(C(O8)CO)O)OC9C(C(C(CO9)O)O)O)OC2C(C(C(C(O2)C)O)OC2C(C(C(C(O2)C)O)O)O)O)O)O)O)O)C)C)OC1(CCC(C)COC1C(C(C(C(O1)CO)O)O)O)O
C[C@@H]1CC[C@@]2([C@H]([C@H]3[C@@H](O2)C[C@@H]4[C@@]3(C(=O)C[C@H]5[C@H]4CC[C@@H]6[C@@]5(CC[C@@H](C6)O[C@H]7C(C([C@H](C(O7)CO)O)O)O)C)C)C)OC1
CS/C=C/C(=O)NCCCCNC(=O)/C=C/SC
C1=CC=C(C=C1)CC(=O)NCCCCNC(=O)CC2=CC=CC=C2
C[C@@]12CC[C@@H]([C@H]1CC[C@H]3[C@]2(CC[C@@H]4[C@@]3(CC[C@@H](C4(C)C)O)C)C)C(=C)CC[C@@H]5C(O5)(C)C
CS/C=C/C(=O)NCCCCNC(=O)CC1=CC=CC=C1
CN(C)C(=O)[C@@H]1[C@H]([C@]2([C@@]([C@@H]1O)(C3=C(C4=C(C=C3O2)OCO4)OC)O)C5=CC=C(C=C5)OC)C6=CC=CC=C6
C(CC[NH+]=C(N)N)C[NH3+]
CCCC(=O)C1=C(C(=C(C(=C1O)CC2=C(C(=C(C(=C2O)C)OC)C(=O)CCC)O)O)CC3=C(C(=C(C(=C3O)C)OC)C(=O)CCC)O)O
CCCC(=O)C1=C(C(=C(C(=C1O)CC2=C(C(=C(C(=C2O)C)OC)C(=O)CCC)O)O)CC3=C(C(=C(C(=C3O)C)OC)C(=O)C)O)O
CC1=C(C(=C(C(=C1OC)C(=O)C(C)C)O)CC2=C(C(=C(C(=C2O)C(=O)C(C)C)O)CC3=C(C(=C(C(=C3O)C)OC)C(=O)C(C)C)O)O)O
C1C2C(C3C(C(O2)OC(=O)C4=CC(=C(C(=C4)OC5=C(C(=C(C=C5C(=O)OC6C7C(C8C(O6)COC(=O)C9=CC(=C(C(=C9C2=C(C(=C(C=C2C(=O)O8)O)O)O)O)O)O)OC(=O)C2=CC(=C(C(=C2C2=C(C(=C(C=C2C(=O)O7)O)O)O)O)O)O)O)O)O)O)O)OC(=O)C2=CC(=C(C(=C2C2=C(C(=C(C=C2C(=O)O3)O)O)O)O)O)O)OC(=O)C2=CC(=C(C(=C2C2=C(C(=C(C=C2C(=O)O1)O)O)O)O)O)O
COC1=CC=C(C=C1)CC[C@H]2CC3=CC(=CC(=C3C(=O)O2)O)O
CCCC(=O)C1=C(C(=C(C(=C1O)CC2(C(=O)C(=C(/C(=C(\C(C)CC)/O)/C2=O)O)C)C)O)C)OC
CC1=CC2(C3=C4C(=CNC4=CC=C3)CC2([NH+](C1)C)C)C
CC#CC#CCC1=CC=CC=C1
C[C@H](CCC(=C)C(C)C)[C@H]1CC[C@@]2([C@@]1(CC=C3[C@H]2CC[C@@H]4[C@@]3(CC[C@@H](C4(C)C)O)C)C)C
C1=CC=C(C=C1)CCC2=CC(=O)C3=CC(=C(C=C3O2)OC4[C@@H]([C@@H](C(C5=C4C(=O)C=C(O5)CCC6=CC=CC=C6)O)O)O)OC7[C@H](C([C@H](C8=C7C(=O)C=C(O8)CCC9=CC=CC=C9)O)O)O
C1=CC=C(C=C1)CCC2=CC(=O)C3=C(O2)[C@H](C(C([C@H]3O)OC4=C5C(=O)C=C(OC5=C(C=C4)OC6[C@H]([C@H](C(C7=C6C(=O)C=C(O7)CCC8=CC=CC=C8)O)O)O)CCC9=CC=CC=C9)O)O
CCC(C)C(=O)O[C@@H]1[C@H]2[C@H](C([C@@]3(C4C2(CO3)[C@@H](C[C@@H]5[C@@]4([C@@H](C(=O)C=C5C)O)C)OC1=O)O)O)C
CC(CCOC1=CC=C(C=C1)/C=C/CO)CO
COC1=C(C=CC(=C1)C2=CC3=CC(=CC(=C3O2)OC)/C=C/CO)O
CC1=CC(=O)[C@H]([C@]2([C@H]1C[C@@H]3[C@@]45[C@@H]2[C@@]([C@@H](C(=C)[C@@H]4CC(=O)O3)O)(OC5)O)C)O
CCN1C[C@@]2(CC[C@H]([C@]34[C@H]1[C@@](C(C23)OC)([C@]5(C[C@@H]([C@H]6C[C@@H]4C5C6OC)OC)O)O)OC)COC(=O)C7=CC=CC=C7NC(=O)C
C[C@@]12CCC[C@]34[C@@H]1C[C@H](C56[C@H]3C[C@H](CC5)C(=C)[C@H]6O)OC4N(C2)CCO
C[C@H]1[C@H]2CN3CCC4=C([C@@H]3C[C@@H]2C(=CO1)C(=O)OC)NC5=CC=CC=C45
CC[C@H]1[C@@H]2C[C@H]3[C@H]4[C@@]5(C[C@@H](C2[C@H]5O)[NH+]3[C@@H]1O)C6=CC=CC=C6N4C
C=CCSS/C=C\CS(=O)CC=C
C/C=C(\C)/C(=O)OC[C@@]12[C@H](CCCC13CO3)[C@@]([C@@H](C[C@@H]2OC(=O)C)C)(C)CCC4=CC(=O)OC4
CCC1=C(C(=O)OC(C1)C(C)([C@H]2CC[C@@]3([C@@]2(C(=O)C[C@H]4C3=CC(=O)[C@H]5[C@@]4(C[C@@H]([C@@H](C5)O)O)C)C)O)O)C
CC1CC(C2(C(C1(C)CCC3=CC(=O)OC3)CCCC24CO4)COC(=O)C)OC(=O)C
CC(C)CC[C@H]([C@@](C)(C1CC[C@@]2([C@@]1(C[C@H](C3C2=CC(=O)C4[C@@]3(C[C@@H]([C@@H](C4)O)O)C)O)C)O)O)O
C[C@@]1(CC[C@@H]2[C@H]1C(OC=C2)O[C@@H]3[C@@H]([C@H]([C@@H]([C@@](O3)(CO)O)O)O)O)O
CC(=O)O[C@]1(CC([C@H]2[C@@H]1[C@@H](OC=C2)O[C@H]3[C@@H]([C@@H]([C@H]([C@H](O3)CO)O)O)O)O)C
C/C=C(/C=O)\[C@H]1C[C@@H](N2C3=CC=CC=C3C4=C2C(C1)N(CC4)C)O
C[C@H]1[C@@H]([C@H]([C@H]([C@@H](O1)O[C@@H]2[C@H](O[C@H]([C@@H]([C@H]2O)O)OC[C@@H]3[C@H]([C@@H]([C@H]([C@@H](O3)OC(=O)[C@@]45CC[C@@]6(C(=CC[C@H]7[C@]6(CCC8[C@@]7(CC[C@@H](C8(C)C)O[C@H]9[C@@H]([C@H]([C@H](CO9)O)O)O[C@H]1[C@@H]([C@H]([C@@H]([C@H](O1)C)O)O)O)C)C)[C@H]4CC(CC5)(C)C)C)O)O)O)CO)O)O)O
C[C@H]1[C@H]([C@H]([C@H]([C@@H](O1)OC[C@@H]2[C@H]([C@@H]([C@H]([C@@H](O2)O[C@@H]3[C@H]([C@@H](CO[C@H]3O[C@H]4CC[C@]5(C(C4(C)C)CC[C@@]6(C5CC=C7C6(CC[C@@]8(C7CC(CC8)(C)C)C(=O)O[C@H]9[C@@H]([C@H]([C@@H]([C@H](O9)CO[C@H]1[C@@H]([C@H]([C@@H]([C@H](O1)CO)O[C@@H]1[C@@H]([C@@H]([C@H]([C@@H](O1)C)O)O)O)O)O)O)O)O)C)C)C)O)O)O)O)O)O)O)O
COC1=C(C2=C(CC[C@@]34[C@@]2(CCN3)CC(=O)C(=C4OC)OC)C=C1)O
C/C=C\1/CN2CC[C@@]34[C@@H]2C[C@@H]1C(=C3NC5=CC=CC=C45)C(=O)OC
C[C@H](C1=C2C=C3C4=CC(=C(C=C4CCN3C(=O)C2=CN=C1)OC)O)O
CC[C@H]1CN2CCC3=C(C(=C(C=C3[C@@H]2C[C@@H]1CC4=C5C=C(C(=O)C=C5CCN4)OC)OC)OC)O
CC[C@H]1CN2CCC3=C(C(=C(C=C3[C@@H]2C[C@@H]1C[C@@H]4C5=C(CCN4)C6=CC=CC=C6N5)OC)OC)O
COC1=C(C=C2C(=C1)CCN3C2=CC4=C(C=NC=C4C3=O)C=C)O
C[C@@H](C(=O)[O-])[NH3+]
C[C@@H]1CCC[C@@]2(C1=C[C@@H]3[C@H](C2)OC(=O)C3=C)C
COC1=CC(=CC(=C1O)OC)/C=C\C(=O)O[C@H]2C(O[C@H](C(C2O)O)OC3=C([O+]=C4C=C(C=C(C4=C3)O)O)C5=CC(=C(C=C5)O)O)CO[C@H]6C(C([C@@H](C(O6)CO)O)O)O
COC1=CC(=CC(=C1O)OC)/C=C/C(=O)O[C@@H]2C(O[C@H](C(C2O)O)OC3=C([O+]=C4C=C(C=C(C4=C3)O)O)C5=CC(=C(C=C5)O)OC)CO[C@H]6C(C([C@@H](C(O6)CO)O)O)O
CC(C)C(=O)O[C@@H]1C/C(=C\CC/C(=C\[C@@H]2[C@@H]1C(=C)C(=O)O2)/CO)/CO
CC1=CC(=C(C(=C1)O)CC2[C@]3(CCCC([C@@H]3CC[C@@]2(C)O)(C)C)C)O
CC(=CCC/C(=C/CC1=C(C=C(C=C1C2=CC3=C(O2)C=C(C=C3)O)O)O)/C)C
CC1=C[C@H]2C3[C@H](C1)C4=C(C=C(C=C4)O)O[C@]3(OC5=C2C(=CC(=C5)C6=CC7=C(O6)C=C(C=C7)O)O)C8=C(C=C(C=C8)O)O
CCCC(=O)C1=C(C(=C(C(C1=O)(C)C)O)CC2=C(C(C(=O)C(=C2O)C(=O)CCC)(C)C)O)O
C[C@]1(C[C@]2([C@]3(C[C@@H]1C3(C(=O)O2)COC(=O)C4=CC=CC=C4)O[C@H]5[C@@H]([C@H]([C@@H]([C@H](O5)CO)O)O)O)C)O
C(C(C(=O)O)N)NC(=O)N
C/C=C(/C)\C(=O)O[C@@H]1C2=C(C[C@@H]3[C@]1([C@H](CCC3)C)C)OC=C2C
CC(=O)OC[C@]1(CCC[C@@]2([C@@H]1C[C@H]([C@]34[C@H]2C[C@@H]([C@H]([C@H]3O)C(=C)C4=O)O)O)C)C
CC(=C)[C@@H]1CN2C=CC(N=C2N1OC)(C)C
CC(=O)O[C@]12C([C@@H]([C@]3(CC(C1C3OC(=O)C4=CC=CC=C4)C56[C@@H]7C(C2C5N(C[C@@]7(CCC6OC)COC)C=O)OC)O)OC)O
C[C@]12CCC(=O)C=C1CCC3C2[C@H](C[C@]4(C3CC[C@@H]4C(=O)CO)C=O)O
CC1=C([C@H]2[C@H](C1)C(=O)C(=CC[C@]2(C)C/C=C/C(C)(C)O)CO)C=O
CC(C)C1=C[C@@H]2[C@@H](CC[C@]2(C)O)C(=C)CC1
CC(C[C@@H]([C@H](C(C)(C)O)O)O)C1=C2C[C@@H]([C@H]3[C@]4(CCC(=O)C([C@@H]4CC[C@@]3([C@]2(CC1)C)C)(C)C)C)O
C[C@H](C[C@@H]([C@@H]1C(O1)(C)C)O)C2=C3C[C@@H](C4[C@]5(CCC(=O)C(C5CC[C@@]4([C@]3(CC2)C)C)(C)C)C)O
C[C@H](C[C@@H]([C@@H]1C(O1)(C)C)OC(=O)C)C2=C3CC(C4[C@]5(CCC(=O)C(C5CC[C@@]4([C@]3(CC2)C)C)(C)C)C)O.CC(=O)[O-]
CC(C[C@@H]([C@@H]1C(O1)(C)C)O)C2=C3C[C@@H]([C@H]4[C@]5(CCC(=O)C([C@@H]5CC[C@@]4([C@]3(CC2=O)C)C)(C)C)C)O
C[C@H](C[C@@H]([C@@H](C(C)(C)O)O)OC(=O)C)C1=C2C[C@@H]([C@H]3[C@]4(CCC(=O)C(C4CC[C@@]3([C@]2(CC1)C)C)(C)C)C)O
C[C@H](C[C@@H]([C@H](C(C)(C)O)OC(=O)C)O)C1=C2CC(C3[C@]4(CCC(=O)C(C4CC[C@@]3([C@]2(CC1)C)C)(C)C)C)O
CCN(CC1=CC(=CC=C1)S(=O)(=O)[O-])C2=CC=C(C=C2)C(=C3C=CC(=[N+](CC)CC4=CC(=CC=C4)S(=O)(=O)[O-])C=C3)C5=CC=CC=C5Cl.[Na+]
CC(C)CCCC1=CC(=O)C2=C(C=CC(=C2C1=O)O)O
C/C=C\1/C2[C@@]3(C=C[C@H]4[C@@H]3[C@@H](O2)O[C@@H]([C@H]4C(=O)OC)O)OC1=O
CCC1=C[C@@]2(C=C[C@H]3[C@@H]2[C@@H](OC=C3C(=O)OC)O)OC1=O
C1(=O)C(=NC(=O)N1)NC(=O)N
C=CCSS(=O)CC=C
C=CCS(=O)CC(C(=O)[O-])[NH3+]
CC1=NC=C(C(=N1)N)CN(/C=C(\CCO)/SSC=C)C=O
C=CCSSSCC=C
COC1=C(C=CC(=C1)C2=C(C(=O)C3=C(C=C(C=C3O2)O)O)O)O[C@H]4[C@@H]([C@H]([C@@H]([C@H](O4)CO)O)O)O
CCCCCC1=C(C(=O)C(=C(O1)C)OC)O
CN1CCC2=CC3=C(C=C2C(=O)CC4=C(C1)C(=C(C=C4)OC)OC)OCO3
CC(=CCC1=C2C=CC(=O)OC2=C(C3=C1C=CO3)O)C
CC(=CCC1=C2C(=C(C3=C1OC(=O)C=C3)O)C=CO2)C
CCC(C)[C@H](C(=O)O)N
CC1COCC2=C(C(CC12)O)C
C1CC2C3CCC[NH+]4C3C(CCC4)CN2C(=O)C1
C/C=C(\C)/C=C\C=C(C)C
C1CCN2C(C1)C34CC2C=CC3=CC(=O)O4
CC1(C=CC2=C(C=C3C(=C2O1)C=CC(=O)O3)OC)C
COC(=O)[C@H]1[C@H](CC[C@H]2[C@@H]1C[C@H]3C4=C(CCN3C2)C5=CC=CC=C5N4)O
C=CCCO
COC1=CC(=C(C=C1)CC=C)OC
C=CCSS/C=C/C=O
C=CCSSCC=C
C=CCN=C=S
CSSSSSCC=C
CSSSSCC=C
CSSSCC=C
C=CCSCC=C
CCCSSCC=C
C=CCC1=C(C(=CC=C1)O)O
COC1=CC(=C(C=C1CC=C)OC)OC
C1[C@H]([C@@H]([C@H]([C@@H](O1)O[C@@H](CCC2=CC(=CC=C2)O)CC(=O)CCC3=CC(=C(C=C3)O)O)O)O)O
C1[C@H]([C@@H]([C@H]([C@@H](O1)O[C@@H](CCC2=CC(=C(C=C2)O)O)CC(=O)CCC3=CC=C(C=C3)O)O)O)O
C1[C@@H]2[C@H]([C@H]3[C@H]([C@@H](O2)O)OC(=O)C4=CC(=C(C(=C4C5=C(C(=C(C=C5C(=O)O3)O)O)O)O)O)O)OC(=O)C6=CC(=C(C(=C6OC7=C8C(=CC(=C7O)O)C(=O)OC9=C8C(=CC(=C9O)O)C(=O)O1)O)O)O
C1=CC=C(C=C1)CCC(=O)/C=C/C=C/C2=CC=CC=C2
C1CC2=CC(=C(C=C2)O)C3=C(C=CC(=C3)CCC(=O)CC1O)O
C1=CC2=C(C(=C1)O)C(=O)C3=C(C=C(C=C3C2=O)CO)O
C1=CC2=C(C(=C1)O)C(=O)C3=C(C=C(C=C3[C@H]2[C@H]4C5=C(C(=CC=C5)O)C(=O)C6=C(C=C(C=C46)CO)O)CO)O
C1=CC2=C(C(=C1)O[C@H]3[C@@H]([C@H]([C@@H]([C@H](O3)CO)O)O)O)C(=O)C4=C(C=C(C=C4C2=O)CO)O[C@H]5[C@@H]([C@H]([C@H]([C@H](O5)CO)O)O)O
C1=CC2=C(C(=C1)O[C@H]3[C@@H]([C@H]([C@@H]([C@H](O3)CO)O)O)O)C(=O)C4=C(C=C(C=C4C2=O)CO)O
CC1=CC(=CC(=C1C2=CC(=CC(=O)O2)OC)OC3[C@@H]([C@H]([C@@H]([C@H](O3)CO)O)O)O)O
CC1=CC(=C(C2=C1C(=O)C=C(O2)CC(=O)C)C3[C@@H]([C@H]([C@@H]([C@H](O3)CO)O)O)OC(=O)/C=C/C4=CC=C(C=C4)O)O
CC1=CC(=C(C2=C1C(=O)C=C(O2)CC(=O)C)[C@H]3[C@@H]([C@H]([C@@H]([C@H](O3)CO)O)O)OC(=O)/C=C/C4=CC=C(C=C4)O)O[C@H]5[C@@H]([C@H]([C@@H]([C@H](O5)CO)O)O)O
C/C=C/C1=CC(=O)C2=C(O1)C(=C(C=C2C)OC)[C@H]3[C@@H]([C@H]([C@@H]([C@H](O3)CO)O)O)OC(=O)/C=C/C4=CC=C(C=C4)O
CC1=CC(=C(C2=C1C(=O)C=C(O2)CC(=O)C)C3[C@@H]([C@H]([C@@H]([C@H](O3)CO)O)O)O)[O-]
CC1=CC(=CC2=C1C(=O)C=C(O2)CC(=O)C)O
C1=CC2=C(C(=C1)O)C(=O)C3=C(C=C(C=C3[C@H]2[C@H]4[C@@H]([C@H]([C@@H]([C@H](O4)CO)O)O)O)CO)O
C1C[C@@H]([C@@H]([C@@H](C2=C([C@@H]([C@@H]([C@@H]1O)O)O)C(=O)C=CC2=O)O)O)O
C1CCN2C[C@@H]3C[C@H]([C@H]2C1)C=C4[C@H]3NCCC4
COC1=CC=C(C=C1)C2CC(=O)C3=C(C=C(C=C3O2)O)OC
COC1=CC(=C2C(=C1)OC(C(C2=O)O)C3=CC=CC=C3)O
CC1(C=CC2=C(O1)C=C3C(=C2O)C(=O)C(=CO3)C4=CC=C(C=C4)O)C
CC(=O)C1=COCC2C1CC3C4(CC2N3)C5=CC=CC=C5N(C4=O)C
CC(=O)C1=COC[C@H]2[C@@H]1C[C@@H]3C4=C(C[C@H]2N3C)C5=CC=CC=C5N4C
C[C@H]1[C@@H]2CN3C=CC4=C5C=CC=CC5=NC4=C3C[C@@H]2C(=CO1)C(=O)OC.Cl
COC1=CC=CC2=C1C3=C(N2)[C@@H]4C[C@H]5[C@H](CC[C@H]([C@H]5C(=O)OC)O)CN4CC3
C1=CC=C(C=C1)[C@@H]2[C@H]([C@H]3[C@@H](O2)C=CC(=O)O3)O
CC(=CCC1=CC(=C(C2=C1C(=O)C3=C(C(=C(C=C3O2)O)C(C)(C)C=C)O)O)O)C
C[C@H]([C@](C(C)C)(C(=C)OCC1=CCN2C1[C@@H](CC2)O)O)O
C[C@@H]1C[C@H]2[C@@H](CC(=O)O2)C[C@]3([C@H]1[C@@H]4[C@H]([C@@H]3O)O4)C
C\1[C@H]([NH2+]C(=C/C1=C/C=[N+]2[C@@H](CC3=CC(=C(C=C32)[O-])OC4[C@@H]([C@H]([C@@H]([C@H](O4)CO)O)O)OC5[C@@H]([C@H]([C@@H]([C@H](O5)C(=O)[O-])O)O)O)C(=O)[O-])C(=O)O)C(=O)[O-]
CCC(CC([C@@](C)([C@H]1CCC2([C@@]1(CCC3C2=CC(=O)[C@]4([C@@]3(C[C@@H]([C@@H](C4)O)O)C)C)C)O)O)O)C(C)CO
CC(C)C(CCO)CC([C@@](C)([C@H]1CCC2([C@@]1(CCC3C2=CC(=O)[C@]4([C@@]3(C[C@@H]([C@@H](C4)O)O)C)C)C)O)O)O
C=CC1C2CCOC(=O)C2=COC1OCC3C(C(C(C(O3)OC(=O)C4=CC(=C(C(=C4)O)C5=CC(=CC=C5)O)O)O)O)O
C[C@@H]1C[C@@H](C(=O)[C@]2([C@H]1C[C@@H]3[C@@]4([C@@H]2[C@@H](C(=O)[C@@H]([C@@H]4CC(=O)O3)C)O)C)C)O
C=C[C@H]1[C@@H](OC=C2[C@]1(CCOC2=O)O)O[C@H]3[C@@H]([C@H]([C@@H]([C@H](O3)CO)O)O)OC(=O)C4=C(C=C(C=C4C5=CC(=CC=C5)O)O)O
CO[C@@H]1C[C@@H]2[C@]3(C=C1)[C@H](CN2CC4=C(C5=C(C=C34)OCO5)OC)O
C[C@@H]1C2[C@@H]3[C@H](C(C(=O)O3)C)C(CC(=C)C2CC1=O)O
CC12C(CC3=CC(=C(C=C3C1N(CC4=C5C(=C(C=C24)OC)OCO5)C)OC)OC)O
C/C(=C\CC[C@@H]1[C@]2(CCCC([C@@H]2CC[C@@]1(C)O)(C)C)C)/CC[C@@H]3C(=C)CCCC3(C)C
C1CCCCOC(=O)CCCCC/C=C\CCC1
CC1CCC2C(C3(C1C=CC3=O)C)OC(=O)C2=C
C1=CC(=CC=C1C2=CC(=O)C3=C(O2)C(=C(C=C3O)O)C4=C(C=CC(=C4)C5=CC(=O)C6=C(C=C(C=C6O5)O)O)O)O
C1=CC2=C(C=C1/C=C/C=O)O[C@H]([C@@H](O2)C3=CC(=C(C=C3)O)O)CO
C1=CC(=NC=C1O)CNC2=NC=NC3=C2N=CN3[C@H]4[C@@H]([C@@H]([C@H](O4)CO)O)O
C1=C2C(=NC(=N1)N)N=CC(=O)N2
C1=CC(=CC(=C1)O)N
C1=CC=C(C=C1)ON
C1=CC(=CC=C1N)O
CN(C)NC(=O)CCC(=O)O
COC1=C2C(=O)C=C(OC2=C(C3=C1C=CO3)OC)CO
CC(=CCC1=C(C2=C(C(=C1OC)CC=C(C)C)OC(CC2=O)C3=CC(=C(C=C3)O)O)O)C
C1=C(C=C(C(=C1O)O)O)[C@@H]2[C@H](C(=O)C3=C(O2)C=C(C=C3[O-])O)O
C1=CC2=C3C(C(OC3=C1)C4=CC=C(C=C4)O)C5=C(C=C(C=C5C(C2O)C6=CC=C(C=C6)O)O)O
C1[C@H](C2=C(C=C(C=C2[C@@H]3[C@H](OC4=C3C1=CC(=C4)O)C5=CC=C(C=C5)O)O)O)C6=CC=C(C=C6)O
C1=CC(=CC=C1/C=C/2\[C@H]([C@@H](C3=C(C=C(C=C23)O)O)C4=CC=C(C=C4)O)C5=CC(=CC(=C5)O)O)O
CC(CO)C1=CC(=C(C=C1)O[C@H]2[C@@H]([C@H]([C@@H]([C@H](O2)COC(=O)C3=CC(=C(C(=C3)O)O)O)O)O)O)OC
CC[C@H](C)[C@H]1C(=O)N/C=C\C2=CC=C(C=C2)O[C@H]([C@@H](C(=O)N1)NC(=O)[C@H](CC3=CNC4=CC=CC=C43)N(C)C)C(C)C
CCC(C)C1C(=O)N/C=C\C2=CC=C(C=C2)OC3CCN(C3C(=O)N1)C(=O)C(C(C)CC)NC(=O)C(CC4=CC=CC=C4)N(C)C
C1=C2C3=C(C(=C1O)O)OC(=O)C4=CC(=C(C(=C43)OC2=O)O)O[C@H]5[C@@H]([C@H]([C@@H]([C@H](O5)CO[C@H]6[C@@H]([C@H]([C@@H]([C@H](O6)CO)O)O)O)O)O)O
C[C@@]1([C@H]2CN3CCC4=C([C@@H]3C[C@@H]2[C@H](CO1)C(=O)OC)NC5=CC=CC=C45)O
C1C(C(OC2=CC(=CC(=C21)O)O)C3=CC(=C4C(=C3)C5=C(C(=C(C=C5C(=O)O4)O)O)O)O)O
CC(C)(CCC1=C(C=C(C2=C1OC(=C(C2=O)O)C3=CC=C(C=C3)O)O)O[C@H]4C([C@H]([C@@H](C(O4)CO)O)O)O)O
C1=CC(=CC=C1/C=C\C2=C3[C@@H]([C@H](OC3=CC4=C2[C@H]([C@@H](O4)C5=CC=C(C=C5)O)C6=CC(=CC(=C6)O)O)C7=CC=C(C=C7)O)C8=CC(=CC(=C8)O)O)O
CN1C[C@@H]2C3=CC(=C(C=C3C[C@H]1C4=CC5=C(C=C24)OCO5)OC)O
C1=CC(=CC=C1[C@@H]2[C@@H]3[C@H](C4=C(C=C(C=C4[C@H]5[C@H](OC6=CC(=C([C@H]2C7=CC(=CC(=C7)O)O)C3=C56)O)C8=CC=C(C=C8)O)O)O)C9=CC=C(C=C9)O)O
CN1CC[C@]23C=C(C(=O)C=C2[C@H]1CC4=CC5=C(C=C34)OCO5)OC
[HH].CC.CC.CC1=CC=CC=C1.COCC1C(C(C(C(O1)COCC2C(C(C(C(O2)CO)O)O)O)O)O)O.C#N
CCCCCOC(=O)C
CCCCCOC(=O)CCC
C1CC[NH2+]C(C1)C2=CN=CC=C2
C[C@H]1[C@@H]2CC[C@]([C@@H]3[C@H]4[C@H]5C[C@]6([C@@]7([C@H]4C(=C3[C@H]2OC1=O)C)[C@@H]5[C@@](O6)(CC[C@@H]8[C@@H]7OC(=O)[C@H]8C)C)C)(C)O
C1CCN2C[C@H]3C[C@@H]([C@H]2C1)CN4C3=CC=CC4=O
CC(=CCC1=C(C2=C(C3=C1OC(C=C3)(C)C)OC4=C(C2=O)C=CC=C4O)O)C
C/C=C(\C)/C(=O)O[C@@H]1[C@H]([C@H]([C@H](C2=CC3=C(C(=C2C4=C(C(=C(C=C14)OC)OC)OC)OC)OCO3)O)C)C
[3H]C1=CC(=CN=C1)C2CC=CCN2
C[C@H]1CC2=CC(=C(C(=C2C(=N1)C)OC)C3=C(C=C4C=CC=C(C4=C3O)OC)C)OC
CC1CC2=C(C(=CC(=C2C(N1)C)OC)O)C3=C4C=CC=C(C4=C(C=C3C)OC)OC
C[C@@H]1CC2=CC(=C(C(=C2C(=N1)C)OC)C3=C4C=CC=C(C4=C(C=C3C)OC)OC)OC
C[C@H]1CC2=CC(=O)C(=C(C2=C(N1)C)OC)C3=C(C=C4C=CC=C(C4=C3O)OC)C
C[C@H]1CC2=C(C(=O)C=C(C2=C(N1)C)OC)C3=C4C=C(C=C(C4=C(C=C3)OC)O)C
CC1CC2=CC(=C(C(=C2C(N1C)C)OC)C3=C(C=C4C=CC=C(C4=C3O)OC)C)O
C[C@]1(CCC[C@@]2([C@@H]1CCC(=C)[C@H]2CCC3=CCOC3=O)C)CO
CCCCCCCCCCCCCCCCCCCCCCCCCCCCCCCCCCCCCCCC
COC1=C(C2=C(C(=O)CC(O2)C3=CC=CC=C3)C(=C1)O[C@H]4[C@@H]([C@H]([C@@H]([C@H](O4)CO)O)O)O)OC
COC1=C(C2=C(C(=C1)O)C(=O)C=C(O2)C3=C(C(=CC=C3)O[C@H]4[C@@H]([C@H]([C@@H]([C@H](O4)CO)O)O)O)O)OC
COC1=C(C2=C(C(=C1)O[C@H]3[C@@H]([C@H]([C@@H]([C@H](O3)CO)O)O)O)C(=O)C=C(O2)C4=CC=CC=C4)OC
COC1=CC=CC(=C1OC)C2=CC(=O)C3=C(O2)C(=C(C=C3O[C@H]4[C@@H]([C@H]([C@@H]([C@H](O4)CO)O)O)O)OC)OC
COC1=CC=CC=C1C2=CC(=O)C3=C(O2)C(=C(C=C3O[C@H]4[C@@H]([C@H]([C@@H]([C@H](O4)CO)O)O)O)OC)OC
COC1=CC=CC=C1C2=CC(=O)C3=C(O2)C(=C(C=C3O)OC)OC
C[C@@]12CC[C@H]([C@@]([C@H]1CCC(=C)[C@H]2C/C=C/3\[C@@H](COC3=O)O)(C)CO[C@H]4[C@@H]([C@H]([C@@H]([C@H](O4)CO)O)O)O)O
C[C@@]12CC[C@H]([C@@]([C@H]1CCC(=C)C2/C=C/C3[C@@H](COC3=O)O)(C)CO)O
CC(=O)O[C@@H]1[C@H]2CC[C@@H]3[C@]1(C[C@H]([C@]4([C@H]([C@]3(C)O)C[C@@H](C4(C)C)O)O)O)C[C@@]2(C)O
CC(=O)C1=CC(=C(C=C1)OC2[C@@H]([C@H]([C@@H]([C@H](O2)CO)O)O)O)OC
C[C@]12CCC(=O)C=C1CCC3[C@@H]2CC[C@]4([C@H]3CCC4=O)C
C[C@]12CCC3C([C@@H]1CCC2=O)CCC4[C@@]3(CC[C@H](C4)O)C
CC1=C(OC2C1C3(CCC4C(C3C2)CCC5C4(CCC(C5)O[C@H]6[C@@H]([C@H]([C@H]([C@H](O6)CO)O)O)O[C@H]7[C@@H]([C@H]([C@@H]([C@H](O7)CO)O)O)O)C)C)CCC(C)CO[C@H]8[C@@H]([C@H]([C@@H]([C@H](O8)CO)O)O)O
CC1C2C(CC3[C@@]2(CCC4C3CC[C@H]5[C@@]4(CC[C@@H](C5)O[C@H]6[C@@H]([C@H]([C@H]([C@H](O6)CO)O)O)O[C@H]7[C@@H]([C@H]([C@@H]([C@H](O7)CO)O)O)O)C)C)OC1(CC[C@H](C)CO[C@H]8[C@@H]([C@H]([C@@H]([C@H](O8)CO)O)O)O)OC
C[C@@H]1CC[C@@]2([C@H](C3[C@@H](O2)CC4[C@@]3(CCC5C4CC=C6[C@@]5(C[C@H]([C@@H](C6)O[C@H]7[C@@H]([C@H]([C@H]([C@H](O7)CO)O[C@H]8[C@@H]([C@H]([C@@H]([C@H](O8)CO)O)O[C@H]9[C@@H]([C@H]([C@@H](CO9)O)O)O)O[C@H]2[C@@H]([C@H]([C@@H]([C@H](O2)CO)O)O)O)O)O)O)C)C)C)OC1
C1C[C@@]2([C@@]13C=CC(=O)O3)C=CC(=O)O2
CC(=C)[C@@H]1CC[C@]2([C@H]1[C@H]3CC[C@@H]4[C@]5(CC[C@H]([C@@]([C@@H]5CC[C@]4([C@@]3(CC2)C)C)(C)CO)O)C)C(=O)O
C[C@H]1[C@@H]([C@H]([C@H]([C@@H](O1)OC2CCC3(C([C@]2(C)CO)CCC4(C3CCC5[C@]4(CCC6(C5C(CC6)C(=C)C)C(=O)O)C)C)C)O[C@H]7[C@@H]([C@H]([C@@H](CO7)O)O)O)O)O
C[C@H]1[C@H]([C@H]([C@H]([C@@H](O1)OC2CCC3(C([C@]2(C)CO)CCC4(C3CCC5[C@]4(CCC6(C5C(CC6)C(=C)C)C(=O)O[C@H]7[C@@H]([C@@H]([C@H]([C@@H](O7)C)O[C@H]8[C@@H]([C@H]([C@@H]([C@H](O8)CO[C@H]9[C@@H]([C@H]([C@@H]([C@H](O9)CO)O)O)O)O)O)O)O)O)C)C)C)O[C@H]1[C@@H]([C@H]([C@H](CO1)O)O)O)O)O
C/C=C\C1=CC=C(C=C1)OC
COC1=C(C=C2C=CC(=O)OC2=C1)C=O
CCC/C=C\1/C2=C([C@@H]3[C@H](CC2)[C@@H]([C@@]34C5=C(C=CCC5)C(=O)O4)CCC)C(=O)O1
CC[C@@H](CC[C@@H](C)[C@H]1CC[C@@H]2[C@@]1(CC[C@H]3[C@H]2CC=C4[C@@]3(CC[C@@H](C4)O)C)C)C(C)C
CC(=CC(=O)C1=C(C=C(C2=C1OC(=O)C=C2)OC)OC)C
C/C=C(/C)\C(=O)OCC1=CC(=O)C2=C(C3=C(C=C2O1)OC(C3)C(C)(C)O)O
C/C=C(/C)\C(=O)O[C@H](C1=C(C=C2C(=C1)C=CC(=O)O2)OC)[C@H](C(C)(C)O)O
C/C=C(\C)/C(=O)O[C@H](C1=C(C=C2C(=C1)C=CC(=O)O2)OC)[C@H](C(C)(C)O)O
C/C=C(/C)\C(=O)O[C@@H]1[C@@H]2[C@@H]([C@@H]3[C@@H](C=C[C@@]3(C)OO)[C@]([C@@H]1OC(=O)C)(C)O)OC(=O)C2=C
C/C=C(\C)/C(=O)O[C@H]1C2=CC(=C(C(=C2C3=C(C(=C(C=C3C[C@@H]([C@]1(C)O)C)OC)OC)OC)OC)OC)OC
C/C=C(/C)\C(=O)OC1C(C(CC2=CC(=C(C(=C2C3=C(C4=C(C=C13)OCO4)OC)OC)OC)OC)C)C
C/C=C(\C)/C(=O)OCC1=CCN2C1[C@@H](CC2)O
C/C=C(\C)/C(=O)O[C@H]1C(C(CC2C1([C@@H](C[C@@]3(C2=CCC4C3(CC[C@@H]5C4(CCC([C@@]5(C)CO)O)C)C)C)O)CO)(C)C)O
C/C=C(\C)/C(=O)O[C@H]1C(C(CC2C1([C@@H](C[C@@]3(C2=CCC4C3(CC[C@@H]5C4(CCC(C5(C)C)O)C)C)C)O)CO)(C)C)O
C/C=C(\C)/C(=O)O[C@H]1C(C(CC2C1([C@@H](C[C@@]3(C2=CCC4C3(CC[C@@H]5C4(CCC([C@@]5(C)C=O)O)C)C)C)O)CO)(C)C)O
CC(=C)C1CC2=C(O1)C=CC3=C2OC(=O)C=C3
CC(C1=CC=C(C=C1)OC)C(=O)C2=C(C=C(C=C2)O)O
C[C@H]1[C@H]([C@H]([C@H]([C@@H](O1)O[C@@H]2[C@H]([C@@H](O[C@@H]([C@H]2OC(=O)/C=C/C3=CC(=C(C=C3)O)OC)CO[C@H]4[C@@H]([C@H]([C@H](CO4)O)O)O)OCCC5=CC(=C(C=C5)OC)O)O)O)O)O
C/C=C\1/CC(=C)[C@@](C(=O)OC[C@H]2[C@@H](CN3[C@H]2[C@@H](CC3)OC1=O)O)(C)O
COC1=C(C=CC(=C1)/C=C/C(=O)O[C@H]2[C@H](O[C@H]([C@@H]([C@@H]2O)O)OC3[C@@H]([C@@]4(CCOC(=O)C4=CO3)O)C=C)CO)O
CC1=NC=C2C(=C1)C=C3C4=C(CCN3C2=O)C5=CC=CC=C5N4
C[C@@]12CCC[C@@]3([C@@H]1[C@H](OC2)OC)COC(=O)[C@]45[C@H]3[C@@H](C[C@H](C4)C(=C)C5=O)O
C=CC1=C2C=C3C4=C(CCN3C(=O)C2=CN=C1)C5=CC=CC=C5N4
COC1=C(C=CC(=C1)/C=C/C(=O)O[C@H]2[C@H](O[C@H]([C@@H]([C@@H]2O)O)OC3[C@@H]([C@@]4(CCOC(=O)C4=CO3)O)C5CO5)CO)O
CC(C1=C2C=C3C4=C(CCN3C(=O)C2=CN=C1)C5=CC=CC=C5N4)O
C[C@H](C[C@@H]([C@H](C(=C)C)O)O)C1=C2C[C@@H]([C@H]3[C@]4(CCC(=O)C(C4CC[C@@]3([C@]2(CC1)C)C)(C)C)C)OC(=O)C
C[C@H](C[C@@H]([C@H](C(=C)C)OC(=O)C)O)C1=C2C[C@@H]([C@H]3[C@]4(CCC(=O)C(C4CC[C@@]3([C@]2(CC1)C)C)(C)C)C)O
CC(=CCC(/C=C\C=C(C)C)C1=CC(=O)C2=C(C=CC(=C2C1=O)O)O)C
CC1CC[C@@]2([C@@]3(CC(=O)O[C@@]2(C1=O)[C@@]4([C@]3(CC(=C4C)C(C)C)O)O)C)O
CC1(C(O1)COC2=C(C3=C(C=C2)C(=C4C=COC4=N3)OC)OC)C
C1[C@H]([C@@H]([C@H](O1)[C@H](C=O)O)O)O
COC(C([C@@H]1C(C(CO1)O)O)O)OC
CC1(CCC(O1)(CC(=O)OC)OC(=O)C2C3C4=CC5=C(C=C4CCCN6C3(CCC6)C=C2OC)OCO5)C
CC(=CCC1=C(C=C(C2=C1OC(=C(C2=O)O)C3=CC=C(C=C3)OC)O)O)C
CC(=C)C1C(O1)C/C(=C/COC2=C3C=CC(=O)OC3=CC4=C2C=CO4)/C
COC1=CC=C(C=C1)C=O
C[C@@H]1C[C@H]([C@]2([C@@]13C[C@H]([C@]([C@@]24COC4=O)(C)O)OC(=O)[C@H]3O)O)O
CC12CCC3(C1(CC(=O)O2)C(C4(C3(COC4=O)C)C)O)O
C1CC2CC1CC(C2)OC(=O)C(CO)C3=CC=CC=C3
CN1[C@@H]2CC(C[C@H]1[C@H]3[C@@H]2O3)OC(=O)[C@@](CO)(C4=CC=CC=C4)O
COC1=CC=CC=C1
CNC1=C(C=C(C=C1)C2CCN3C2=NC4=CC=CC=C4C3=O)C(=O)OC
CC[C@H]1CN2CCC3=C(C(=C(C=C3[C@@H]2C[C@@H]1CCO)OC)OC)O
CCC[C@@H]([C@H](CCCCCCCC[C@H]([C@H]1CC[C@@H](O1)CCCCCCCCCC[C@H](CC2=C[C@@H](OC2=O)C)O)O)O)O
CCCCCCCCCCCC/C=C\CC[C@H]([C@H]1CC[C@@H](O1)[C@@H](CCCC(CCCC[C@H](CC2=C[C@@H](OC2=O)C)O)O)O)O
COC1=C(C=C2C(=C1)C=CN=C2[C@H](C3=CC=C(C=C3)O)O)O
COC1=C(C=C2C(=C1)C=CN=C2[C@H](C3=CC=C(C=C3)O)OC)O
C[C@@H]1C[C@]23[C@@H]4CCCN2CCC[C@@H]3[C@@H](C[C@@H]4C1=O)O
CCCCCCCCCC[C@@H]([C@H]1CC[C@@H](O1)[C@H]2CC[C@@H](O2)[C@@H](CCCC[C@@H](CCCCC[C@H](CC3=C[C@@H](OC3=O)C)O)O)O)O
CCCCCCCCCCCCCC[C@@H]([C@@H]1CC[C@H](O1)CCCCC[C@H]([C@@H](CC[C@H](CC2=C[C@@H](OC2=O)C)O)O)O)O
CCCCCCCCCCCC[C@@H]([C@@H]1CC[C@H](O1)[C@H](CC(CCCCC(CCCC(CC2=CC(OC2=O)C)O)O)O)O)O
CCCCCCCCCCCC[C@@H]([C@@H]1CC[C@H](O1)[C@H](CCCCCCC(CCCCC[C@H](CC2=C[C@@H](OC2=O)C)O)O)O)O
C[C@]1(CCC[C@@]2([C@@H]1CC[C@]34[C@H]2CC[C@H](C3)[C@@H](C4)C(=O)OC[C@@]5(C[C@@]67CC[C@@H]8[C@](CCC[C@]8([C@@H]6CC[C@@H]5C7)C)(C)C=O)O)C)C=O
CCCCCCCCCCCC[C@@H]([C@H]1CC[C@@H](O1)[C@@H](CCC[C@H]([C@@H](CCCCC[C@H](CC2=C[C@@H](OC2=O)C)O)O)O)O)O
CCCCCCCCCCCC[C@@H]([C@H]1CC[C@@H](O1)[C@@H](CCC[C@@H]([C@@H](CCCCC[C@H](CC2=C[C@@H](OC2=O)C)O)O)O)O)O
CCCCCCCCCCCC[C@H]([C@H]1CC[C@@H](O1)[C@@H](CCCC[C@@H](CCCCC[C@H](CC2=CC(OC2=O)C)O)O)O)O
CCCCCCCCCCCCC(C1CCC(O1)C(CCCCC(CCCCCC(CC2=CC(OC2=O)C)O)O)O)O
CCCCCCCCCCCC[C@H]([C@H]1CCC(O1)[C@@H](CCCCC(=O)CCCCC[C@H](CC2=C[C@@H](OC2=O)C)O)O)O
CCCCCCCCCCCCC(C1CCC(O1)C(CCCCC(=O)CCCCCC(CC2=CC(OC2=O)C)O)O)O
CCCCCCCCCC[C@@H]([C@H]1CCC(O1)[C@H]2CCC(O2)[C@@H](CCCCCCCCCCCC(C3=CC(OC3=O)C)O)O)O
CCCCCCCCCCC(C1CCC(O1)C2CCC(O2)C(CCCCCCCCCCC(CC3=CC(OC3=O)C)O)O)O
CCCCCCCCCCCC[C@H]([C@@H](CC[C@@H]([C@@H]1CC[C@H](O1)C[C@@H](CCCCC[C@H](CC2=C[C@@H](OC2=O)C)O)O)O)O)O
CCCCCCCCCCCC[C@@H]([C@H](CC[C@@H]([C@@H]1CC[C@H](O1)C[C@@H](CCCCC[C@H](CC2=C[C@@H](OC2=O)C)O)O)O)O)O
CCCCCCCCCCCCC(C(CC[C@@H]([C@@H]1CC[C@H](O1)C[C@@H](CCCCC[C@H](CC2=C[C@@H](OC2=O)C)O)O)O)O)O
CCCCCCCCCCCC[C@@H]([C@@H]1CC[C@H](O1)[C@H](CCCCCC(CCCCC(CC2=CC(OC2=O)C)O)O)O)O
C[C@@]12CCC[C@@]([C@H]1CC[C@]34[C@H]2CC[C@@H](C3)[C@@](C4)(CO)O)(C)O
CC(=O)O[C@]1(C[C@@]23CC[C@H]4[C@]([C@@H]2CC[C@@H]1C3)(CCC[C@@]4(C)O)C)CO
CC12CC34C5CCCN3CC=CC4(C1CC5OC2=O)O
C[C@@H]1C[C@@]23[C@]14[C@@H]5C[C@H]([C@H]2CCCN3C[C@@H]6[C@H]4O6)OC5=O
C[C@@H](CC[C@H]1[C@]2(CC(=O)CC1(C)C)CO2)O
COC1=C(OC2=CC(=CC(=C2C1=O)O)O)C3=CC(=C(C(=C3)O)O)O
COC1=CC(=C(C(=C1)O[C@H]2[C@@H]([C@H]([C@@H](O2)CO)O)O)C(=O)C3=CC(=CC(=C3)O)O)O
COC1=CC=C(C=C1)C2=CN=C(O2)/C=C/C3=CC(=C(C=C3)OC)OC
C1CNC2CC3=C(C=CC(=C3)O)C4=C2C1=CC5=C4OCO5
C/C=C(/C)\C(=O)OC1C(C(OC2=C1C3=C(C=C2)C=CC(=O)O3)(C)C)OC(=O)/C(=C\C)/C
C/C=C(/C)\C(=O)O[C@H]1[C@H](C(OC2=C1C3=C(C=C2)C=CC(=O)O3)(C)C)OC(=O)/C(=C\C)/C
C1CNC2CC3=CC=CC=C3C4=C2C1=CC5=C4OCO5
CC(C)CC(=O)OC(C1=C(C=C2C(=C1)C=CC(=O)O2)OC)C(C(C)(C)O)O
CN1C=NC=C1C[C@H](C(=O)O)NC(=O)CCN
C1[C@H]([C@@H]([C@H]([C@@H](O1)OC[C@@H]2[C@H]([C@@H]([C@H]([C@@H](O2)OC3=CC=C(C=C3)/C=C/C(=O)O[C@@H]4CO[C@H]([C@@H]([C@H]4O)O)OC[C@@H]5[C@H]([C@@H]([C@H]([C@@H](O5)OC(C#N)C6=CC=CC=C6)O)O)O)O)O)O)O)O)O
C1[C@H]([C@@H]([C@H]([C@@H](O1)OC[C@@H]2[C@H]([C@@H]([C@H]([C@@H](O2)OC(C#N)C3=CC=CC=C3)O)O)O)O)O)OC(=O)/C=C/C4=CC=C(C=C4)OC5[C@@H]([C@H]([C@@H]([C@H](O5)CO)O)O)O
CC1=C(C(C[C@@H](C1)O)(C)C)/C=C/C(=C/C=C/C(=C/C=C/C=C(\C)/C=C/C=C(\C)/C=C/[C@@]23[C@@](O2)(C[C@@H](CC3(C)C)O)C)/C)/C
C1=CC2=CC3C(=CC=C4C3=CC=[Ga]4)C=C2C=C1
CC1=CC(=C2C(=C1)C(=O)C3=CC(=CC(=C3C2=O)O)OC)O[C@H]4[C@@H]([C@H]([C@@H]([C@H](O4)CO)O)O)O
CC1=CC(=C2C(=C1)C(=O)C3=CC(=CC(=C3C2=O)O)O)O[C@H]4[C@@H]([C@H]([C@@H]([C@H](O4)CO)O)O)O
CC1=C(C=CC2=C1C(=O)C3=C(C2=O)C=CC(=C3)O)CCC(=O)C
C1=CC=C2C(=C1)C=C3C=CC=CC3=C2O
CCN1C[C@@]2(CCC(C34[C@@H]2[C@@H](C(C31)([C@]5(C[C@@H]([C@H]6C[C@@H]4[C@@H]5[C@H]6OC)OC)O)O)OC)OC)COC(=O)C7=CC=CC=C7N
C1=CC=C2C(=C1)C(=O)C3=CC=CC=C3C2=O
CC(=CCCC1=C(C2=C(C(=C1Cl)O)C(=O)C3=CC=CC=C3C2=O)O)C
CC(CC1=C(C(=O)C2=C3C(=C(C=C2O1)O)C(=O)C=C(O3)C4=CC(=C(C=C4)O)O)O)O
COC1=CC(=CC(=C1OC)OC)[C@H]2[C@@H]3[C@@H](CC4=CC5=C(C=C24)OCO5)COC3=O
C[C@H]1[C@@H]([C@@H]([C@@H]([C@@H](O1)O[C@H]2CC[C@@]3([C@H]4C[C@H]([C@@]5([C@H](CC[C@@]5([C@@H]4CC[C@@]3(C2)O)O)C6=CC(=O)OC6)C)O)C=O)O)O)O
CC12C(CCC1(C3CCC4(CCCCC4(C3CC2O)C=O)O)O)C5=CC(=O)OC5
COC1=C(C(=C(C(=C1)O)C=O)OC)OC
C[C@H]1[C@@H]([C@H]([C@H]([C@@H](O1)O[C@H]2CC[C@@]3([C@H]4C[C@H]([C@@]5([C@H](CC[C@@]5([C@@H]4CC[C@@]3(C2)O)O)C6=CC(=O)OC6)C)O)C)O)O)O
C[C@H](CCC=C(C)C)[C@@H]1CC[C@]2([C@]1(CC[C@@]3([C@@H]2CC=C4[C@@]3(CC[C@@H](C4(C)C)O)C)C)C)C
C[C@H](CCC=C(C)C)C1CC[C@]2([C@]1(CC=C3C2=CC[C@@H]4[C@@]3(CC[C@@H](C4(C)C)O)C)C)C
CC(C)C1CCC2(C1C=C(CCC2O)C=O)C
C1CCN2C[C@H]3C[C@@H]([C@@H]2C1)C(=O)N4[C@@H]3CCCC4
CC[C@H](C)[C@H]1C(=O)N2CCCC[C@@H]2C(=O)N[C@H](C(=O)N[C@H](C(=O)N1)CC3=CN(C4C3C=CC=C4)OC)CCCCCC(=O)CC
C1=CC(=CC=C1C2=CC(=O)C3=C(O2)C=C(C=C3[O-])O)O
C[C@H]1[C@@H]([C@H]([C@H]([C@@H](O1)O[C@@H]2[C@H]([C@@H]([C@H](OC2OC3=CC(=C4C(=C3)OC(=CC4=O)C5=CC=C(C=C5)O)O)CO)O)O)O)O)O
CC1C(C(C(C(O1)OCC2C(C(C(C(O2)OC3=CC(=C4C(=C3)OC(=CC4=O)C5=CC=C(C=C5)O)O)O)O)O)O)O)O
C1[C@](C([C@@H](O1)OC2[C@H]([C@@H](C(O[C@H]2OC3=CC(=C4C(=C3)OC(=CC4=O)C5=CC=C(C=C5)O)O)CO)O)O)O)(CO)O
CC1(C2CCC3(C(C2(CCC1OC4C(C(C(C(O4)C(=O)O)O)O)OC5C(C(CO5)(CO)O)O)C)C(=O)C=C6C3(CCC7(C6CC(CC7)(C)C(=O)O)C)C)C)C
COC1=C2C(=C(C(=C1)CC=C)OC)OCO2
C(C(CO)([C@H](C=O)O)O)O
C1[C@@]([C@H]([C@@H](O1)OC[C@@H]2[C@H]([C@@H]([C@H]([C@@H](O2)OC3=CC4=C(C=C3)C=CC(=O)O4)O)O)O)O)(CO)O
CC/C=C\C/C=C\C/C=C\CCCCCC=C
CN1C2CCC1CC(C2)OC(=O)C(=C)C3=CC=CC=C3.Br
CN1[C@@H]2CC(CC1[C@H]3[C@@H]2O3)OC(=O)C(=C)C4=CC=CC=C4
CC1(C2C3C(C4(C5(CO5)C6C(C4(C2C(=O)O3)O1)O6)C)O)C
CC(C)([C@@H]1[C@@H](C2=C(O1)C=CC3=C2OC(=O)C=C3)O)OC4C(C(C(C(O4)CO)O)O)O
C([C@H](C([C@@H](CO)O)O)O)O
CC1(C2CCC3(C(C2(CCC1OC4C(C(C(C(O4)C(=O)O)O)O)OC5C(C(C(CO5)O)O)O)C)C(=O)C=C6C3(CCC7(C6CC(CC7)(C)C(=O)O)C)C)C)C
COC1=C(C=CC(=C1)[C@@H]2[C@@H](CC3=C(C=C(C=C3O2)O)O)O)O
C[C@@]12CCC3(CCC(CC3C1=CCC4C2(CCC5C4(CCC(C5(C)C)O[C@H]6[C@@H]([C@H]([C@@H]([C@H](O6)CO)O)O[C@H]7[C@@H]([C@H]([C@@H]([C@H](O7)CO)O)O)O)O[C@H]8[C@@H]([C@H]([C@@H]([C@H](O8)CO)O)O)O)C)C)(C)C)C(=O)O[C@H]9[C@@H]([C@H]([C@@H]([C@H](O9)CO)O)O)O
C[C@@]12C[C@H](C3(CCC(CC3C1=CCC4C2(CCC5C4(CCC(C5(C)C)O[C@H]6[C@@H]([C@H]([C@@H]([C@H](O6)CO)O)O[C@H]7[C@@H]([C@H]([C@@H]([C@H](O7)CO)O)O)O)O[C@H]8[C@@H]([C@H]([C@@H]([C@H](O8)CO)O)O)O)C)C)(C)C)C(=O)O[C@H]9[C@@H]([C@H]([C@@H]([C@H](O9)CO)O)O)O)O
C[C@@]12CCC3(CCC(CC3C1=CCC4C2(CCC5C4(CCC([C@@]5(C)CO)O[C@H]6[C@@H]([C@H]([C@@H]([C@H](O6)CO)O)O[C@H]7[C@@H]([C@H]([C@@H]([C@H](O7)CO)O)O)O)O[C@H]8[C@@H]([C@H]([C@@H]([C@H](O8)CO)O)O)O)C)C)(C)C)C(=O)O[C@H]9[C@@H]([C@H]([C@@H]([C@H](O9)CO)O)O)O
C[C@@]12C[C@H](C3(CCC(CC3C1=CCC4C2(CCC5C4(CCC([C@@]5(C)CO)O[C@H]6[C@@H]([C@H]([C@@H]([C@H](O6)CO)O)O[C@H]7[C@@H]([C@H]([C@@H]([C@H](O7)CO)O)O[C@H]8[C@@H]([C@H]([C@@H]([C@H](O8)CO)O)O)O)O)O[C@H]9[C@@H]([C@H]([C@@H]([C@H](O9)CO)O)O)O)C)C)(C)C)C(=O)O[C@H]1[C@@H]([C@H]([C@@H]([C@H](O1)CO)O)O)O)O
CC1(CCC2(CCC3(C(=CCC4C3(CCC5C4(CCC(C5(C)CO)O[C@H]6[C@@H]([C@H]([C@@H](CO6)O)O[C@H]7[C@@H]([C@H]([C@@H]([C@H](O7)CO)O)O)O)O[C@H]8[C@@H]([C@H]([C@@H]([C@H](O8)CO)O)O)O)C)C)C2C1)C)C(=O)O[C@H]9[C@@H]([C@H]([C@@H]([C@H](O9)CO)O)O)O)C
C[C@]12CC[C@@H](C([C@@H]1CC[C@@]3([C@@H]2CC=C4[C@]3(CC[C@@]5(C4CC(CC5)(C)C)C(=O)O[C@H]6[C@@H]([C@H]([C@H]([C@H](O6)CO)O)O)O)C)C)(C)C)O[C@H]7[C@@H]([C@H]([C@@H]([C@H](O7)C(=O)O)O[C@H]8[C@@H]([C@H]([C@@H](O8)CO)O)O)O)O
CC1(CCC2(CCC3(C(=CCC4C3(CCC5C4(CCC(C5(C)C)O[C@H]6[C@@H]([C@H]([C@@H]([C@H](O6)C(=O)O)O[C@H]7[C@@H]([C@H]([C@@H](O7)CO)O)O)O[C@H]8[C@@H]([C@H]([C@@H](O8)CO)O)O)O)C)C)C2C1)C)C(=O)O[C@@H]9[C@@H]([C@H]([C@@H]([C@H](O9)CO)O)O)O)C
C[C@]12CC[C@@H](C(C1CC[C@@]3(C2CC=C4[C@]3(CC[C@@]5(C4CC(CC5)(C)C)C(=O)O[C@H]6[C@@H]([C@H]([C@H](CO6)O)O)O[C@H]7[C@@H]([C@H]([C@@H](CO7)O)O)O[C@H]8[C@@H]([C@H]([C@@H]([C@H](O8)CO)O)O)O)C)C)(C)C)O
C[C@@H](O)/C=C/C(=C/C(=O)NCC(C(=O)C(CNC(=O)/C=C(/C=C/[C@@H](O)C)\C)(C)C)(C)C)/C
CN1C2=CC=CC=C2C(=O)N=C1CC3=CC=CC=C3
CN1C2=CC=CC=C2C(=O)C3=C(C(=C(C=C31)OC)OC)O
CC(C)[C@@H]1CCC2[C@]1(CCC3([C@@]2(CC=C4[C@H]3CCC5[C@@]4(CCC(=O)C5(C)C)C)C)C)C
C[C@]12CCC[C@@]([C@@H]1[C@@H]3C(CC2)C(=C)C(=O)O3)(C)O
C1=CC(=CC=C1O)O[C@H]2[C@@H]([C@@H]([C@@H]([C@H](O2)CO)O)O)O
C/C=C(\C)/C(=O)OC(C)(C)C1[C@@H](C2=C(O1)C=CC3=C2OC(=O)C=C3)OC(=O)C=C(C)C
COC1=C(C=C(C=C1)CC2COC(=O)C2CC3=CC(=C(C=C3)O)OC)OC
COC1=C(C=C(C=C1)CC2COC(=O)C2CC3=CC(=C(C=C3)O[C@H]4[C@@H]([C@H]([C@@H]([C@H](O4)CO[C@H]5[C@@H]([C@H]([C@@H]([C@H](O5)CO)O)O)O)O)O)O)OC)OC
CC1C(C(C(C(O1)CO)O)O)O.COC1=C(C=C(C=C1)CC2COC(=O)C2CC3=CC(=C(C=C3)O)OC)OC
C1=CC=C2C(=C1)C3=C4C(=C5C6=CC=CC=C6NC5=C3N2)C(=O)NC4=O
C[C@H]1[C@@H]([C@H]([C@H]([C@@H](O1)O[C@@H]2[C@H]([C@@H]([C@H](O[C@H]2O[C@H]3[C@H](CO[C@H]([C@@H]3O[C@H]4[C@@H]([C@H]([C@@H]([C@H](O4)CO)O)O)O)OC5CCC6(C(C5(C)C)CCC7(C6CCC89C7(CC(C1(C8CC(CC1)(C)C=O)CO9)O)C)C)C)O)CO)O)O)O)O)O
C[C@]1(CCC23COC4([C@H]2C1)CC[C@@H]5[C@]6(CC[C@@H](C(C6CC[C@]5([C@@]4(C[C@H]3O)C)C)(C)C)O[C@H]7[C@@H]([C@H]([C@H](CO7)O[C@@H]8[C@@H]([C@H]([C@@H]([C@H](O8)CO)O)O)O)O[C@@H]9[C@@H]([C@H]([C@@H]([C@H](O9)CO)O)O)O)O[C@H]1[C@@H]([C@H]([C@@H]([C@H](O1)CO)O)O)O[C@H]1[C@@H]([C@H]([C@@H](CO1)O)O)O)C)C=O
CCCCCCCCCCCCCC(CC1=CC(=O)C=C(C1=O)OC)OC(=O)C
COC1=CC(=O)C(=C(C1=O)CCCCCCC/C=C/CCCCCCCC2=C(C(=O)C=C(C2=O)OC)O)O
CC1=C(C(=O)C(=C(C1=O)OC(=O)C)CCCCCCCCCCCCCC2=C(C(=O)C(=C(C2=O)OC(=O)C)C)O)O
CCCC/C=C\CCCCCCCC1=CC(=C(C(=C1)O)C)O
CCCC/C=C\CCCCCCCC1=CC(=CC(=C1)O)O
CC(=O)OC1=CC=CC(=C1CCCCCCCCCCC(=O)C2=C(C=C(C=C2O)OC)O)O
COC1=CC(=C(C(=C1)O)C(=O)CCCCCCCCCCC2=C(C=CC=C2O)O)O
CN1CCC=C(C1)C(=O)O
CN1CC(=C(C=C1)OC)OC
CN1CCC=C(C1)C(=O)OC.Br
CC(=O)C1=NC=CC2=C1NC3=C2C=CC(=C3)OC
C[C@H]1[C@@H]([C@H]([C@H](C(O1)O[C@@H]2[C@H]([C@@H](O[C@@H]([C@H]2OC(=O)/C=C/C3=CC(=C(C=C3)O)O)CO[C@H]4[C@@H]([C@H]([C@@H](CO4)O)O)O)OCCC5=CC(=C(C=C5)O)O)O)O)O)O
C[C@]12CC[C@@H](C[C@H]1CC[C@@H]3[C@@H]2[C@@H](C(=O)[C@]4([C@@]3(CC[C@@H]4C5=COC(=O)C=C5)O)C)O)O
C[C@@H]1CC[C@@H](O[C@@H]2[C@H]1[C@]3(CCC4=C([C@@]3(C2)C)CCC5[C@@]4(CC[C@H](C5(C)C)O)C)C)C(C)C
C[C@@H]1C=C[C@@H](O[C@@H]2[C@H]1[C@]3(C=C[C@@]45C[C@@]46C=CC(=O)C(C6CCC5[C@@]3(C2)C)(C)C)C)C(C)(C)O
CC(=C)C(CCC(=C)C1[C@H](C[C@@]2([C@@]1(CC[C@]34C2CCC5[C@]3(C4)CCC(=O)C5(C)C)C)C)OC(=O)C)OC(=O)C
CC(CCC(C(=C)C)OC(=O)C)C1[C@H](C[C@@]2([C@@]1(CC[C@]34C2CCC5[C@]3(C4)CCC(=O)C5(C)C)C)C)OC(=O)C
C1C2CN(CC1C3=CC=CC(=O)N3C2)C(=O)N4CC5CC(C4)C6=CC=CC(=O)N6C5
CC(=O)NC(=O)[C@H](CCCN=C(N)N)NC(=O)[C@H](CCCN=C(N)N)NC(=O)[C@H](CCCN=C(N)N)NC(=O)[C@H](CCCN=C(N)N)NC(=O)[C@H](CCCN=C(N)N)NC(=O)[C@H](CCCN=C(N)N)NC(=O)[C@H](CCCN=C(N)N)NC(=O)[C@H](CCCN=C(N)N)NC(=O)[C@H](CCCN=C(N)N)O
C1[C@H]([C@H]([C@@H]([C@](O1)(CNC(CCCN=C(N)N)C(=O)O)O)O)O[C@H]2[C@@H]([C@H]([C@@H]([C@H](O2)CO)O)O)O)O
CC1=CC[C@]23[C@H]1[C@@H]4[C@@H](CC[C@]2(O3)C)C(=C)C(=O)O4
C[C@@H]1CCC2=C1C=NC=C2/C=C/C(=O)C
C[C@@H]1CCC2=C1C=NC=C2C(=O)N
CCOCC1=C(C(=O)C(=CO1)O)O
CCCCCCCCCCCC[C@H]([C@H]1CC[C@@H](O1)[C@@H](CC[C@H](CCCCCCC[C@H](CC2=C[C@@H](OC2=O)C)O)O)O)O
COC1=CC2=C(C=C1)NC3=C2CCN4C3CC5C(C4)COC=C5C(=O)OC
COC1=CC(=CC(=C1O)OC)/C=C/C(=O)OC[C@@H]2[C@H]([C@@H]([C@H]([C@H](O2)O[C@]3([C@H]([C@@H]([C@@H](O3)CO)O)OC(=O)/C=C/C4=CC(=C(C=C4)O)OC)CO)O)O)O
COC1=CC(=CC(=C1O)OC)/C=C/C(=O)OC[C@@H]2[C@H]([C@@H]([C@H]([C@H](O2)O[C@]3([C@H]([C@@H]([C@@H](O3)CO)O)O)CO)O)O)O
COC1=C(C=CC(=C1)/C=C/C(=O)OC[C@@H]2[C@H]([C@@H]([C@H]([C@H](O2)OC3(C(C(C(O3)CO)O)O)CO)O)O)O)O
COC1=C(C=CC(=C1)/C=C/C(=O)OC[C@@H]2[C@H]([C@@H](C[C@@H](O2)O[C@]3([C@H]([C@@H]([C@H](O3)CO)O)O)CO)O)O[C@H]4[C@@H]([C@H]([C@@H]([C@H](O4)CO)O)O)O)O
COC1=CC(=CC(=C1O)OC)/C=C/C(=O)OC[C@@H]2[C@H]([C@@H](C[C@@H](O2)O[C@]3([C@H]([C@@H]([C@H](O3)CO)O)O)CO)O)O[C@H]4[C@@H]([C@H]([C@@H]([C@H](O4)CO)O)O)O
COC1=C(C=CC(=C1)/C=C/C(=O)O[C@H]2[C@@H]([C@H](O[C@@]2(CO)O[C@H]3C[C@H]([C@@H]([C@H](O3)CO)O[C@H]4[C@@H]([C@H]([C@@H]([C@H](O4)CO)O)O)O)O)CO)O)O
COC1=CC(=C(C=C1/C=C/C(=O)O[C@H]2[C@@H]([C@H](O[C@@]2(CO)O[C@H]3C[C@H]([C@@H]([C@H](O3)CO)O[C@H]4[C@@H]([C@H]([C@@H]([C@H](O4)CO)O)O)O)O)CO)O)OC)O
COC1=C(C2=C(C(=C1)C(=O)OC)C(=CC3=CC=CC=C32)[N+](=O)[O-])OC
COC1=C(C=C2C3=C1C4=CC=CC=C4C=C3NC2=O)O
COC1=CC=CC2=C3C4=C(C=C21)NC(=O)C4=CC5=C3OCO5
C1OC2=C(O1)C3=C4C(=C2)C(=O)NC4=CC5=CC=CC=C53
CC1CC(=O)C=C2C1([C@H]3[C@H](C3(C)C)CC2)C
CC1=C2C(=C(C=C1)O)C(=C(C(=O)C2=O)C)O
C[C@@H]1CCCC2=CC(=O)C3C([C@@]12C)C3(C)C
COC1=CC=CC2=C3C4=C(C(=C21)O)OC(=O)C4=CC5=C3OCO5
COC1=CC(=CC2=C3C(=C(C=C12)[N+](=O)[O-])C(=CC4=C3OCO4)C(=O)O)O[C@H]5[C@@H]([C@H]([C@@H]([C@H](O5)CO)O)O)O
C/C/1=C\CC/C(=C\[C@@H](C/C(=C/CC1)/C)OC(=O)C2=CC3=C(C4=C5C=CC=C(C5=CC(=C24)[N+](=O)[O-])OC)OCO3)/C=O
C[C@@H](CC1=CCC[C@]([C@@H]1C(=C)C=O)(C)C=C)OC(=O)C2=CC3=C(C4=C5C=CC=C(C5=CC(=C24)[N+](=O)[O-])OC)OCO3
CC1([C@H]2C[C@@H]1C3=C(C2)O[C@@]4(CC3)[C@H]5C[C@H](C5(C)C)CC4=O)C
C[C@@]12CC[C@@H]3[C@@]([C@H]1CC=C4[C@]2(CC[C@@]5([C@H]4[C@@H](C(CC5)(C)C)O)C(=O)O)C)(C[C@H]([C@@H]([C@@]3(C)CO)O)O)C
C[C@@]12CC[C@@H]3[C@@]([C@H]1CC=C4[C@]2(CC[C@@]5([C@H]4C(C(CC5)(C)C)O)C(=O)O[C@H]6[C@@H]([C@H]([C@@H]([C@H](O6)CO)O)O)O)C)(C[C@H]([C@@H]([C@@]3(C)CO)O)O)C
COC1=CC=C(C=C1)CCNC(=O)/C=C/C2=CC3=C(C=C2)OCO3
CN1CCC2=CC(=C(C=C2[C@@H]1CC3=CC=C(C=C3)O)OC)OC
CC1=CC(=CC(=C1C(=O)O[C@@H]2CC3(C2(C(=CC4(C3CC(C4)(C)C)O)C=O)O)C)O)OC
CC1=C(C(=CC(=C1Cl)OC)O)C(=O)O[C@@H]2CC3(C2(C(=CC4(C3CC(C4)(C)C)O)C=O)O)C
CC1=CC(=CC(=C1C(=O)O[C@@H]2CC3(C2C(=C[C@]4(C3CC(C4)(C)C)O)C=O)C)O)OC
CC(=O)C1=CC2=C(C=C(C=C2CO)O)OC1=O
C/C(=C\CCC1=COC=C1)/CC2=CC(=O)C(=C(C2=O)OC)OC
CC(=CCC(C1=CC(=O)C2=C(C=CC(=C2C1=O)O)O)C(=O)OC=C(C)C)C
C/C/1=C/CC2=C(C=CC(=C2)OC/C(=C\CC1)/C)O
CC(=C)C1CCC(C2=C1C(=O)C(=C(C2=O)OC)OC)(C)C=C
C[C@@H]1C[C@@H]2[C@@H]([C@@H](C(=O)O2)C)[C@@H]([C@]3([C@H]1C=CC3=O)C)OC(=O)C
CC1C2[C@H]3C(CC4[C@]5(CC[C@@H](C(C5CC[C@]4(C3(CC[C@]2(CCC1=C)C)C)C)(C)C)O)C)O
C[C@@H]1CC[C@@H]2[C@@H]1[C@H]3[C@H](C3(C)C)CCC2=C
COC1=CC(=C2C(=C1)OC(C(C2=O)O)C3=CC=C(C=C3)O)O
C[C@@H]1C[C@H]2[C@H](C[C@]3([C@H]1C=CC3=O)C)C(=C)C(=O)O2
CN1CCC2=CC(=C3C=C2[C@@H]1CC4=CC(=C(C=C4)O)OC5=CC=C(C[C@@H]6C7=CC(=C(C(=C7CCN6C)OC)O)O3)C=C5)OC
CN1CCC2=CC(=C(C3=C2C1CC4=CC=C(C=C4)OC5=C(C=CC(=C5)CC6C7=CC(=C(C=C7CCN6C)OC)O3)O)O)OC
C=C(CO)[C@H](CO)O
C1=CC2=C(C=C1/C=C/CO)OC([C@H](O2)CO)C3=CC4=C(C=C3)OC([C@H](O4)CO)C5=CC(=C(C=C5)O)O
CC1[C@@H](C([C@@H]([C@@H](O1)O[C@@H]2[C@@H](O[C@H](C2O)CO)OC3=C(OC4=CC(=CC(=C4C3=O)O)O)C5=CC(=C(C=C5)O)O)O)O)O
CC1[C@@H](C([C@@H]([C@@H](O1)O[C@@H]2[C@@H](O[C@H](C2O)CO)OC3=C(OC4=CC(=CC(=C4C3=O)O)O)C5=CC=C(C=C5)O)O)O)O
C[C@H]1[C@@H]2CC[C@](C3=CCC(=C3[C@H]2OC1=O)C)(C)O
CC1CCC2C3C1CC=C(C3OC2=O)C
C[C@@H]1CCC2[C@H](C(=O)OC3[C@@]24C1CC[C@](O3)(OO4)C)C
C[C@@H]1CC[C@H]2C(=C)C(=O)O[C@]23[C@H]1CC[C@@]4([C@H]3O4)C
COC1=CC(=CC(=C1OC)OC)C2=CC(=O)C3=C(C(=C(C=C3O2)O)OC)O
CC1=C2C[C@@H]3[C@]([C@@H]2[C@@H]4[C@@H]([C@H](C1)OC(=O)C)C(=C)C(=O)O4)(O3)C
COC1=C(C=C(C=C1)C2=C(C(=O)C3=C(C(=C(C=C3O2)OC)OC)O)OC)OC
CC(=C[C@H](C(C)(C)C=C)O)C
CC(=CC(=O)C(C)(C)C=C)C
CC(=C)/C=C/C(C)(C)C=C
CC1C2C(CC3(C=CC(=O)C(=C3C2OC1=O)C)C)O
CC1CCC2C(CCC(C2C1)C(C)CO)C
C[C@@H]1CC[C@H]2C(=C)C(=O)OC3[C@@]24[C@H]1CC[C@](O3)(OO4)C
CC(=CCC1=CC(=CC(=C1O)CC=C(C)C)/C=C/C(=O)O)C
CC(=CCC1=C(C=C2C(=C1O)C(=O)C=C(O2)C3=C(C=C(C=C3)O)O)O)C
CC(=CC1C2=C(C3=C(O1)C=C(C=C3)OC)OC4=C5C=CC(OC5=CC(=C4C2=O)O)(C)C)C
CC(=CCC/C(=C/CC1=C(OC2=C(C1=O)C(=C(C3=C2C=CC(O3)(C)C)CC=C(C)C)O)C4=C(C=C(C=C4)O)O)/C)C
CC(=CCCC1(C=CC2=C3C(=C(C=C2O1)O)C(=O)C4=C(O3)C5=C(C=C(C=C5)O)O[C@@H](C4)C(C)(C)O)C)C
CC(=CCC/C(=C/CC1=C(OC2=C(C1=O)C(=CC(=C2CC=C(C)C)O)O)C3=C(C=C(C=C3)O)O)/C)C
CC(=CCC1=C(OC2=CC(=CC(=C2C1=O)O)OC)C3=CC(=C(C=C3O)OC)O)C
CC(=CCC1=C(OC2=CC(=CC(=C2C1=O)O)O)C3=CC(=C(C=C3OC)OC)O)C
CC(=C)C1CC2=C(C3=C1C(=C(C=C3O)OC)O)OC4=CC(=CC(=C4C2=O)O)OC
CC(=C)C1CC2=C(C3=C1C(=C(C=C3O)OC)O)OC4=CC(=CC(=C4C2=O)O)O
CC(=CCC1=C(C(=C(C=C1O)O)CC=C(C)C)C2=CC3=C(O2)C4=C(C=C3)OC(C=C4)(C)C)C
CC(=CCC1=C2C(=C(C3=C1OC4=C(C3=O)CC5C6=C4C(=CC(=C6OC5(C)C)O)O)O)C=CC(O2)(C)C)C
CC(C)[C@H]1CC[C@@H]2[C@@]1(CC[C@]3([C@]2(CC=C4[C@@H]3CC[C@@H]5[C@@]4(CC[C@@H](C5(C)C)OC)C)C)C)C
CC(=O)OC(C)(C)/C=C/C(=O)[C@@](C)([C@H]1[C@@H](C[C@@]2([C@@]1(CC(=O)[C@@]3([C@H]2CC=C4[C@H]3C[C@H](C(=O)C4(C)C)O[C@H]5[C@@H]([C@H]([C@@H]([C@H](O5)CO)O)O)O)C)C)C)O)O
CC1(C2=CCC3C4(CC(C(C4(CC(=O)C3(C2CC(C1=O)OC5C(C(C(C(O5)CO)O)O)O)C)C)C(C)(C(=O)C=CC(C)(C)O)O)O)C)C
C[C@]12CC[C@@H](C([C@@H]1CC[C@@]3([C@@H]2CC=C4[C@]3(CC[C@@]5([C@H]4CC(CC5)(C)C)C(=O)O[C@H]6[C@@H]([C@H]([C@@H]([C@H](O6)CO)O)O)O)C)C)(C)C)O[C@H]7[C@@H]([C@H]([C@@H]([C@H](O7)CO)O)O[C@H]8[C@@H]([C@H]([C@H]([C@H](O8)CO)O)O)O)O
CC1CCC2(C(C3C(O2)CC4C3(CCC5C4CCC6C5(CCC(C6)O[C@H]7[C@@H]([C@H]([C@@H]([C@H](O7)CO)O)O)O[C@H]8[C@@H]([C@H]([C@@H](CO8)O[C@H]9[C@@H]([C@H]([C@@H]([C@H](O9)CO)O)O)O)O)O)C)C)C)OC1
C[C@H]1[C@@H]([C@H]([C@H]([C@@H](O1)OC2CCC3(C(C2)CCC4C3CCC5(C4CC6C5C(C7(O6)CCC(CO7)C)C)C)C)O)O)O[C@H]8[C@@H]([C@H]([C@@H]([C@H](O8)CO)O[C@H]9[C@@H]([C@H]([C@@H]([C@H](O9)CO)O)O)O)O)O
C1[C@@H]2[C@@H](CO[C@@H]2C3=CC4=C(C=C3)OCO4)[C@@H](O1)C5=CC6=C(C=C5)OCO6
C[C@@H]([C@@](C(C)C)(C(=O)OC)O)OC(=O)C1=CC=CC=C1
CC(C)C(C(=O)OC)OC(=O)C1=CC=CC=C1
CC(C)[C@H](C(=O)OC)OC(=O)/C=C/C1=CC=CC=C1
COC1=CC(=C(C=C1C=O)OC)OC
COC1=C[C@]2([C@H](C3C(=CC2(C(=O)C3(OC)OC)OC)CC=C)C(C1=O)(OC)OC)CC=C
CC(C)[C@@]12CC[C@@](C=C1)(OO2)C
COC1=CC(=CC(=C1OC)OC)[C@@H]2[C@H]3CO[C@@H]([C@H]3CO2)C4=CC5=C(C=C4)OCO5
C[C@@H]1C[C@@H]([C@]2([C@@H](O1)O[C@@H]3C[C@@H]4CC[C@@H]5[C@@H]([C@]4(C[C@H]3O2)C=O)CC[C@]6([C@@]5(CC[C@@H]6C7=CC(=O)OC7)O)C)O)OC(=O)C
COC1=CC(=C(C(=C1)OC2C(C(C(C(O2)CO)O)O)O)C(=O)CCC3=CC=C(C=C3)O)O
CCC(=O)OC1[C@H]2CC[C@@H]3[C@]1(C[C@H]([C@]4([C@H]([C@]3(C)O)C[C@@H](C4(C)C)O)O)O)C[C@@]2(C)O
CCC(=O)OC1[C@H]2CC[C@@H]3[C@]1(C[C@H]([C@]4([C@H](C3=C)C[C@@H](C4(C)C)O)O)O)C[C@@]2(C)O
CC(C(=O)OC1[C@@H]2CC[C@@H]3C1(C[C@H]([C@]4([C@H]([C@]3(C)O)C5[C@@H](C4(C)C)O5)O)O)C[C@@]2(C)O)O
CC1CCC2(CCC3(C(=CCC4C3(CCC5C4(CC(C(C5(C)CO)O)O)C)C)C2C1C)C)COC6C(C(C(C(O6)COC7C(C(C(C(O7)CO)C)O)O)O)O)O.CC1C(C(C(C(O1)O)O)O)O
C[C@@H]1C=C(O[C@@H]2[C@H]1[C@]3([C@@H](C[C@@]45C[C@@]46CC[C@@H](C([C@@H]6CC=C5[C@@]3(C2)C)(C)C)O[C@H]7[C@@H]([C@H]([C@@H](CO7)O)O)O)OC(=O)C)C)C(=O)C(C)C
CCCCCCCCCCC(C1CCC(O1)C2CCC(O2)C(CCCCCCCC[C@@H](CC3=C[C@H](OC3=O)C)O)O)O
COC1=C(C=C2CCN[C@@H]3C2=C1C4=CC=CC=C4C3)O
CCCCCCCCCCCC[C@@H]([C@@H]1CC[C@H](O1)[C@@H](CCCCC(CCCCC[C@H](CC2=C[C@@H](OC2=O)C)O)O)O)O
C[C@H]1CC[C@@]2([C@H]([C@H]3[C@@H](O2)C[C@@H]4[C@@]3(CC[C@H]5[C@H]4CC[C@H]6[C@@]5(CC[C@@H](C6)O[C@H]7[C@@H]([C@H]([C@@H]([C@H](O7)CO)O[C@H]8[C@@H]([C@H]([C@@H](CO8)O)O)O)O)O)C)C)C)OC1
C[C@H]1CC[C@@]2([C@H]([C@H]3[C@@H](O2)C[C@@H]4[C@@]3(CC[C@H]5[C@H]4CC[C@H]6[C@@]5(CC[C@@H](C6)O[C@H]7C[C@H]([C@H]([C@H](O7)CO[C@H]8[C@@H]([C@H]([C@H](CO8)O)O)O)O[C@H]9[C@@H]([C@H]([C@@H](CO9)O)O)O)O)C)C)C)OC1
CC1C2C(CC3C2(CCC4C3CC[C@H]5C4(CCC(C5)O[C@H]6[C@@H]([C@H]([C@@H]([C@H](O6)CO[C@H]7[C@@H]([C@H]([C@H](CO7)O)O)O)O[C@H]8[C@@H]([C@H]([C@@H](CO8)O)O)O)O)O)C)C)OC1(CCC(C)CO[C@H]9[C@@H]([C@H]([C@@H]([C@H](O9)CO)O)O)O)O
C[C@@H]1CC[C@@]2([C@H]([C@]3([C@@H](O2)C[C@@H]4[C@@]3([C@@H](C[C@H]5[C@H]4CCC6=CC(=O)CC[C@]56C)O)C)O)C)OC1
C[C@@H]1CC[C@@]2([C@H]([C@]3([C@@H](O2)C[C@@H]4[C@@]3(C(=O)C[C@H]5[C@H]4CC[C@H]6[C@@]5(CCC(C6)(OC)OC)C)C)O)C)OC1
C([C@@H](C(=O)[O-])[NH3+])C(=O)N
C[C@@H]1CC[C@@]2([C@H]([C@H]3[C@@H](O2)C[C@@H]4[C@@]3(CC[C@H]5[C@H]4CC[C@@H]6[C@@]5(CC[C@@H](C6)O[C@H]7[C@@H]([C@H]([C@H]([C@H](O7)CO)O)O)O)C)C)C)OC1
C[C@H]1CC[C@@]2([C@H]([C@H]3[C@@H](O2)C[C@@H]4[C@@]3(CC[C@H]5[C@H]4CC[C@H]6[C@@]5(CC[C@@H](C6)O[C@H]7[C@@H]([C@H]([C@@H]([C@H](O7)CO)O)O)O[C@H]8[C@@H]([C@H]([C@H]([C@@H](O8)CO)O)O)O)C)C)C)OC1
C[C@H]1[C@@H]([C@@H]2[C@H]([C@@H](O1)O[C@@H]3[C@H]([C@@H]([C@H](O[C@H]3OC4CCC5(C(C4)CCC6C5CCC7(C6CC8C7C(C9(O8)CCC(CO9)C)C)C)C)CO)O)O)OO2)O[C@H]1[C@@H]([C@H]([C@@H]([C@H](O1)CO)O)O)O
C[C@H]1[C@H]([C@H]([C@H]([C@@H](O1)OC2CCC3(C(C2)CCC4C3CCC5(C4CC6C5C(C7(O6)CCC(CO7)C)C)C)C)O[C@H]8[C@@H]([C@H]([C@H](CO8)O[C@H]9[C@@H]([C@H]([C@@H]([C@H](O9)CO)O)O)O)O)O)O)O
CC1CCC2(C(C3C(O2)CC4C3(CCC5C4CCC6C5(CCC(C6)O[C@H]7[C@@H]([C@H]([C@H](CO7)O[C@H]8[C@@H]([C@H]([C@@H]([C@H](O8)CO)O)O)O)O)O)C)C)C)OC1
CC1CCC2(C(C3C(O2)CC4C3(CCC5C4CCC6C5(CCC(C6)O[C@H]7[C@@H]([C@H]([C@@H]([C@H](O7)CO)O)O)O[C@H]8[C@@H]([C@H]([C@@H](CO8)O)O)O)C)C)C)OC1
C[C@H]1[C@@H]([C@H]([C@H]([C@@H](O1)O[C@H]2CO[C@H]([C@@H]([C@H]2O)O)OC[C@@H]3[C@H]([C@@H]([C@H]([C@@H](O3)OC4CCC5(C(C4)CCC6C5CCC7(C6CC8C7C(C9(O8)CCC(CO9)C)C)C)C)O)O)O)O[C@H]1[C@@H]([C@H]([C@@H]([C@H](O1)CO)O)O)O)O)O
C[C@H]1[C@H]([C@H]([C@H]([C@@H](O1)O[C@@H]2[C@H]([C@@H]([C@H](O[C@H]2OC3CCC4(C(C3)CCC5C4CCC6(C5CC7C6C(C8(O7)CCC(CO8)C)C)C)C)CO)O)O)O)O)O
C[C@H]1[C@H]([C@H]([C@H]([C@@H](O1)O[C@H]2[C@@H](C[C@@H](O[C@@H]2CO)OC3CCC4(C(C3)CCC5C4CCC6(C5CC7C6C(C8(O7)CCC(CO8)C)C)C)C)O)O[C@H]9[C@@H]([C@H]([C@@H]([C@H](O9)CO)O)O)O)O)O
C[C@H]1[C@H]([C@H]([C@H]([C@@H](O1)O[C@@H]2[C@H]([C@@H]([C@H](O[C@H]2O[C@@H]3[C@H](O[C@H]([C@@H]([C@H]3O)O)OC4CCC5(C(C4)CCC6C5CCC7(C6CC8C7C(C(O8)(CCC(C)O[C@H]9[C@@H]([C@H]([C@@H]([C@H](O9)CO)O)O)O)OC)C)C)C)CO)CO)O)O)O)O)O
CC1CCC2(C(C3C(O2)CC4C3(CCC5C4CCC6C5(CCC(C6)O[C@H]7[C@@H]([C@H]([C@H](CO7)O[C@H]8[C@@H](C[C@@H]([C@@H](O8)O[C@H]9[C@@H]([C@H]([C@@H]([C@H](O9)CO)O)O)O)O)O)O)O)C)C)C)OC1
CC1CCC2(C(C3C(O2)CC4C3(CCC5C4CCC6C5(CCC(C6)O[C@H]7[C@@H]([C@H]([C@@H]([C@H](O7)CO)O)O)O[C@H]8[C@@H]([C@H]([C@H](CO8)O[C@H]9[C@@H]([C@@H]([C@@H]([C@@H](O9)O[C@H]2[C@@H]([C@H]([C@@H]([C@H](O2)CO)O)O)O)O)O)O)O)O)C)C)C)OC1
C[C@H]1[C@H]([C@H]([C@H]([C@@H](O1)O[C@@H]2[C@H](O[C@H]([C@@H]([C@H]2O)O)OC3CCC4(C(C3)CCC5C4CCC6(C5CC7C6C(C(O7)(CCC(C)O[C@H]8[C@@H]([C@H]([C@@H]([C@H](O8)CO)O)O)O)OC)C)C)C)CO)O[C@H]9[C@@H]([C@H]([C@@H]([C@H](O9)CO)O)O)O)O)O
C[C@H]1[C@H]([C@H]([C@H]([C@@H](O1)O[C@@H]2[C@H](O[C@H]([C@@H]([C@H]2O)O)OC3CCC4(C(C3)CCC5C4CCC6(C5CC7C6C(C(O7)(CCC(C)O[C@H]8[C@@H]([C@H]([C@@H]([C@H](O8)CO)O)O)O)O)C)C)C)CO)O[C@H]9[C@@H]([C@H]([C@@H]([C@H](O9)CO)O)O)O)O)O
CC1C2C(CC3C2(CCC4C3CCC5C4(CCC(C5)O[C@H]6[C@@H]([C@H]([C@@H]([C@H](O6)CO)O[C@H]7[C@@H]([C@H]([C@@H](CO7)O)O)O[C@H]8[C@@H]([C@H]([C@@H]([C@H](O8)CO)O)O)O)O)O)C)C)OC1(CCC(C)O[C@H]9[C@@H]([C@H]([C@@H]([C@H](O9)CO)O)O)O)OC
C[C@H]1[C@@H]([C@H]([C@H]([C@@H](O1)OC[C@@H]2[C@H]([C@@H]([C@H]([C@@H](O2)OC3CCC4(C(C3)CCC5C4CCC6(C5CC7C6C(C(O7)(CCC(C)O[C@H]8[C@@H]([C@H]([C@@H]([C@H](O8)CO)O)O)O)OC)C)C)C)O)O)O)O)O)O[C@H]9[C@@H]([C@H]([C@@H](CO9)O)O)O[C@H]1[C@@H]([C@H]([C@@H](CO1)O)O)O
C[C@H]1[C@@H]([C@H]([C@H]([C@@H](O1)OC[C@@H]2[C@H]([C@@H]([C@H]([C@@H](O2)OC3CCC4(C(C3)CCC5C4CCC6(C5CC7C6C(C(O7)(CCC(C)O[C@H]8[C@@H]([C@H]([C@@H]([C@H](O8)CO)O)O)O)O)C)C)C)O)O)O)O)O)O[C@H]9[C@@H]([C@H]([C@H](CO9)O)O)O[C@H]1[C@@H]([C@H]([C@@H]([C@H](O1)CO)O)O)O
C1=CC(=CC=C1C#C/C=C/COC2=CC=C(C=C2)O)O
C[C@@H]1[C@H]([C@H]([C@H]([C@@H](O1)O[C@H]2CC[C@]3([C@H](C2)C[C@H]4[C@@]5([C@@H]3C[C@H]([C@]6([C@@]5(CC[C@@H]6C7=CC(=O)OC7)O)C)O)O4)C)O)O)O
C[C@@]12C[C@@H]3[C@H](C[C@H]1C(=C)CC[C@H]2O)C(=C)C(=O)O3
C[C@H]1[C@H]([C@H]([C@H]([C@@H](O1)O[C@@H]2[C@H]([C@@H](O[C@@H]([C@@H]2O[C@H]3C([C@H]([C@@H]([C@H](O3)CO)O[C@H]4[C@@H]([C@H]([C@@H](CO4)O)O)O)O)O)CO)O[C@@H]5[C@H]([C@@H](O[C@H]([C@@H]5O)O[C@@H]6[C@H]([C@H](CO[C@H]6OC7CCC8(C(C7(C)CO)CCC9(C8CC=C1C9(CCC2(C1CC(CC2)(C)C)C(=O)O)C)C)C)O)O)C)O)O)O)O)O
CC(=O)OCC1=C[C@]2(C3[C@@H]1[C@@H](OC=C3C(=O)O2)O[C@H]4[C@@H]([C@H]([C@@H]([C@H](O4)CO)O)O)O)C
CC(=O)OC[C@@H]1[C@H]([C@@H]([C@H]([C@@H](O1)O[C@H]2[C@H]3[C@@H]4[C@H](C=C3COC(=O)C)OC(=O)C4=CO2)OC(=O)C)OC(=O)C)OC(=O)C
CCCC(=O)C1=C(C(=C(C(C1=O)(C)C)O)CC2=C(C(=C(C(=C2O)C)OC)C(=O)CCC)O)O
CCCC1=CC(=O)C(C(=O)O1)CC2=C(C(C(=O)C(=C2O)C(=O)CCC)(C)C)O
CCCC(=O)C1=C(C(=C(C=C1O)OC)C)O
CC1CCC2(C(C3C(O2)CC4C3(CCC5C4CCC6(C5(C(C(C(C6O)O)OS(=O)(=O)O)O)C)O)C)C)OC1
CC[C@]12CCCN3[C@@H]1[C@]4(CC3)[C@@H](CC2)N(C5=C4C=CC(=C5O)OC)C(=O)C
C/C=C/1\CN[C@H]2C[C@@H]1C([C@@]34[C@@]2(NC5=CC=CC=C53)OCC4)(CO)C(=O)OC
CC1C2C(CC3C2(CCC4C3CCC5(C4(C(C(C(C5O)O)O)O)C)O[C@H]6[C@@H]([C@H]([C@@H]([C@H](O6)CO)O)O)O)C)O[C@]17CCC(=C)CO7
C/C=C\1/C2CCN3C1C4(CC3)C(C2)N(C5=C4C=CC=C5OC)C(=O)C
CCC12CCCN3C1C4(CC3)C(CC2)N(C5=C4C=CC=C5OC)C(=O)C
CC(=O)O[C@H]1CC[C@]2([C@H](C(=C)[C@@H]([C@H]([C@@H]2C1(C)C)O)O)COC3=CC4=C(C=C3)C=CC(=O)O4)C
CC1=C(C(C[C@H](C1=O)O)(C)C)/C=C/C(=C/C=C/C(=C/C=C/C=C(/C=C/C=C(/C=C/C2=C(C(=O)[C@H](CC2(C)C)O)C)\C)\C)/C)/C
C[C@H]1[C@@H]([C@H]([C@H]([C@H](O1)O[C@@H]2[C@H](OC3=CC(=CC(=C3C2=O)O)O)C4=CC(=C(C=C4)O)O)O)O)O
CCC(C(=O)[C@@](C=O)([C@@H](C(=O)C(C=N)C1=CC=CC=C1)O)N(C(=O)[C@@H]2C([C@@H](CN2)Cl)Cl)C(=O)C(CC)N)N
C1=CC(=CC=C1C2=C(C(=O)C3=C(C=C(C=C3O2)O)O)O[C@H]4C(C([C@@H]([C@H](O4)CO)O)O)O)O
CC(=O)O[C@H]1[C@@H](CO[C@H]([C@@H]1OC(=O)C)OC2CCC34CC35CCC6(C(C(CC6(C5CC(C4C2(C)C)O[C@H]7[C@@H]([C@H]([C@@H]([C@H](O7)CO)O)O)O)C)O)C8(CCC(O8)C(C)(C)O)C)C)O
CC(=O)O[C@@H]1[C@H]([C@@H](CO[C@H]1OC2CCC34CC35CCC6(C(C(C[C@]6(C5CC(C4C2(C)C)O[C@H]7[C@@H]([C@H]([C@@H]([C@H](O7)CO)O)O)O)C)O)[C@]8(CCC(O8)C(C)(C)O)C)C)O)O
C[C@]12CC[C@@]34C[C@@]35CC[C@@H](C([C@@H]5[C@H](C[C@H]4[C@@]1(C[C@@H]([C@@H]2[C@]6(CC[C@H](O6)C(C)(C)O)C)O)C)O)(C)C)O[C@H]7[C@@H]([C@@H]([C@@H](CO7)O)O)O[C@H]8[C@@H]([C@H]([C@H]([C@H](O8)CO)O)O)O
CC1(C(CCC23C1C(CC4(C2(C3)CCC5(C4(CC(C5C6(CCC(O6)C(C)(C)O)C)O)C)C)C)OCC7C(C(C(C(O7)CO)O)O)O)OCC8C(C(C(CO8)O)O)O)C
C[C@]12CCC34CC35CCC(C(C5[C@H](CC4[C@@]1(C[C@@H](C2C6(CCC(O6)C(C)(C)O[C@H]7[C@@H]([C@H]([C@@H]([C@H](O7)CO)O)O)O)C)O)C)O)(C)C)O[C@H]8[C@@H]([C@H]([C@@H](CO8)O)O)O[C@H]9[C@@H]([C@H]([C@@H]([C@H](O9)CO)O)O)O
C[C@]12CCC34CC35CCC(C(C5[C@H](CC4[C@@]1(C[C@@H](C2C6(CCC(O6)C(C)(C)O)C)O)C)O[C@H]7[C@@H]([C@H]([C@@H]([C@H](O7)CO)O)O)O)(C)C)O[C@H]8[C@@H]([C@H]([C@@H](CO8)O)O)O[C@H]9[C@@H]([C@H]([C@@H]([C@H](O9)CO)O)O)O
C[C@]12CCC34CC35CCC(C(C5[C@H](CC4[C@@]1(CC(C2C6(CCC(O6)C(C)(C)O[C@H]7[C@@H]([C@H]([C@@H]([C@H](O7)CO)O)O)O)C)O)C)O[C@H]8[C@@H]([C@H]([C@@H]([C@H](O8)CO)O)O)O)(C)C)O[C@H]9[C@@H]([C@H]([C@@H](CO9)O)O)O
C[C@]12CC[C@@]34C[C@@]35CC[C@@H](C([C@@H]5[C@H](C[C@H]4[C@@]1(C[C@@H]([C@@H]2[C@]6(CC[C@H](O6)C(C)(C)O)C)O)C)O[C@H]7C([C@H](C([C@H](O7)CO)O)O)O)(C)C)O[C@H]8[C@@H]([C@H]([C@@H](CO8)O)O)O
CC1C(C(C(C(O1)OC2C(C(COC2OC3CCC45CC46CCC7(C(C(CC7(C6CC(C5C3(C)C)OC8C(C(C(CO8)O)O)O)C)O)C9(CCC(O9)C(C)(C)O)C)C)O)O)O)O)O
CC1[C@@H](C([C@@H]([C@@H](O1)OCC2[C@@H]([C@@H](C([C@@H](O2)OC3=C(OC4=CC(=CC(=C4C3=O)O)O[C@H]5[C@H](C([C@H](C(O5)C)O)O)O)C6=CC=C(C=C6)O)O[C@H]7[C@H](C([C@H](C(O7)C)O)O)O)O)O)O)O)O
C1=CC(=C(C=C1/C=C/C2=CC(=CC(=C2)O[C@H]3[C@@H]([C@H]([C@@H]([C@H](O3)CO)O)O)O)O)O)O
CN1C2=CC(=C(C(=C2C(=O)C3=C1C(=C(C=C3)OC)OC)O)OC)O
CN1C2=C(C=CC(=C2O)OC)C(=O)C3=C1C(=C(C=C3O)OC)O
CC1(C=CC2=C3C(=C(C=C2O1)O)C(=O)C=C(O3)C4=CC=C(C=C4)O)C
CC1(C=CC2=C3C(=C(C=C2O1)O)C(=O)C4=C(N3)C(=CC=C4)O)C
CC(=CCC1=C(C2=C(C3=C1OC(C=C3)(C)C)NC4=C(C2=O)C=CC=C4O)O)C
CC(C)CC(=O)OC1C(OC2=C1C3=C(C=C2)C=CC(=O)O3)C(C)(C)OC(=O)CC(C)C
COC1=CC2=C(C=C1)C3=C4C(=CC5=C3OCO5)C=CN=C4C2=O
C[C@@]12CCCC(C1CC[C@@]34[C@@H]2C[C@H]5[C@@H](C3)COC5C4)(C)C
C[C@@]12CCC[C@@]3([C@@H]1CCC45[C@H]3C[C@H](CC4)C(=O)C5O)C6N(C2)CCO6
CC1=C2C[C@@H]3C(=C)CCC[C@]3(C=C2OC1=O)C
CC1=C2C[C@@H]3C(=C)CCC[C@]3(C[C@H]2OC1=O)C
CC1=C2C[C@@H]3C(=C)CCC[C@]3(C[C@]2(OC1=O)O)C
C/C=C/C#CC#C/C=C/C1=CC=CO1
C1=COC(=C1)/C=C/C#CC#CCCCO
CC1=COC2=C1C[C@H]3C(=C)CCC[C@@]3(C2)C
CC(C)CC(=O)O[C@@H]1[C@H]([C@@H]([C@H](O[C@H]1O[C@@H]2C[C@H]([C@H]3CC[C@@]45C[C@@H](CCC4[C@@]3(C2)C)C(=C)[C@H]5O)C(=O)O)CO)OS(=O)(=O)[O-])OS(=O)(=O)[O-].[K+].[K+]
C/C/1=C\2/[C@](CC(=O)O2)([C@H](/C(=C\C[C@@H]3C(=C(C(=O)O[C@]3(CC1)C)OC)C(C)C)/C)OC(=O)C)O
CC1=CC(=C(C(=C1C(=O)OC2=C(C(=C(C(=C2)C)O)C(=O)OC)C)O)C=O)O
C[C@@H]1[C@H]([C@H](C[C@@H](O1)O[C@H]2[C@@H](O[C@H](C[C@@H]2OC)O[C@@H]3[C@H](O[C@H]([C@@H]([C@H]3OC)O)O[C@H]4CC[C@@]5([C@H]6CC=C7[C@@H]8[C@@H](CO[C@@]8(OC7=O)C)OC(=O)[C@H]6CC=C5C4)C)C)C)OC)O
C1=CC(=CC=C1C2=C(C(=O)C(=C(C2=O)O)C3=CC=C(C=C3)O)O)O
CN\1C=CC=C/C1=C\[NH+]=O.CN1[C@@H]2CC[C@H]1CC(C2)OC(=O)C(CO)C3=CC=CC=C3.[Cl-]
CC(=O)OCC(C(=C)C(=O)O[C@H]1C[C@]2([C@@H](CC[C@@H]([C@@H]2[C@H]([C@@H]1C(=C)C(=O)OC)O)CO)O)C)O
C1=COC([C@H]2[C@@H]1C(C=C2CO)O)O
C1C(C2C(C1O)C=COC2OC3[C@@H]([C@H]([C@@H]([C@H](O3)CO)O)O)O)CO
COC1=CC(=CC(=C1O)OC)C2=CC=CC=C2
C[C@H](CC1=CC(=C(C(=O)O1)C/C=C(\C)/CCC=C(C)C)O)O
CC1=C(C(=C2C(=C1)C(=O)C3=CC(=C(C(=C3C2=O)O)OC)O)OC)O
CC(=CCC/C(=C/COC1=CC2=C(C=C1)C=CC(=O)O2)/C)C
C1=CC(=C(C=C1/C=C\2/C(=O)C3=C(C=C(C=C3O2)O)O)O)[O-]
C1=CC(=C(C=C1/C=C\2/C(=O)C3=C(C=C(C=C3O2)O[C@H]4[C@@H]([C@H]([C@@H]([C@H](O4)CO)O)O)O)O)O)O
CC1=C[C@H]2[C@@H]([C@H]([C@]34[C@]2(NC5=CC=CC=C53)N(CC4)C)C6=C(C7=CC=CC=C7N6)CCN(C)C)C(C1)(C)C
CC(=CCC1=C2C(=C(C3=C1OC=C(C3=O)C4=C(C=C(C=C4)O)O)O)C=CC(O2)(C)C)C
CC(=CCC1=CC(=CC(=C1O[C@H]2[C@@H]([C@H]([C@@H]([C@H](O2)CO)O)O)O)CC=C(C)C)C(=O)OC[C@@H]3CCN4[C@@H]3CCC4)C
COC1=C(C=C(C=C1O[C@H]2C(C([C@@H](C(O2)CO)O)O)O)C3CCC4=C(O3)C=C(C=C4)O)O
CC1=C2[C@H]([C@@H]([C@@]3([C@H](C[C@@H](C(=C)[C@H]3CC(C2(C)C)C[C@@H]1OC(=O)C)OC(=O)[C@@H](C(C4=CC=CC=C4)N(C)C)OC(=O)C)OC(=O)C)C)OC(=O)C)OC(=O)C
CC1=C2C(=O)[C@@H]([C@]3([C@H](C[C@@H](C2(C)C)[C@H]([C@@H]1OC(=O)C)OC(=O)C)C(=C)[C@H](C[C@@H]3OC(=O)C)OC(=O)[C@@H]([C@@H](C4=CC=CC=C4)N(C)C)OC(=O)C)C)OC(=O)C
C[C@@H]1C[C@@H]2[C@H]([C@@H]([C@]3([C@H]1[C@@H]4[C@H]([C@@H]3O)O4)C)O)C(=C)C(=O)O2
CC1(C2CCC3(C(C2(CCC1OC4C(C(C(CO4)OC5C(C(C(C(O5)CO)O)O)O)O)OC6C(C(C(C(O6)CO)O)O)O)C)CC7C8(C3(CC(C9(C8CC(C(C9)OC(=O)C1=CC=CC=C1)(C)C=O)C)O)C)O7)C)C
C[C@H]1[C@H]2[C@H](C[C@@H]3[C@@]2(CC[C@H]4[C@H]3CC=C5[C@@]4(CCC(C5)O[C@H]6[C@@H]([C@H]([C@@H]([C@H](O6)CO)O[C@H]7[C@@H]([C@@H]([C@@H]([C@@H](O7)C)O)O)O)O)O[C@H]8[C@@H]([C@H]([C@@H]([C@H](O8)CO)O)O)O)C)C)O[C@]19CC[C@@](O9)(C)CO[C@H]1[C@@H]([C@H]([C@@H]([C@H](O1)CO)O)O)O
C[C@H]1[C@H]2[C@H](C[C@@H]3[C@@]2(CC[C@H]4[C@H]3CC=C5[C@@]4(CCC(C5)O[C@H]6[C@@H]([C@H]([C@@H]([C@H](O6)CO[C@H]7[C@@H]([C@@H]([C@@H]([C@@H](O7)C)O)O)O)O)O)O[C@H]8[C@@H]([C@H]([C@@H]([C@H](O8)CO)O)O[C@H]9[C@@H]([C@H]([C@@H]([C@H](O9)CO)O)O)O)O)C)C)O[C@]11CC[C@@](O1)(C)CO[C@@H]1[C@@H]([C@H]([C@H]([C@H](O1)CO)O)O)O
C1=CC(=O)C=CC1=C/C=C\2/NC3=C(C=C(C=C3)O)C(=O)O2
C[C@]1(C[C@@H]([C@@H]2[C@H]1[C@H](C2(C)C)C3=C(C=CC(=C3)CCN(C)C)OC)C4=C(C=CC(=C4)CCN(C)C)OC)O
CC(=C)/C=C/C1=C(C2=C(C3=C1OC(=O)C=C3)OC(C=C2)(C)C)OC
C[C@@H]1[C@@H]([C@@H]([C@H]([C@@H](O1)OC[C@@H]2[C@H]([C@@H]([C@H]([C@@H](O2)O[C@H]3CC[C@]4([C@H](C3(C)C)CC[C@@]5([C@@H]4CC=C6[C@]5(C[C@H]([C@@]7([C@H]6CC([C@H](C7)OC(=O)/C(=C/CC[C@](C)(C=C)O[C@H]8[C@@H]([C@H]([C@@H]([C@H](O8)C)OC(=O)/C(=C/CC[C@](C)(C=C)O)/CO)O)O)/CO)(C)C)C(=O)O[C@H]9[C@@H]([C@H]([C@@H]([C@H](O9)CO)O)O)O[C@H]1[C@@H]([C@@H]([C@H]([C@@H](O1)C)O[C@H]1[C@@H]([C@H]([C@@H](O1)CO)O)O)O[C…
CC[C@H](C)[C@@H](C(=O)N[C@@H](CC(C)C)C(=O)N1CCC[C@H]1C(=O)N[C@@H](CCC(=O)N)C(=O)O)NC(=O)[C@@H]2CCCN2C(=O)[C@H]([C@@H](C)O)NC(=O)[C@H](CC(=O)O)NC(=O)[C@H](CO)NC(=O)[C@@H]3CCCN3C(=O)CNC(=O)[C@@H]4CCCN4C(=O)[C@H](CC(C)C)NC(=O)[C@H](CCCNC(=N)N)NC(=O)[C@H](CO)NC(=O)[C@@H]5CCCN5C(=O)[C@H](CO)NC(=O)[C@@H]6CCCN6C(=O)[C@H](CC(C)C)NC(=O)[C@H](CO)NC(=O)[C@@H]7CCCN7C(=O)[C@@H]8CCCN8C(=O)[C@@H]9CCCN9C(=O)[C@H…
C[C@@H]1[C@@H]([C@@H]([C@H]([C@@H](O1)OC[C@@H]2[C@H]([C@@H]([C@H]([C@@H](O2)O[C@H]3CC[C@]4([C@H](C3(C)C)CC[C@@]5([C@@H]4CC=C6[C@]5(C[C@H]([C@@]7([C@H]6CC([C@H](C7)OC(=O)/C(=C/CC[C@](C)(C=C)O[C@H]8[C@@H]([C@H]([C@@H]([C@H](O8)C)OC(=O)/C(=C/CC[C@](C)(C=C)O)/C)O)O)/CO)(C)C)C(=O)O[C@H]9[C@@H]([C@H]([C@@H]([C@H](O9)CO)O)O)O[C@H]1[C@@H]([C@@H]([C@H]([C@@H](O1)C)O[C@H]1[C@@H]([C@H]([C@@H](O1)CO)O)O)O[C@…
COC1=CC(=C2C(=C1)OC(=C(C2=O)O[C@H]3[C@@H]([C@H]([C@@H](O3)CO)O)O)C4=CC(=C(C=C4)O)O)O
COC1=C(C=C2C(=C1O)C(=O)C(=C(O2)C3=CC(=C(C=C3)O)O)OC)O
COC1=C(C=C(C=C1)C2=C(C(=O)C3=C(C=C(C=C3O2)OC)O)OC)O
C1OC2=C(O1)C=C3C(=C2)C=CC(=O)O3
C/C=C(\C)/C(=O)O[C@H]1C[C@H]([C@]2(CO[C@@H]3C2[C@]14COC([C@H]4[C@]([C@@H]3O)(C)[C@@]56[C@H]7CC(C5(O6)C)C8(C=CO[C@H]8O7)O)(C(=O)OC)O)OC(=O)C)OC(=O)C
COC1=C2C(=CC(=C1)O)OC(=C(C2=O)O)C3=CC(=C(C=C3)O)O
C[C@H]1[C@@H]([C@H]([C@H]([C@@H](O1)OC2=C(OC3=CC(=CC(=C3C2=O)OC)O)C4=CC(=C(C=C4)O)O)O)O)O
C[C@H]1[C@@H]([C@H]([C@H]([C@@H](O1)OC[C@@H]2[C@H]([C@@H]([C@H]([C@H](O2)O[C@@H]3C(=O)O[C@H]([C@]4([C@@]35C(=C)C(C[C@@H]4OC(=O)C)[C@]6([C@@H](O5)C[C@@H](C([C@@H]6CC(=O)OC)(C)C)OC(=O)C)C)C)C7=COC=C7)O)O)O)O)O)O
CC(C)C(=O)OC1[C@]2(C3CC([C@@]4(C([C@]3(CO1)C(CC2OC(=O)C)O)C(=O)CC5([C@]46[C@H](O6)CC5C7=COC=C7)C)C)O)C
C1CNC1C(=O)O
CC(C)[C@H]1CC[C@@H]2[C@@]1(C[C@@H]([C@@]3([C@]24C[C@H]4[C@](CC3)(C)O)C)OC(=O)C)C
CCC1CC(OC(=O)C1)CCCCCCCCCCCCCCCCC(C(C)CC)O[C@@H]2[C@@H]([C@H]([C@@H]([C@H](O2)CO[C@H]3[C@@H]([C@@H]([C@H]([C@@H](O3)C)O)O)O)O)O)O
C[C@]12CC[C@@](C[C@H]1C3=CC[C@@H]4[C@]5(CC[C@@H]([C@]([C@@H]5CC[C@]4([C@@]3(CC2)C)C)(C)CO)O[C@H]6[C@@H]([C@H]([C@@H]([C@H](O6)C(=O)O)O)O)O[C@H]7[C@@H]([C@H]([C@@H]([C@H](O7)CO)O)O)O)C)(C)C(=O)O
[CH]1[CH][C]2[CH][C]=[C][C]=[C][C]2[CH]1
CC1=C2[C@H]([C@@H]([C@@]3([C@H](C[C@@H](C4([C@H]3[C@@H]([C@@H](C2(C)C)C[C@@H]1OC(=O)C)OC(=O)C)CO4)OC(=O)C)OC(=O)C)C)OC(=O)C)OC(=O)C
CC1=C2[C@H](C(=O)[C@@]3([C@@H](C[C@@H]4[C@](C3[C@@H]([C@@](C2(C)C)(C[C@@H]1O)O)OC(=O)C5=CC=CC=C5)(CO4)OC(=O)C)O)C)OC(=O)C
CC1=C2[C@H]([C@H]([C@@]3([C@H](C[C@@H]4[C@]([C@H]3[C@@H]([C@@](C2(C)C)(C[C@@H]1OC(=O)C)O)OC(=O)C)(CO4)OC(=O)C)OC(=O)C)C)OC(=O)C)OC(=O)C
CC1=C2[C@H](C(=O)[C@@]3(C(C[C@@H]4[C@](C3C([C@@](C2(C)C)(CC1O)O)OC(=O)C5=CC=CC=C5)(CO4)OC(=O)C)O)C)OC(=O)C
CC1=C2[C@H]([C@H]([C@@]3([C@H](C[C@@H]4[C@]([C@H]3[C@@H]([C@@](C2(C)C)(C[C@@H]1OC(=O)C)O)OC(=O)C5=CC=CC=C5)(CO4)OC(=O)C)OC(=O)C)C)OC(=O)C)OC(=O)C
CCCCCC(=O)O[C@H]1[C@H]2[C@@]([C@H](C[C@@H]3[C@]2(CO3)OC(=O)C)OC(=O)C)([C@@H]([C@@H](C4=C([C@H](C[C@@]1(C4(C)C)O)OC(=O)C)C)OC(=O)C)OC(=O)C)C
CC(=CCC[C@@](C)(C=C)/C=C/C1=CC=C(C=C1)O)C
CC(=C[C@@H]1CO[C@]23C[C@]4(CO2)[C@H]([C@H]3[C@@]1(C)O)CC[C@H]5[C@]4(CC[C@@H]6[C@@]5(CC[C@@H](C6(C)C)O[C@@H]7[C@@H]([C@H]([C@H](CO7)O)O[C@@H]8[C@@H]([C@H]([C@H]([C@H](O8)COS(=O)(=O)O)O)O)O)O[C@H]9[C@H]([C@@H]([C@@H](O9)CO)O)O)C)C)C
CC(=C[C@@H]1CO[C@]23C[C@]4(CO2)[C@H]([C@H]3[C@@]1(C)O)CC[C@H]5[C@]4(CC[C@@H]6[C@@]5(CC[C@@H](C6(C)C)O[C@H]7[C@@H]([C@@H]([C@H](CO7)O)O[C@H]8[C@@H]([C@@H]([C@@H]([C@H](O8)COS(=O)(=O)[O-])O)O)O)O)C)C)C
CC(=C[C@H]1C[C@](C2C3CCC4C(C35CC2(O1)OC5)CCC6[C@@]4(CCC(C6(C)C)[C@]7([C@@H]([C@H]([C@@H]([C@H](O7)CO)O)O)O[C@H]8[C@@H]([C@H]([C@@H](O8)CO)O)O)O[C@H]9[C@@H]([C@H]([C@@H]([C@H](O9)CO)O)O)O)C)(C)O)C
CC1=C(C=C(C(=C1O)C(=O)C(C)C)OC)OC
C1C(OC2=CC(=C(C(=C2C1=O)O)O)O)C3=CC=CC=C3
C1=CC=C(C=C1)C2=CC(=O)C3=C(C(=C(C=C3O2)O)O[C@H]4[C@@H]([C@H]([C@@H]([C@H](O4)C(=O)O)O)O)O)O
C1=CC=C(C=C1)C2=CC(=O)C3=C(C(=C(C=C3O2)O[C@H]4C([C@H]([C@@H](C(O4)C(=O)O)O)O)O)O)O
C1C=CCN[C@@H]1C(=O)O
C/C/1=C/C(CC2(C(O2)CC3C(C1)OC(=O)C3=C)C)O
CC1CCC=C(C12CCC(C2)C(C)(C)O)C=O
C[C@@]12CCC[C@H]([C@@]13C[C@@H](CC2)C(O3)(C)C)CO
CC1=C(C=CC(=C1C(=O)C2=C(C=CC(=C2O)C(=O)C)O)O)O
C[C@H]1CCCC2[C@@]1(C[C@]3(C2)C(=C)COC3=O)C
CC(C)(C1CC2=C(O1)C=CC(=C2O)C(=O)/C=C/C3=CC=C(C=C3)O)O
CCCCCCCCCCCC(=O)O[C@@]12C[C@H]([C@@]3([C@@H]4C=C(C(=O)[C@]4([C@@H]([C@@]5([C@H]([C@H]3[C@@H]1C2(C)C)O5)CO)O)O)C)O)C
C[C@H]1[C@@H]([C@H]([C@H](C(O1)O[C@@H]2[C@H]([C@@H](O[C@@H]([C@H]2OC(=O)/C=C/C3=CC(=C(C=C3)O)O)CO[C@H]4[C@@H]([C@](CO4)(CO)O)O)OCCC5=CC(=C(C=C5)O)O)O)O[C@H]6[C@@H]([C@H]([C@H](CO6)O)O)O)O)O
COC1=CC(=CC(=C1OC)OC)C2=CC(=O)C3=C(O2)C(=C(C=C3OC)OC)OC
C[C@H]1[C@H]([C@H]([C@H]([C@@H](O1)OC2=C(OC3=C(C2=O)C(=CC(=C3CC=C(C)C)O)O)C4=CC=C(C=C4)OC)O)O)O
C[C@@H]1[C@@H]([C@@H]([C@@H]([C@H](O1)OC2=C(OC3=C(C2=O)C(=CC(=C3CC=C(C)C)O)O)C4=CC=C(C=C4)O)O)O)O
C[C@H]1[C@H]([C@H]([C@H]([C@@H](O1)O[C@H]2[C@@H](O[C@H]([C@@H]([C@@H]2O)O)OC3=C(OC4=C(C3=O)C(=CC(=C4CC=C(C)C)O)O)C5=CC=C(C=C5)O)C)O)O)O
C[C@H]1[C@H]([C@H]([C@H]([C@@H](O1)OC2=C(C3=C(C(=C2)O)C(=O)C(=C(O3)C4=CC=C(C=C4)O)O[C@H]5[C@@H]([C@@H]([C@H]([C@@H](O5)C)O)O)O)CC=C(C)C)O)O)O
C[C@H]1[C@@H]([C@H]([C@H]([C@@H](O1)O[C@H]2[C@@H](O[C@H]([C@@H]([C@@H]2O)O)OC3=C(OC4=C(C3=O)C(=CC(=C4CC=C(C)C)O[C@H]5[C@@H]([C@H]([C@@H]([C@H](O5)CO)O)O)O)O)C6=CC=C(C=C6)O)C)O)O)O
C[C@H]1[C@@H]([C@H]([C@H]([C@@H](O1)OC2=C(OC3=C(C2=O)C(=CC(=C3CC=C(C)C)O)O)C4=CC=C(C=C4)OC)O)O)O[C@H]5[C@@H]([C@H]([C@@H]([C@H](O5)CO)O)O)O
CC(=CCC1=C(C=C(C2=C1OC(=CC2=O)C3=CC(=C(C(=C3)OC)O)OC)O)O)C
C1CN2C[C@H]3C[C@@H]([C@H]2C[C@@H]1O)CN4C3=CC=CC4=O
CC(C)C1=C(C(=C2CC3=CCCC([C@@H]3CCC2=C1)(C)C)O)O
CC1(C=CC2=C(O1)C=CC3=C2OC=C(C3=O)C4=CC(=C(C=C4OC)OC)OC)C
CC1C2C(CC3C2(CCC4C3CCC5C4(CCC(C5)O)C)C)OC16CCC(CO6)CO
C[C@]12CC[C@@H](C(C1CC[C@@]3(C2CC=C4C3(C(C([C@@]5([C@H]4CC(CC5O)(C)C)CO)O)O)C)C)(C)C)O
C[C@]12CC[C@@H](C([C@@H]1CC[C@@]3([C@@H]2CC=C4[C@]3(C[C@H]([C@@]5([C@H]4CC([C@H]([C@@H]5O)O)(C)C)CO)O)C)C)(C)C)O
CC(=CCC1=C(C=CC(=C1)/C=C/C(=O)C2=CC(=C(C=C2O)O)CC(C(=C)C)O)O)C
CC(=CCC1=C(C=CC(=C1)/C=C/C(=O)C2=CC3=C(C=C2O)OC(C3)C(C)(C)O)O)C
CC1(CCC2=C(O1)C=CC(=C2)/C=C/C(=O)C3=CC4=C(C=C3O)OC(C4)C(C)(C)O)C
CCC(C)/C=C(\C)/C=C/C=C/C(=O)C1=C(C(=CN(C1=O)O)C2=CC=C(C=C2)O)O
CC(C)CC1C(=O)OC(C(=O)N(C(C(=O)OC(C(=O)N(C(C(=O)OC(C(=O)N(C(C(=O)OC(C(=O)N1C)C(C)C)CC(C)C)C)C(C)C)CC(C)C)C)C(C)C)CC(C)C)C)C(C)C
COC1=CC(=C2C(=C1)C=CC3=CC(=C(C=C32)O)OC)OC
COC1=CC(=CC(=C1)O)CCC2=CC(=CC=C2)O
COC1=CC(=CC(=C1)O)CCC2=CC=CC=C2O
C[C@@H]1[C@@H]2[C@](CCC1C)(CC[C@]3(C2(CCC4C3=CCC5[C@@]4(CC[C@@H](C5(C)C)O)C)C)C)C
CC1CCC2(CCC3(C4=CCC5C(C(CCC5(C4CCC3(C2C1C)C)C)OC(=O)C)(C)C)C)C
CC(=CCC1=C(C=C(C(=C1)C(=O)/C=C/C2=CC=C(C=C2)O)O)O)C
CC(=CCC1=C(C=C2C(=C1)C(=O)C[C@H](O2)C3=CC=C(C=C3)O)O)C
CC(=CCC1=C(C=C2C(=C1)C(=O)C=C(O2)C3=CC=C(C=C3)O)OC)C
CC1(C(CC2=C(C=C(C(=C2O1)C(=O)/C=C/C3=CC=C(C=C3)O)O)O)O)C
CC1(C=CC2=CC(=C(C=C2O1)O)C(=O)/C=C/C3=CC=C(C=C3)O)C
CC1(C(CC2=C(O1)C=C3C(=C2)C4=C(O3)C5=C(C=C(C=C5)O)OC4=O)O)C
CC(C)(C1CC2=C(O1)C=C3C(=C2)C4=C(O3)C5=C(C=C(C=C5)O)OC4=O)O
C[C@@]12CC[C@@H]3[C@@]([C@H]1CC=C4[C@]2(CC[C@@]5([C@H]4CC(CC5)(C)C)C(=O)O)C)(C[C@@H]([C@@H]([C@@]3(C)CO)O[C@H]6[C@H](C([C@@H](C(O6)CO)O[C@H]7[C@H](C([C@@H](C(O7)CO)O)O)O)O)O)O)C
COC1=C2C=C(CCC3=C(C(=C(C=C3C4=CC(=C(/C=C\C5=CC(=C(C2=C5)O)Cl)C(=C4O)Cl)Cl)Cl)O)Cl)C=C1
C1CC2=C(C(=C(C=C2C3=CC(=C(/C=C\C4=CC(=C(C(=C4)C5=CC1=CC(=C5O)Cl)O)Cl)C(=C3O)Cl)Cl)Cl)O)Cl
CC1C(C(CC(O1)OC2CCC3(C(C2)CCC4C3CCC5(C4(CCC5C6=CC(=O)OC6)O)C)C)OC)O
CC(C)[C@H]1C(=O)N([C@@H](C(=O)O[C@H](C(=O)N([C@@H](C(=O)O[C@H](C(=O)N([C@@H](C(=O)O1)CC2=CC=CC=C2)C)C(C)C)CC3=CC=CC=C3)C)C(C)C)CC4=CC=CC=C4)C
C[C@H]1[C@@H]([C@@H](C[C@@H](O1)O[C@H]2CC[C@]3([C@@H](C2)CC[C@@H]4[C@@H]3CC[C@]5([C@@]4(C[C@@H]([C@@H]5C6=CC(=O)OC6)OC(=O)C)O)C)C)OC)O
C[C@]1(CC[C@@H](O1)C(C)(C)O)[C@H]2[C@H](C[C@@]3([C@@]2(CC[C@]45[C@H]3CC[C@H]6[C@]4(C5)CC[C@@H](C6(C)C)O[C@@H]7[C@@H]([C@@H]([C@@H](CO7)O)O)O)CO)C)O
CC(=O)O[C@H]1[C@H]2C([C@@]3(CC[C@](O2)(O3)C(C)(C)O)C)C4([C@@]1(C5CCC6[C@@]7([C@]5(C7)CC4)CC[C@@H](C6(C)C)O[C@H]8[C@@H]([C@H]([C@@H](CO8)O)O)O)C)C
CC(=O)O[C@H]1[C@@H](C([C@@]2([C@@]1(C3CCC4[C@@]5([C@]3(C5)CC2)CC[C@@H](C4(C)C)O[C@H]6[C@@H]([C@H]([C@@H](CO6)O)O)O)C)C)C(C)(CC[C@H](C(C)(C)O)O)O)O
C[C@H]1[C@H]([C@H]([C@H]([C@@H](O1)O[C@@H]2[C@H](O[C@H]([C@@H]([C@H]2O)O)OC[C@@H]3[C@H]([C@@H]([C@H]([C@@H](O3)OC(=O)[C@]45CCC(CC4C6=CCC7[C@]8(CC[C@@H](C(C8CC[C@]7(C6(CC5)C)C)(C)C)O[C@H]9[C@@H]([C@H]([C@@H](CO9)O)O[C@H]1[C@@H]([C@H]([C@@H]([C@H](O1)CO)O)O)O)O)C)(C)C)O)O)O)CO)O)O)O
C[C@H]1[C@@H]([C@H]([C@H]([C@@H](O1)O[C@@H]2[C@H](O[C@H]([C@@H]([C@H]2O)O)OC[C@@H]3[C@H]([C@@H]([C@H]([C@@H](O3)OC(=O)[C@@]45CC[C@@]6(C(=CCC7[C@]6(CCC8[C@@]7(CC[C@@H]([C@@]8(C)COC(=O)CC(=O)OC)O)C)C)C4CC(CC5)(C)C)C)O)O)O)CO)O)O)O
CC(=O)O[C@@]12[C@H]3[C@@H](C4[C@@]5(CN(C3[C@]4([C@H](C[C@@H]5O)OC)[C@]6(C1[C@@H]([C@@](C6)([C@H]([C@@H]2O)OC)O)OC(=O)C7=CC=CC=C7)O)C)COC)O
CC(=CCCC(=C)/C=C/C=C(/COC(=O)C)\[C@@H]1CC[C@@]2([C@H]1O)[C@@H](/C(=C(/C)\C=O)/CC[C@]2(C)O)CCCO)C
CCCC/C=C/CCCCCCCCCC1=CC(=CC(=C1O)OC)OC
CCCC/C=C\CCCCCCCCCC1=CC(=CC(=C1)OC)O
CN1C2CCC1CC(C2)OC(=O)[C@H]3CC[C@@](C4=CC=CC=C34)(C5=CC=CC=C5)C(=O)OC6CC7CCC(C6)N7C
C[C@]12CCC(=O)C(C1CC[C@@]3([C@@H]2CC=C4[C@]3(C[C@H]([C@@]5([C@@H]4CC([C@H]([C@@H]5O)O)(C)C)CO)O)C)C)(C)C
C1=CC=C(C=C1)C=O.C1=CC=C(C=C1)C=O
C1=CC=C2C3=C4C(=CC2=C1)C=CC5=C4C(=CC=C5)C=C3
CC1=CC2=C(C=C1)C(OC3=C2C(=O)N(C4=CC=CC=C43)C)(C)C
CC1=C(C=CC(=C1)C2=NC3=CC=CC=C3S2)N
C1=CC2C(C=C1)OC(=O)N2
CCN1C[C@@]2([C@@H](C[C@H]([C@]34[C@@H]1[C@@H](C(C23)OC)[C@]5([C@H]([C@@H]([C@]6(CC4C5C6OC(=O)C7=CC=CC=C7)O)OC)O)O)OC)O)COC
C[C@@H]([C@H]1CC[C@@]2([C@@]1(CC=C3[C@H]2CC[C@@H]4[C@@](C3)(CC[C@@H](C4(C)C)NC(=O)C5=CC=CC=C5)O)C)C)N(C)C
C[C@H]1CC2=CC(=C(C(=C2C3=C(C(=C(C=C3C[C@]1(C)O)OC)OC)OC)OC4=CC=CC=C4)OC)OC
CC1CC2=CC(=C(C(=C2C3=C(C(=C(C=C3[C@H]([C@]1(C)O)OC4=CC=CC=C4)OC)OC)OC)OC)OC)OC
CC(=O)[C@@H]1CC[C@]2([C@@]1([C@@H](C[C@H]3[C@]2(CC=C4[C@@]3(CC[C@@H](C4)O)C)O)OC(=O)C5=CC=CC=C5)C)O
CN1C[C@@]2([C@@H](CC(C34[C@@H]2[C@H](C(C31)[C@@]5([C@@H]6[C@@H]4C[C@]([C@@H]6OC(=O)C7=CC=CC=C7)([C@H]([C@@H]5O)OC)O)O)OC)OC)O)COC
CCN1C[C@@]2(C(CC(C34C2C(C(C31)[C@]5(C([C@@H]([C@]6(CC4C5C6OC(=O)C7=CC=CC=C7)O)OC)O)OC)OC)OC)O)COC
C1=CC=C(C=C1)C(=O)OCC(=O)/C=C\2/C=CC(=O)O2
C[C@]12C[C@@]3([C@H]4C[C@@]1(C4([C@@H](O2)O3)COC(=O)C5=CC=C(C=C5)O)O[C@H]6[C@@H]([C@H]([C@@H]([C@H](O6)COC(=O)C7=CC=CC=C7)O)O)O)O
C[C@]12C[C@@]3([C@H]4C[C@@]1([C@@]4([C@H](O2)O3)COC(=O)C5=CC=CC=C5)O[C@H]6[C@@H]([C@H]([C@@H]([C@H](O6)COC(=O)C7=CC=CC=C7)O)O)O)O
CC(=O)C1CC[C@]2(C1([C@@H](CC3C2CC=C4C3(CC[C@@H](C4)O)C)OC(=O)C5=CC=CC=C5)C)O
C1=CC=C(C=C1)C(=O)OCC2=C(C=CC(=C2)O)O[C@H]3[C@@H]([C@H]([C@@H]([C@H](O3)CO)O)OC(=O)C4=CC=CC=C4)O
C[N+](C)(C)CCOC1=CC=CC=C1.[I-]
C1=CC=C(C=C1)C[18OH]
C1=CC=C(C=C1)COC(=O)C2=CC=CC=C2
C1=CC=C(C=C1)COC(=O)/C=C\C2=CC=CC=C2
COC1=C(C(=CC=C1)OC)C(=O)OCC2=CC=CC=C2
C1=CC=C(C=C1)COC=O
COC1=C(C(=C(C=C1)OC)O)C(=O)OCC2=CC=CC=C2
COC1=CC=CC(=C1C(=O)OCC2=CC=CC=C2)O
C1=CC=C(C=C1)CN=C=S
C1=CC=C(C=C1)COC(=O)C2=CC=CC=C2O
C1=CC=C(C=C1)CSC#N
C1=CC=C(C=C1)CC2=C(C=C3C(=C2O)C(=O)C4=CC=CC=C4C3=O)O
CN1CCC2=CC(=C3C=C2C1CC4=CC(=CC=C4)OC5=C(C=CC(=C5)CC6C7=C(O3)C(=C(C=C7CCN6C)OC)OC)O)OC
C[NH+]1CCC2=CC(=C(C=C2[C@@H]1CC3=CC=C(C=C3)OC4=C(C=CC(=C4)C[C@@H]5C6=CC(=C(C=C6CC[NH+]5C)OC)O)O)O)OC
COC1=C(C2=C[N+]3=C(C=C2C=C1)C4=CC5=C(C=C4C(C3)O)OCO5)OC
[3H]C1OC2=C(O1)C=C3C(=C2)CC[N+]4=C3C=C5C=CC(=C(C5=C4)OC)OC
COC1=C(C2=C[N+]3=C(C=C2C=C1)C4=CC5=C(C=C4CC3)OCO5)O
CC(=CCC/C(=C/COC1=C2C=CC(=O)OC2=CC3=C1C=CO3)/C)C
COC1=C2C=CC(=O)OC2=CC3=C1C=CO3
C1=CC(=O)OC2=CC3=C(C=CO3)C(=C21)O
COC1=C(C=C2C(=C1O)[C@H]3C([C@H]([C@@H]([C@H](O3)CO)O)O)OC2=O)O
C/C=C(\C)/C(=O)OC1[C@@H](C2([C@@H](C[C@@]3(C(=CC[C@H]4C3(CC[C@@H]5C4(CCC(C5(C)C)OC6C([C@H](C([C@H](O6)C(=O)O)O)OC7C([C@H]([C@H]([C@H](O7)CO)O)OC8C(C([C@H](C(O8)C)O)O)O)O)O[C@H]9[C@@H](C([C@@H](C(O9)CO)O)O)O)C)C)C2CC1(C)C)C)O)CO)O
C/C=C(\C)/C(=O)OCC12[C@@H](C[C@@]3(C(=CC[C@H]4C3(CC[C@@H]5C4(CCC(C5(C)C)OC6C([C@H](C([C@H](O6)C(=O)O)O)OC7C([C@H]([C@H]([C@H](O7)CO)O)OC8C(C([C@H](C(O8)C)O)O)O)O)O[C@H]9[C@@H](C([C@@H](C(O9)CO)O)O)O)C)C)C1CC(C([C@@H]2O)O)(C)C)C)O
CC1[C@@H](C(C(C(O1)O[C@H]2[C@H]([C@H](OC(C2O)O[C@H]3C([C@H](OC(C3O[C@H]4[C@@H](C([C@@H](C(O4)CO)O)O)O)OC5CCC6([C@H](C5(C)C)CCC7([C@@H]6CC=C8[C@]7(C[C@H](C9(C8CC(C(=O)C9)(C)C)CO)O)C)C)C)C(=O)O)O)CO)O)O)O)O
CC[C@H](/C=C/[C@@H](C)[C@H]1CC[C@@H]2[C@@]1(CC[C@H]3C2=CC[C@@H]4[C@@]3(CC[C@@H](C4)O)C)C)C(C)C
CC1CCC2(C(C3[C@]4(CCC5C(C4CC3(O2)OC)CC=C6[C@@]5(CC[C@@H](C6)O)C)C)C)OC1
C[N+]1(C[C@H](C[C@@H]1C(=O)[O-])O)C
CC(=CCC[C@@](C)([C@H]1CC[C@]2([C@@H]1[C@@H](C[C@H]3[C@]2(CCC4[C@@]3(CC[C@H](C4(C)C)O)C)C)O)C)O)C
COC1=CC=C(C=C1)C2=C(C(=O)C3=C(C(=C(C=C3O2)O)OC)O)O
CC(=C)[C@@H]1CC[C@]2([C@H]1C3CC[C@@H]4[C@]5(CC[C@@H](C([C@@H]5CC[C@]4([C@@]3(CC2)C)C)(C)C)O)C)CO
CC(=C)C1CCC2(C1C3CCC4C5(CCC(C(C5CCC4(C3(CC2)C)C)(C)C)O)C)C=O
CC1=C(C2=C(C3=C1OC4=C([C@@H]3C(C)C)C(=O)C(C(=C4C)OC)(C)C)O[C@@H](CC2=O)C5=CC=CC=C5)O
CC1=C(C2=C(C3=C1OC4=C(C3C5=CC=CC=C5)C(=O)C(C(=O)C4(C)C)(C)C)OC(CC2=O)C6=CC=CC=C6)O
COC1=CC2=C(C=C1)C3=NC=CC4=CC(=CC(=C43)C2=O)OC
COC1=CC2=C(C=C1)C3=NC=CC4=CC5=C(C(=C43)C2=O)OCO5
C1CC(=C/C(=N/O)/C1)C2=CC=CC=C2
C1=CC(=CC=C1C2=CC(=O)C3=C(O2)C(=C(C=C3O)O)C4=C(OC5=CC(=CC(=C5C4=O)O)O)C6=CC=C(C=C6)O)O
CN1CCC2=CC3=C(C=C2[C@H]1C4C5=C(C6=C(C=C5)OCO6)C(=O)O4)OCO3
CC1CCCC2(C1=CC(=C(C)C)CC2)C
CC1=CCC/C(=C/[C@H]2[C@H](C2(C)C)CC1)/C
C1CCC(CC1)C2CCCCC2
CC1=CC2=C(C=C1)NC3=C4C5C6C(C5(C)C)CCC6(OC4=C(C=C23)C)C
CC1=C2C(=C3C(=C1)C4=CC=CC=C4N3)C5C6C(C5(C)C)CCC6(O2)C
C1=C(C=C(C=C1O)OC2=C(C=C(C3=C2OC4=C(C=C(C(=C4O3)C5=C6C(=C(C=C5O)O)OC7=C(O6)C(=CC(=C7OC8=CC(=CC(=C8)O)O)O)O)O)O)O)O)O
C1=C(C=C(C=C1O)OC2=C(C=C(C3=C2OC4=C(C(=C(C=C4O3)O)C5=C(C=C6C(=C5O)OC7=C(O6)C(=CC(=C7OC8=CC(=CC(=C8)O)O)O)O)O)O)O)O)O
CCCCCCCCCCCCCCCCCCCCCCC[C@@H]1[C@H]([C@H](C(=O)O1)O)O
CC1=CC(=O)C2=C(C(=C(C=C2O1)O)C3C(C(C(C(O3)CO)O)O)O)O
CC1(C=CC2=C(O1)C=CC3=C2OC4=C(C3=O)C(=CC(=C4O)OC5C(OC6=CC(=C7C(=C56)OC8=C(C7=O)C=CC(=C8O)O)O)C(C)(C)O)O)C
CCN1C[C@@]2(CC[C@@H]([C@@]34[C@@H]2[C@H]([C@@H](C31)[C@]5(C[C@@H]([C@]6(C[C@@H]4[C@@H]5[C@H]6OC(=O)C7=CC(=C(C=C7)OC)OC)O)OC)OC(=O)C)OC)OC)COC
C1=CC(=CC2=NC(=CC3=CC=C(N3)C=C4C=CC=N4)C=C2)N=C1
CC1=C(N=C(C1CCC(=O)O)CC2=NC(=C(C2CCC(=O)O)C)C=C3C(=C(C(=O)N3)C)C=C)C=C4C(=C(C(=O)N4)C=C)C
CC\1=C(/C(=C/C2=C(C(=C(N2)/C=C\3/C(=C(C(=O)N3)C)C=C)C)CCC(=O)[O-])/N/C1=C\C4=NC(=O)C(=C4C)C=C)CCC(=O)[O-]
CC1=CC[C@@H](CC1O)C2=COC(=C2)CC(C)C
CC1=CC[C@@H](CC1=O)C2=COC(=C2)CC(C)C
COC1=C(C=C(C=C1)C2=CC(=O)C3=C(C=C(C=C3O2)O)O)C4=C(C=C(C5=C4OC(=CC5=O)C6=CC=C(C=C6)O)O)O
CCCCCC/C=C/CCCCCCCC1=CC(=CC(=C1)O)O
CC1CC2=CC(=C(C(=C2C3=C(C4=C(C=C3C(C1C)O)OCO4)OC)O)OC)OC
COC1=CC=C(C=C1)C2=COC3=C(C2=O)C(=CC(=C3)O)[O-]
COC1=CC=C(C=C1)C2COC3=CC(=CC(=C3C2=O)O)O[C@H]4[C@@H]([C@H]([C@@H]([C@H](O4)CO)O)O)O
C1=CC(=CC=C1/C=C/C(=O)OC[C@@H]2[C@H]([C@@H]([C@H]([C@@H](O2)OC3=CC(=C4C(=C3)OC(=C(C4=O)O)C5=CC=C(C=C5)O)O)O)O)O)O
C[C@@H]([C@H](C1=CN=C2C(=N1)C(=O)N=C(N2)N)O)O
C1C2=C([C@@H](S1)CCCCC(=O)O)NC(=O)N2
C[C@@H]1CCC2(CC[C@@]3(C(=CC[C@H]4[C@]3(CC[C@@H]5[C@@]4(CCC(=O)C5(C)C)C)C)C2[C@H]1C)C)C(=O)O
CC1=C(C(=O)C2=C(C1=O)C=CC=C2O)C3=C(C(=O)C4=C(C3=O)C(=CC=C4)O)C
CC1=CCC(CC1)[C@](C)(CCC=C(C)C)O
CC1=CC[C@H](CC1)[C@@]2(CC[C@@H](C(O2)(C)C)O)C
CC(=CCC[C@@](C)([C@@H]1CCC(=CC1)C(=O)OC)O)C
CC1=CC=C(C=C1)[C@H](C)CC(C=C(C)C)O
C[C@@H]1[C@H]([C@H]([C@@H]1C2=CC(=C(C=C2OC)OC)OC)C3=CC(=C(C=C3OC)OC)OC)C
C1=CC(=CC=C1/C=C/C(=C/C(=O)/C=C/C2=CC=C(C=C2)O)/O)O
CC1=CC(=C(C(=C1)CC(C)C)O)CC(C)C
C1=CC(=CC=C1/C=C/C(=O)CC(=O)/C=C/C2=CC=C(C=C2)O)O
COC1=C(C=CC(=C1)/C=C/C=C/C(=O)/C=C/C2=CC(=C(C=C2)O)OC)O
C1=CC(=CC=C1CCC(=O)CC(=O)C=CC2=CC=C(C=C2)O)O
CC1=CC(=C2C(=O)C=CC(=O)C2=C1C3=C(C=C4C(=O)C=C(C(=O)C4=C3O)C5=CC(=O)C6=CC(=C(C(=C6C5=O)O)C7=C8C(=O)C=CC(=O)C8=C(C=C7C)O)C)C)O
CC1=C2C(=C3C(=C1)C4=CC(=C(C(=C4N3)C5=C6C(=CC(=C5O)OC)C7=CC(=C8C(=C7N6)C=CC(O8)(C)C)C)O)OC)C=CC(O2)(C)C
CN1[C@H]2CC3=CC(=C(C=C3C1CC4=CC(=C(C=C24)O)OC)OC)O
C1[C@@H]([C@H](OC1=O)COP(=O)(O)OP(=O)(O)OP(=O)(O)O)OP(=O)(O)OP(=O)(O)OP(=O)(O)O
C/C(=C\C=C\C=C(/C)\C=C\C=C(/C)\C=C\C(=O)OC)/C=C/C=C(\C)/C=C/C(=O)[O-]
C1C(OC(C(C1O)C(CC(CCC2=CC=C(C=C2)O)O)C=CC3=CC=C(C=C3)O)C4=CC=C(C=C4)O)CCC5=CC=C(C=C5)O
C1C(OC2CC(OC(C2C1C=CC3=CC=C(C=C3)O)C4=CC=C(C=C4)O)CCC5=CC=C(C=C5)O)CCC6=CC=C(C=C6)O
COC1=CC(=C(C(=C1C(=O)C=CC2=CC=C(C=C2)O)O)C3CC(OC(C3C(C=CCC(CCC4=CC=C(C=C4)O)O)C5=CC=C(C=C5)O)C6=CC=C(C=C6)O)CCC7=CC=C(C=C7)O)O
COC1=CC(=C(C2=C1C3=C(C=C2)C=C(C=C3)O)C4=C5CCC6=C(C5=C(C=C4O)OC)C=CC(=C6)O)O
C1=CC(=CC=C1/C=C/C(=O)OCC2=C(C(=O)C=CO2)O[C@H]3[C@H]([C@H]([C@@H](C(O3)CO)O)O)O)O
COC1=C(C=CC(=C1)/C=C/C(=O)OCCCC2=CC(=C3C(=C2)[C@H]([C@@H](O3)C4=CC(=C(C=C4)O)OC)COC(=O)/C=C/C5=CC(=C(C=C5)O)OC)OC)O
CC1=C(C=C2C(=C1O)C(=O)C3=C(O2)C(OC4=CC=CC=C43)OC)O
CC1=C(C=C2C(=C1O)C(=O)C3=C(O2)C(OC4=CC=CC=C43)O)O
CC1=C(C=C2C(=C1O)C(=O)C3(C(O2)COC4=C3C=CC=C4O)O)OC
CC1=C(C=C2C(=C1O)C(=O)C3=C(O2)C(OC4=C3C=CC(=C4)O)OC)O
CC1=C(C=C2C(=C1O)C(=O)C3=C(O2)C(OC4=C3C=CC(=C4)O)O)O
CC1=C(C=C2C(=C1O)C(=O)C3=C(O2)C(=O)OC4=C3C=CC(=C4)O)O
CN1CCC2=CC(=C(C3=C2[C@H]1CC4=CC(=C(C=C43)OC)O)OC)O
COC1=CC(=C(C=C1)C2=CC3=C(O2)C=C(C=C3)O)O
C[C@@]12CCC(C1(C)C)C[C@H]2OC(=O)/C=C/C3=CC(=C(C=C3)O)OC
CC1([C@@H]2CCC1([C@H](C2)O)C)C
C[C@@]12CC[C@@H](C1(C)C)C[C@@H]2O
C[C@]12CC[C@H](C1(C)C)CC2O
CC(=O)O[C@H]1C[C@H]2CCC1(C2(C)C)C
C[C@]12CC[C@H](C1(C)C)C[C@H]2OC(=O)/C=C/C3=CC=CC=C3
C[C@@]12CC[C@@H](C1(C)C)C=C2
CC(C)CC(=O)O[C@@H]1CC2CC[C@]1(C2(C)C)C
C[C@]12CC[C@H](C1(C)C)C[C@H]2OC(=O)/C=C/C=C/C3=CC4=C(C=C3)OCO4
CC1CCC2C1C(OC=C2C=O)O[C@H]3[C@@H]([C@H]([C@@H]([C@H](O3)CO)O)O)O
C[C@@H]1CCC2=C1C=NC=C2C=O
C[C@@H]1CC[C@H]2[C@@H]1COC(=O)C2
COC1=CC(=O)C(=CC1=O)C2=COC3=C(C2=O)C=CC(=C3)O
CC(C)CNC(=O)/C=C/C=CCCCCCCC/C=C/CC1=CC2=C(C=C1)OCO2
CC(C)CNC(=O)/C=C/C=CCCCCCCCCC/C=C/C1=CC2=C(C=C1)OCO2
CC(C)CNC(=O)/C=C/C=CCCCCCCCCCCCC1=CC2=C(C=C1)OCO2
COC1CCC(=O)N1[C@@H]2C=C(CO2)COC(=O)C3=CC=CN3
C1=CNC(=C1)C(=O)O[C@H]2[C@@H]([C@H]([C@@H]([C@H](O2)CO)O)O)O
COC1=C(OC2=CC(=CC(=C2C1=O)O)O[C@H]3C([C@H]([C@@H](C(O3)C(=O)O)O)O)O)C4=CC=C(C=C4)O
C[C@H]1CCC2=C(CC(C[C@H]12)(C)C)C(=C)C
C1C2=CC(=C(C=C2C3C1(COC4=C3C=CC(=C4)O)O)O)O
C[C@H](/C=C/[C@H](C)C(C)C)C1CCC2[C@@]1(CCC3C2CC=C4[C@@]3(CC[C@@H](C4)O)C)C
C1=CC=C2C(=C1)C3=CNSC3=N2
C[C@@H]([C@H]1CC[C@@H]2[C@@]1(CC[C@H]3[C@H]2CO[C@@H]([C@@H]4[C@@]3(C[C@H]([C@H](C4)O)O)C)O)C)[C@H]([C@@H]([C@@H](C)C(C)C)O)O
C[C@H]1CCC/C=C/C2C[C@@H](C[C@H]2[C@@H](/C=C/C(=O)O1)O)O
C1CC(=O)C2=C1C3=C(C(=C(C=C3C(=O)O2)O)O)O
CC1=C2[C@H]([C@@H]([C@@]3([C@H](C[C@@H](C(=C)C3C[C@@]2(C[C@@H]1O)C(C)(C)O)O)OC(=O)C)C)OC(=O)C)OC(=O)C4=CC=CC=C4
C1=CC(=CC=C1C2=CC(=O)C3=C(C(=C(C=C3O2)O[C@H]4[C@@H]([C@H]([C@@H]([C@H](O4)C(=O)O)O)O)O)O)O)O
C[C@@H]1C[C@H]2[C@H]([C@@H]([C@]3([C@H]1[C@H](C[C@H]3O)OC(=O)C)C)OC(=O)C)C(=C)C(=O)O2
CC1=CC[C@@]2(CC1)C(=C)C[C@H]([C@H](C2(C)C)Br)O
COC1=CC=C(C=C1)[C@@H]2CCC3=C(O2)C=C(C=C3)O
CC(=CCC1=C(C=C(C(=C1)C(=O)/C=C/C2=CC(=C(C=C2)O)O)O)O)C
CC(=CCC1=C2C(=C(C3=C1OC(=C(C3=O)OC)C4=CC(=C(C=C4)O)O)O)C=CC(O2)(C)C)C
CC(=CCC1=C(C2=C(C(=C1O)CC=C(C)C)OC(=C(C2=O)OC)C3=CC(=C(C=C3)O)O)O)C
CC(=CCC1=C(C(=C(C=C1C2=C(C(=O)C3=C(O2)C(=C(C=C3O)O)C(C)(C)C=C)O)O)O)CC=C(C)C)C
CC(=CCC1=C2C=CC(OC2=C(C=C1C3=C(C(=O)C4=C(O3)C(=C(C=C4O)O)C(C)(C)C=C)O)O)(C)C)C
CC(=CCC1=C(C=CC(=C1)C2=C(C(=O)C3=C(O2)C(=C(C=C3O)O)CC=C(C)C)O)O)C
COC1=CC(=C(C=C1)CCCC2=CC=C(C=C2)O)O
COC1=C(C=CC(=C1)O)CCCC2=CC=C(C=C2)O
CC(=CCC1=C(C=CC(=C1)CCCC2=CC(=CC(=C2)O)O)O)C
COC1=CC(=C(C=C1)CCCC2=CC(=C(C=C2)OC)O)O
COC1=CC(=C(C=C1)CCCC2=CC(=C(C=C2)O)OC)OC
CC1(C=CC2=C(O1)C(=CC(=C2)C3=C(C(=O)C4=C(O3)C(=C(C=C4O)O)C(C)(C)C=C)O)O)C
CC1C(C2=C3C(=C(C=C2O1)O)C(=O)C(=C(O3)C4=CC5=C(C(=C4)O)OC(C=C5)(C)C)O)(C)C
CC1C(C2=C3C(=C(C=C2O1)O)C(=O)C(=C(O3)C4=CC(=C(C(=C4)O)O)CC=C(C)C)O)(C)C
CC(=CCC1=C(C(=CC(=C1)C2=C(C(=O)C3=C(O2)C(=C(C=C3O)O)CC=C(C)C)O)O)O)C
CC(=CCC1=C(C(=CC(=C1)C2=C(C(=O)C3=C(C(=C(C=C3O2)O)CC=C(C)C)O)O)O)O)C
CCN1C[C@@]2(CC[C@@H]([C@@]34[C@@H]2[C@@H]([C@](C31)([C@]5(C[C@@H]([C@H]6C[C@@H]4[C@@H]5[C@H]6O)OC)O)O)OC)OC)COC
CC1=C(C(=O)C[C@]2([C@@H]1C[C@@H]3[C@]45[C@@H]2[C@H]([C@@H]([C@]([C@@H]4[C@H](C(=O)O3)OC(=O)C6=CC=CC=C6)(OC5)C(=O)OC)O)O)C)O
CC1=C(C(=O)C[C@]2([C@H]1C[C@@H]3[C@]45[C@@H]2[C@H]([C@H]([C@@]([C@@H]4[C@H](C(=O)O3)OC(=O)/C=C(\C)/C(C)C)(OC5)C(=O)OC)O)O)C)O
CC1=C(C(=O)C[C@]2([C@H]1C[C@@H]3[C@]45[C@@H]2[C@H]([C@@H]([C@@]([C@@H]4[C@H](C(=O)O3)OC(=O)/C=C(\C)/C(C)(C)OC(=O)C)(OC5)C(=O)OC)O)O)C)O
C[C@H]1[C@@H]2C[C@@H]3[C@@]45CO[C@@]([C@@H]4[C@H](C(=O)O3)OC(=O)/C=C(\C)/C(C)C)([C@H]([C@@H]([C@@H]5[C@]2(C=C(C1=O)OC6C(C(C(C(O6)CO)O)O)O)C)O)O)C(=O)OC
CC1=C(C(=O)C[C@]2([C@H]1C[C@@H]3[C@]45[C@@H]2[C@H]([C@@H]([C@]([C@@H]4[C@H](C(=O)O3)OC(=O)CC(C)C)(OC5)C(=O)OC)O)O)C)O
CC1=C(C(=O)C[C@]2(C1CC3[C@]45C2C([C@@H]([C@@](C4[C@H](C(=O)O3)OC(=O)C)(OC5)C(=O)OC)O)O)C)O
CC1=C(C(=O)C[C@]2([C@H]1C[C@@H]3[C@]45[C@@H]2[C@H]([C@@H]([C@]([C@@H]4[C@H](C(=O)O3)OC(=O)/C=C(/C)\C(C)(C)O)(OC5)C(=O)OC)O)O)C)O
CC1=CC(=O)C([C@]2([C@H]1C[C@@H]3C45[C@@H]2C([C@@H](C(C4(C(C(=O)O3)O)O)(OC5)C)O)O)C)O
CC1=C[C@@H](C(C2([C@H]1C[C@@H]3C45C2C(C(C([C@@]4(C(C(=O)O3)O)O)(OC5)C)O)O)C)O)O
CC1=C[C@@H]([C@H]([C@]2([C@H]1C[C@@H]3[C@]45[C@@H]2[C@H]([C@@H](C([C@@]4([C@H](C(=O)O3)O)O)(OC5)CO)O)O)C)O)O
CC1=CC(=O)C[C@]2([C@H]1[C@H]([C@@H]3[C@]45[C@@H]2[C@H]([C@@H](C([C@H]4[C@H](C(=O)O3)O)(OC5)C)O)O)O)C
CC1=CC(=O)[C@H]([C@]2([C@H]1C[C@@H]3[C@]45[C@@H]2[C@H]([C@@H]([C@]([C@@]4([C@H](C(=O)O3)O)O)(OC5)CO)O)O)C)O
CCOC(=O)[C@@]12[C@@H]3CC(=O)O[C@H]4[C@]3(CO1)C([C@H](C2O)O)[C@]5(CC(=O)C(=C(C5C4)C)O)C
CC1=C(C(=O)C[C@@]2([C@H]1C[C@@H]3[C@]45C2[C@H]([C@@H]([C@@]([C@@H]4[C@H](C(=O)O3)O)(OC5)C(=O)OC)O)O)C)O
CC1[C@@H]2C[C@@H]3[C@@]45CO[C@@]([C@@H]4[C@H](C(=O)O3)OC(=O)C=C(C)C)([C@H]([C@@H]([C@@H]5[C@]2(C=C(C1=O)OC6C(C(C(C(O6)CO)O)O)O)C)O)O)C(=O)OC
CC1=C(C(=O)C[C@]2([C@@H]1C[C@@H]3[C@]45[C@@H]2[C@H]([C@@H]([C@]([C@@H]4[C@H](C(=O)O3)OC(=O)C=C(C)C)(OC5)C(=O)OC)O)O)C)O[C@H]6[C@@H]([C@H]([C@@H]([C@H](O6)CO)O)O)O
CC1=C(C(=O)C[C@]2([C@H]1[C@H]([C@@H]3[C@]45[C@@H]2[C@H]([C@@H](C([C@@H]4CC(=O)O3)(OC5)C(=O)OC)O)O)OC(=O)C=C(C)C)C)O[C@H]6[C@@H]([C@H]([C@@H]([C@H](O6)CO)O)O)O
COC1=C(C=C2C(=C1)C34CCN5C3CC6C7C4N2C(=O)CC7OCC=C6CCCC5)OC
CC1=C(C(=O)C[C@]2([C@H]1C[C@@H]3[C@]45[C@@H]2[C@H]([C@@H]([C@@]([C@@H]4[C@H](C(=O)O3)OC(=O)C=C(C)C)(OC5)C(=O)OC)O)O)C)O
CC1(CCC2=C(O1)C=C3C(=C2O)C(=O)C4=C5CCC(OC5=C(C=C4O3)O)(C)C)C
C[C@@]12C[C@H]([C@@H]([C@]1(CC(=O)[C@@]3([C@H]2CC=C4[C@H]3C=C(C(=O)C4(C)C)O[C@H]5[C@@H]([C@H]([C@@H]([C@H](O5)CO)O)O)O)C)C)[C@@](C)(C(=O)CCC(C)(C)O)O)O
C[C@]12C[C@H]([C@H]3[C@H]([C@]1(CC[C@@H]2C4=COC(=O)C=C4)O)CC[C@@]56[C@@]3([C@H]7C[C@@H](C5)O[C@](O7)(O6)C)C=O)O
CC(=O)O[C@@H]1C[C@@H](C[C@@]2([C@@]13[C@@H]4[C@@H](CC2)[C@]5(CC[C@@H]([C@]5(C[C@H]4O[C@@H]3O)C)C6=COC(=O)C=C6)O)O)O
C/C/1=C/CCC(=C)C2CC(C2C(C1=O)OC(=O)C)(C)C
C/C=C(\C)/C(=O)O[C@@H]1C[C@@]2(C(=O)C=C(O2)/C(=C\[C@@H]3[C@@H]1C(=C)C(=O)O3)/CO)C
CCCCCCCCCCCCCCCC1CC(=O)NCCCNCCCCNCCCN1
C[C@]12CC[C@H]3[C@H]([C@H]1CC[C@@H]2C4=COC(=O)C=C4)CCC5[C@@]3(CCCC5)C
C[C@]12CC[C@@H](C[C@H]1CC[C@@H]3[C@@H]2CC[C@]4([C@]3(CC[C@H]4C5=COC(=O)C=C5)O)C)O
C[C@]12CC[C@@H](C[C@H]1CCC3C2CC[C@]4([C@@]3(CC[C@@H]4C5=COC(=O)C=C5)O)C)OC(=O)CCCCC(=O)O
C[C@]12CC[C@@H](C[C@H]1CC[C@@H]3[C@@H]2C(=O)[C@@H]([C@]4([C@@]3(CC[C@@H]4C5=COC(=O)C=C5)O)C)O)O
C[C@]12CC[C@H]3C([C@]1(CC[C@@H]2C4=COC(=O)C=C4)O)CC[C@]5([C@@]3(CC[C@@H](C5)O)C=O)O
CC(=O)O[C@H]1C[C@@]2([C@@H]3CC[C@@H]4C[C@H](CC[C@@]4([C@H]3CC[C@@]2([C@H]1C5=COC(=O)C=C5)C)C)O)O
CC12CC[C@H]3C(C14C(O4)CC2C5=COC(=O)C=C5)CCC6(C3(CCC(C6)O)C=O)O
CC(=O)OC1CC2(C3CCC4CC(CCC4(C3CCC2(C1C5=COC(=O)C=C5)C)C)OC(=O)CCC(=O)NC(CCCN=C(N)N)C(=O)O)O
C[N+](C)(C)CCC1=CNC2=C1C=C(C=C2)[O-]
C[NH+](C)CCC1=CNC2=C1C=C(C=C2)O
C[N+]1(CCC2=CNC3=C2C1=C(C=C3)OS(=O)O)C
CC(=O)O[C@H]1C[C@@]2([C@@H]3CC[C@@H]4C[C@H](CC[C@@]4([C@H]3CC[C@@]2([C@H]1C5=COC(=O)C=C5)C)C)OC(=O)CCCCCCC(=O)N[C@@H](CCCN=C(N)N)C(=O)O)O
CC(=O)OCC1C23C=C[C@H](CC2N(CC4=CC5=C(C=C34)OCO5)CO1)OC
CN1CCC2=CC3=C(C4=C2[C@@H]1CC5=C4C(=C(C=C5)OC)O)OCO3
CCCCCCCCCC[C@H]([C@@H]1CC[C@H](O1)[C@@H]2CC[C@H](O2)[C@@H](CCCCCCCCCC(CC3=CC(OC3=O)C)O)O)O
CCCCCCCCCC[C@@H]([C@H]1CC[C@H](O1)[C@H](CC[C@@H]([C@@H]2CC[C@@H](O2)CCCCCCC[C@H](CC3=C[C@@H](OC3=O)C)O)O)O)O
CCN1CC2(CCC(C34C2C(C(C31)C5(CC(C6CC4C5C6O)OC)O)OC)O)COC
CCN1C[C@@]2(CCC(C34C2C(C(C31)[C@]5(C[C@@H](C6CC4C5C6OC(=O)C)OC)O)OC)O)COC
CCN1C[C@@]2(CCC(C34[C@@H]2C(C(C31)[C@@]56[C@@H]([C@@H](C7CC4C5C7O)OC)OCO6)OC)O)COC
CC(=O)O[C@@H]1C[C@@H]2[C@]([C@@H](C[C@H](C2(C)C)OC(=O)C)OC(=O)C)([C@@H]3[C@@]14C[C@H]([C@@H]([C@H]3OC(=O)C)O)C(=C)C4=O)C
C1=CC(=CC=C1CCO)OOC2=CC=C(C=C2)CCO
CC(=O)C1=C(C=CC(=C1)O)O[C@H]2[C@@H]([C@H]([C@@H]([C@H](O2)CO)O)O)O
CC(=O)C1=C(C=C(C=C1)O)O[C@H]2[C@@H]([C@H]([C@@H]([C@H](O2)CO)O)O)O
CC(=O)C1=CC=C(C=C1)O[C@H]2[C@@H]([C@H]([C@@H]([C@H](O2)CO[C@H]3[C@@H]([C@H]([C@@H](CO3)O)O)O)O)O)O
CC(=O)C1=C(C=C(C=C1)O[C@H]2[C@@H]([C@H]([C@@H]([C@H](O2)CO[C@H]3[C@@H]([C@H]([C@@H](CO3)O)O)O)O)O)O)O
CCCC(=O)CC/C=C/C=C/C#CC#C/C=C\CO
C[C@@H]1[C@@H]([C@@H]([C@H]([C@H](O1)OC2CC[C@]3(C([C@]2(C)CO)CC[C@@]4(C3C(C=C5[C@]4(C[C@@H](C6(C5CC(CC6)(C)C)CO)O)C)OC)C)C)O)O[C@H]7[C@@H]([C@H]([C@@H]([C@H](O7)CO)O)O)O)O
C[C@@H]1[C@@H]([C@@H]([C@H]([C@@H](O1)O[C@H]2CC[C@]3(C([C@]2(C)CO)CC[C@@]4(C3OC=C5[C@]4(CC(C6(C5CC(CC6)(C)C)CO)O)C)C)C)O)O[C@H]7[C@@H]([C@H]([C@@H]([C@H](O7)CO)O)O)O)O
C[C@@H]1[C@@H]([C@@H]([C@H]([C@@H](O1)O[C@H]2CC[C@]3(C([C@]2(C)CO)CC[C@@]4(C3[C@@H](CC5C4C[C@@H]([C@@]6(C5=CC(CC6)(C)C)CO)O)O)C)C)O)O[C@H]7[C@@H]([C@H]([C@@H]([C@H](O7)CO)O)O)O)O
C[C@@H]1[C@H]([C@@H]([C@H]([C@@H](O1)O[C@H]2CC[C@]3(C(C2(C)C)CC[C@@]4(C3C(C=C5[C@]4(C[C@@H]([C@@]6(C5CC(CC6)(C)C)CO)O)C)OC)C)C)O)O[C@H]7[C@@H]([C@H]([C@@H]([C@H](O7)CO)O)O)O)O
CCC[C@@H](CC/C=C/C=C/C#CC#C/C=C\CO)O
CCCCCC/C=C/C=C/C#CC#CC/C=C\CO
C[C@@H]1[C@H](OC2=CC(=O)C(=C[C@@]12CC=C)OC)C3=CC4=C(C=C3)OCO4
COC1=CC(=CC(=C1OC)OC)C[C@@H]2COC[C@H]2CC3=CC4=C(C=C3)OCO4
CC(C)(C=C)C1=C(C=C2C(=C1)C=C(CO2)C3=C(C=C(C=C3)O)OC)O
CC(C)(C=C)C1=C(C=C2C(=C1)C=C(O2)C3=C(C=C(C=C3)O)OC)O
CC(=CCC1=C(C(=CC(=C1)[C@@H]2CC(=O)C3=C(C=C(C=C3O2)O)O)/C=C/C(=C)C)OC)C
C=CC#CC1=CC=C(S1)C#CC#C
C#CC#CC1=CC=C(S1)C#CC(CCl)O
C1=CC(=C(C=C1/C=C\C(=O)C2=C(C=C(C=C2)O)O)O)O
CC/C=C/N=C=S
C=CC#CC1=CC=C(S1)C2=CC=CS2
C1C(OC2=C(C1=O)C=CC(=C2)O)C3=CC(=C(C=C3)O)O
C1[C@H](OC2=C(C1=O)C=CC(=C2)OC3C(C(C(C(O3)CO)O)O)O)C4=CC(=C(C=C4)O)OC5C(C(C(C(O5)CO)O)O)O
CCCC=O
CCCCOC(=O)NC(=O)N
CCCCC1CCCCC1
CCCCC1C2=C(CCCC2)C(=O)O1
CCCCOC(=O)C1=CC=CC=C1C(=O)OCC(CC)CC
CCCCC1(C2=C(C(C(CC2)O)O)C(=O)O1)O
CCCC=C1CCCCC1
CCCCN=C=S
CC[C@@H](C)N=C=S
CCCC(=O)C1=C(C(=C(C(=C1O)CC=C(C)C)O)CC2=C(C(=C(C(=C2OC)C)O)C(=O)C)O)O
CCCC(=O)O[C@@H]1C[C@@]23[C@@]4(CO[C@@]([C@H]4C)(C[C@]2([C@@H]1C)CC(=O)O3)O)C
C[C@@H]([C@H]1CC[C@@]2([C@@]1(CC=C3[C@H]2CC[C@@H]4C(=C3)CC[C@@H](C4(C)C)N(C)C)C)C)N
C[C@@H]([C@H]1C(CC2([C@@]1(CC=C3[C@H]2CCC4C(=C3)CC[C@@H](C4(C)C)N(C)C)C)C)O)N
CC(C1CC[C@@]2([C@@]1(CCC34C2CCC5C3(C4)CCCC5(C)C)C)C)N(C)C
CC(C1C(C[C@@]2([C@@]1(CCC34C2CCC5C3(C4)C=CC(=O)C5(C)C)C)C)O)N(C)C
C/C=C\1/C(=O)C[C@@]2([C@@]1(CCC34C2CCC5C3(C4)CCC(C5(C)C)N(C)C)C)C
CC(C1CC[C@@]2([C@@]1(CCC34C2C=CC5C3(C4)CCC(C5(C)C)N(C)C)C)C)NC(=O)C
C[C@@H](C1CC[C@@]2([C@@]1(CCC34C2C=CC5C3(C4)CCC(C5(C)C)N(C)C)C)C)N
CC(C)([C@H](COC1=C2C(=C(C3=C1OC(=O)C=C3)OC)C=CO2)O)O
CC1([C@H](O1)COC2=C3C(=C(C4=C2OC(=O)C=C4)OC)C=CO3)C
COC(=O)C1=COC(C2[C@@H]1CC34CC2CN3CCC5=C4NC6=CC=CC=C56)O[C@H]7[C@@H]([C@H]([C@@H]([C@H](O7)CO)O)O)O
C(CCN)CCN.Cl
C[C@H]1CCC2[C@@H](C1)C(CC=C2C)C(=C)C
CC1=C[C@@H]2[C@H](CCC(=C)[C@H]2CC1=O)C(C)C
CC1=C[C@H]2[C@@H](CC[C@]([C@@H]2CC1)(C)O)C(C)C
CC(=O)OC1C2[C@@H]3C(CC4=C(C3C(=O)O2)C=CO4)[C@@]5(C1(C(CC(C5O)O)(C)C)O)C
CC(=O)O[C@H]1CCC([C@]2([C@]1([C@H]3CC4=C(C=CO4)[C@@H]5[C@@H]3[C@H](C2)OC5=O)C)O)(C)C
CC(=O)O[C@H]1CCC([C@]2([C@]1([C@H]3CC4=C(C=CO4)[C@]([C@@H]3[C@H]([C@@H]2OC(=O)C)OC(=O)C)(C)O)C)O)(C)C
CC(=O)O[C@H]1CCC([C@]2([C@]1([C@H]3CC4=C(C=CO4)[C@@]([C@@H]3[C@H]([C@@H]2OC(=O)C)OC(=O)C)(C)O)C)O)(C)C
CC(=O)O[C@H]1CCC([C@]2([C@]1([C@H]3CC4=C(C=CO4)[C@@](C3[C@H]([C@@H]2OC(=O)C)OC(=O)C)(C)OC)C)O)(C)C
C[C@]12[C@H](CCC([C@@]1(C[C@H]3[C@@H]4[C@@H]2CC5=C([C@H]4C(=O)O3)C=CO5)O)(C)C)O
CC(=O)[C@H]1[C@H]2[C@H](CC3=C1C=CO3)[C@]4([C@H](CCC([C@@]4(C[C@@H]2O)O)(C)C)OC(=O)C)C
C[C@@]12CCC3=C([C@H]1CC[C@]45[C@H]2CC[C@@H](C4)[C@](C5)(CO)O)C=CO3
C1=CC(=C(C=C1/C=C\C(=O)O)O)O
CCC(=O)O[C@@](CC1=CC=CC=C1)(C2=CC=CC=C2)[C@H](C)CN(C)C.CC(=O)OC1=CC=CC=C1C(=O)O.CN1C=NC2=C1C(=O)N(C(=O)N2C)C.Cl
C1=CC(=CC=C1O)O[C@H]2[C@@H]([C@H]([C@@H]([C@H](O2)CO)O)O)OC(=O)/C=C/C3=CC(=C(C=C3)O)O
C1=CC(=CC=C1COC(=O)/C=C/C2=CC(=C(C=C2)O)O)O[C@H]3[C@@H]([C@H]([C@@H]([C@H](O3)CO)O)O)O
C1=CC(=C(C=C1/C=C/C(=O)OC[C@@H]2[C@H]([C@@H]([C@H]([C@@H](O2)OC3=COC=CC3=O)O)O)O)O)O
C1=CC(=C(C=C1/C=C/C(=O)OCC(CO)O)O)O
C1=CC(=C(C=C1/C=C/C(=O)OCC[C@@H](C(=O)O)N)O)O
CC1CCC2C(C13CC(OC3=O)C4=CC(OC4=O)O)CC(=O)C=C2C
CC1CCC(=C(C1=O)CCC(=C)C)C(C)C
C[C@@H]1C[C@H]([C@]2([C@@H](O1)O[C@@H]3C[C@@H]4CC[C@@H]5[C@@H]([C@]4(C[C@H]3O2)C=O)CC[C@]6([C@@]5(CC[C@@H]6C7=CC(=O)OC7)O)C)O)O
CN1CCC2=CC(=C(C3=C2[C@H]1CC4=C(C(=C(C=C4)OC)OC5=CC=C(CC6=NCCC7=CC(=C(O3)C=C76)OC)C=C5)OC)OC)OC
CC(C)C1=CC[C@]([C@@H]2C1(CC(=C)CC2)O)(C)O
C[C@H]1CC[C@H](C2=C1C=CC(=C2)C)C(C)C
C[C@H]1CC[C@@H](C2=C1C=CC(=C2)C)C(C)C
CCCC1CC(=O)OC2=C1C3=C(C=CC(O3)(C)C)C(=C2C(=O)C(C)C(C)O)O
C[C@H]1CCC=C2[C@@]1(C3C(C3(C)C)CC2)C
C[C@@]1(CCC=C2C1([C@H]3[C@H](C3(C)C)CC2)C)O
C/C/1=C/[C@@H]2[C@@H]([C@@H](C[C@@]3(C(=O)C=C1O3)C)OC(=O)C(=C)C)C(=C)C(=O)O2
CC(=O)O[C@H]1C[C@@H]2C[C@]3([C@@H]1[C@@]4([C@H](C[C@@H](C([C@H]4[C@H]([C@@H]3OC(=O)C)OC(=O)C)(C)C)O)OC(=O)C)C)C(=O)C2=C
CC(=O)O[C@H]1C[C@@H]2C[C@]3([C@@H]1[C@@]4([C@H](C[C@@H](C([C@H]4C(=O)[C@@H]3OC(=O)C)(C)C)O)O)C)C(=O)C2=C
C/C=C/1\C2C3C4(N(C5=CC=CC=C5C46C(C2)[N+](C1)(CC6)C)C7C3N8C9(C7C1/C(=C\C)/C[N+]2(C(C9(C3=CC=CC=C83)CC2)C1)C)O)O
CC1(C=CC2=C(O1)C(=C(C3=C2OC4=C(C3=O)C=CC=C4O)O)OC)C
CC1=C(C=C(C=C1)O)CC[C@H]2C3CC[C@@H]([C@]3(CCC2=O)C)[C@H](C)CCCC(C)C
C[C@]12CCCC([C@@H]1CC(=O)C3=C2C(=O)C4C(C3)(O4)C(C)(C)O)(C)C
C[C@@H]1C2=C(CCN1)C3=CC=CC=C3N2
C1=CC(=CC=C1C2=C(C=C3C(=CC(=CC3=[O+]2)O)O)O[C@@H]4C(C([C@@H](C(O4)CO)O)O)O)O
C[C@]12CCC(=O)C([C@@H]1CC[C@]34[C@@H]2CC[C@@H](C3)[C@](C4)(CO)O)(C)C
CC(=O)OC[C@@]1(C[C@@]23CCC4[C@]([C@@H]2CC[C@H]1C3)(CCC(=O)C4(C)C)C)O
C1[C@@H]([C@H](OC2=C1C(=CC(=C2[C@@H]([C@@H]3[C@H]([C@@H](O[C@@H]3C4=C(C=C(C=C4)O)O)C5=CC=C(C=C5)O)C(=O)C6=C(C=C(C=C6)O)O)C7=CC=C(C=C7)O)O)O)C8=CC=C(C=C8)O)O
C1[C@H]([C@@H](OC2=CC(=C(C(=C21)O)C3=C(C=CC(=C3)O)C[C@H]4[C@H](O[C@H](C4C(=O)C5=C(C=C(C=C5)O)O)C6=CC=C(C=C6)O)C7=C(C=C(C=C7)O)O)O)C8=CC=C(C=C8)O)O
CC(=CCC1=C(C2=C(C=C1)C(=O)C3=C(O2)C=CC=C3O)O)C
C/C=C(\C)/C(=O)C1=C(C2=C(C3=C1OC(=O)C=C3C4=CC=CC=C4)OC(C=C2)(C)C)O
C[C@H]([C@H](C)O)C(=O)C1=C(C2=C(C3=C1OC(=O)CC3C4=CC=CC=C4)OC(C=C2)(C)C)O
C[C@@H]1[C@@H](OC2=C(C1=O)C(=C(C3=C2[C@@H](CC(=O)O3)C4=CC=CC=C4)CC=C(C)C)O)C
CC12CCC3C(C1(CCC2C4=CC(=O)OC4)O)CCC5C3(CC(C(C5)O)O)C=O
CN1CC[C@@]23[C@H]4NC5=CC=CC=C5[C@]2([C@@H]1NC6=CC=CC=C36)CCN4C
CO[C@H]1C[C@@H](OC2=C(C(=C3C(=C12)O[C@@]45[C@]3(C(=C(C(=O)C4=CC[C@@H](O5)C6=CC=CC=C6)OC)OC)OC)O)OC)C7=CC=CC=C7
COC1=C(C=C(C=C1)C2=COC3=C(C2=O)C=CC(=C3)O)O
C1C[C@]2([C@H]([C@@H]([C@@H]([C@@H]1N2)O)O)O)O
C1[C@@H]([C@@H]2[C@@H]([C@H]([C@H]([C@]1(N2)O)O)O)O)O
COC1=CC(=C(C(=C1C(=O)/C=C/C2=CC=C(C=C2)O)O)[C@H](C[C@H](CCC3=CC=C(C=C3)O)O)/C=C/C4=CC=C(C=C4)O)O
COC1=CC(=C(C(=C1C(=O)/C=C/C2=CC=C(C=C2)O)O)[C@@H](/C=C/CC(CCC3=CC=C(C=C3)O)O)C4=CC=C(C=C4)O)O
COC1=CC(=C(C2=C1C(=O)CC(O2)C3=CC=C(C=C3)O)C(CC(CCC4=CC=C(C=C4)O)O)C=CC5=CC=C(C=C5)O)O
COC1=CC(=C(C2=C1C(=O)CC(O2)C3=CC=C(C=C3)O)C4C[C@@H](O[C@H](C4)C5=CC=C(C=C5)O)CCC6=CC=C(C=C6)O)O
COC1=CC(=C2C3CC(OC(C3C(OC2=C1C(=O)C=CC4=CC=C(C=C4)O)C5=CC=C(C=C5)O)C6=CC=C(C=C6)O)CCC7=CC=C(C=C7)O)O
COC1=C2C(=O)CC(OC2=C3C4C[C@@H](O[C@@H](C4[C@@H](OC3=C1)C5=CC=C(C=C5)O)C6=CC=C(C=C6)O)CCC7=CC=C(C=C7)O)C8=CC=C(C=C8)O
COC1=CC(=C(C2=C1C(=O)CC(O2)C3=CC=C(C=C3)O)C4C[C@@H](O[C@@H](C4)C5=CC=C(C=C5)O)CCC6=CC=C(C=C6)O)O
COC1=CC(=C2C(CC(OC2=C1C(=O)C=CC3=CC=C(C=C3)O)C4=CC=C(C=C4)O)CC(CCC5=CC=C(C=C5)O)O)O
COC1=C2C(=O)CC(OC2=C3[C@@H](C[C@@H](OC3=C1)C4=CC=C(C=C4)O)C[C@H](CCC5=CC=C(C=C5)O)O)C6=CC=C(C=C6)O
CC1=COC2=CC(=CC(=C2C1=O)O)O[C@H]3[C@@H]([C@H]([C@@H]([C@H](O3)COC(=O)C4=CCC(CC4)C(C)(C)O)O)O)O
COC1=CC(=C2C(=C1)OC(=C(C2=O)OC)C3=CC=C(C=C3)O[C@H]4C(C([C@@H](C(O4)CO)O)O)O)O
CC(=CC[C@@H]1C[C@]23C[C@@H](C(OC2=C(C(=O)[C@@](C3=O)(C1(C)C)CC=C(C)C)C(=O)C4=CC(=C(C=C4)O)O)(C)C)CC=C(C)C)C
C[C@]12CC[C@@H](C(C1CC[C@@]3([C@@H]2CC=C4[C@]3(C[C@H]([C@@]5([C@@H]4CC(C[C@@H]5O)(C)C)CO)O)C)C)(C)C)O
C[C@]12CC[C@@H]([C@@]([C@@H]1CC[C@@]3([C@@H]2CC=C4[C@]3(C[C@H]([C@@]5([C@H]4CC(C[C@@H]5O)(C)C)CO)O)C)C)(C)C=O)O
C[C@]12CC[C@@H]([C@@]([C@@H]1CC[C@@]3([C@@H]2CC=C4[C@]3(C[C@H]([C@@]5([C@H]4CC(C[C@@H]5O)(C)C)CO)O)C)C)(C)CO)O
C[C@]12CC[C@@H]([C@@](C1CC[C@@]3(C2CC=C4C3(CC([C@@]5(C4CC([C@H](C5O)O)(C)C)CO)O)C)C)(C)C=O)O
C[C@H]1[C@@H]([C@H]([C@H]([C@@H](O1)O[C@@H]2[C@H](O[C@H]([C@@H]([C@H]2O)O)OC3=C4C(=CC(=C3)O)OC(=CC4=O)C5=CC=C(C=C5)O)COC(=O)C)O)O)O
CC(=O)O[C@@]12CC(CC[C@@H]1C(=O)C[C@@]3(C2=CC[C@H]4[C@]3(CC[C@@H]5[C@@]4(CC[C@@H](C5(C)C)O[C@H]6[C@@H]([C@H]([C@@H]([C@H](O6)C(=O)O)O[C@H]7[C@@H]([C@H]([C@H]([C@H](O7)CO)O)O)O[C@H]8[C@@H]([C@H]([C@@H]([C@H](O8)CO)O)O)O)O)O[C@H]9[C@@H]([C@H]([C@H]([C@H](O9)CO)O)O)O)C)C)C)(C)C
C[C@]12CC[C@@H](C([C@@H]1CC[C@@]3([C@@H]2CC=C4[C@]3(CC(=O)[C@@H]5[C@]4(CC(CC5)(C)C)O)C)C)(C)C)O[C@H]6[C@@H]([C@H]([C@@H]([C@H](O6)C(=O)O)O[C@H]7[C@@H]([C@H]([C@@H]([C@H](O7)CO)O)O)O[C@H]8[C@@H]([C@H]([C@@H]([C@H](O8)CO)O)O)O)O)O[C@H]9[C@@H]([C@H]([C@@H]([C@H](O9)CO)O)O)O
C[C@H]1[C@@H]([C@H]([C@H]([C@@H](O1)O[C@@H]2[C@H](O[C@H]([C@@H]([C@H]2O)O)OC3=C4C(=CC(=C3)O)OC(=CC4=O)C5=CC=C(C=C5)O)CO)O)O)O
C[C@H](CC[C@@H](C)C(C)C)[C@H]1CC[C@@H]2[C@@]1(CC[C@H]3[C@H]2CCC4[C@@]3(CC=C(C4)O)C)C
CC(C)C(C)CCC(C)C1CCC2C1(CCC3C2CC=C4C3(CCC(C4)O[C@H]5[C@@H]([C@H]([C@@H]([C@H](O5)CO)O)O)O)C)C
CCCCCCCCCCCCCCCC(=O)OC[C@@H]1[C@H]([C@@H]([C@H]([C@@H](O1)O[C@H]2CC[C@@]3(C4CC[C@@]5([C@H](CCC5C4CC=C3C2)C(C)CCC(C)C(C)C)C)C)O)O)O
CCCCCCCCCCCCCCCC(=O)O[C@H]1CC[C@@]2(C3CC[C@@]4([C@H](CCC4C3CC=C2C1)[C@H](C)CC[C@H](C)C(C)C)C)C
CC1([C@H]2CC[C@H](C2)C1=C)C
CC(=CCCC1(C2CCC1(C(C2)O)C)C)C
CC(=CCCC1(C2CCC1(C(=O)C2)C)C)C
CC1([C@H]2CCC1(C(=O)C2)C)C
C[C@H]1[C@@H]([C@H]([C@H]([C@@H](O1)O[C@@H]2[C@H]([C@@H](O[C@@H]([C@H]2OC(=O)/C=C/C3=CC(=C(C=C3)O)O)CO)OCC(C4=CC(=C(C=C4)O)O)OC)O)O)O)O
[2H]C1C2=CC3=CC=CC=C3N=C2C4=CC5=C(COC(=O)C5(CC)O)C(=O)N14
COC1=C(C=CC(=C1)/C=C/C(=O)NCCC2=CC=C(C=C2)O)O[C@@H](CO)[C@H](C3=CC(=C(C=C3)O)OC)O
CN1CCC2=CC3=C(C=C2C1CC4=C(C(=C(C=C4)OC)OC)C=O)OCO3
CC1=C2[C@H](/C(=C(/[C@H](C[C@@H](/C(=C/[C@@H]([C@@H](C2(C)C)C[C@@H]1OC(=O)C)OC(=O)C)/CO)O)OC(=O)C)\C)/OC(=O)C)OC(=O)C
COC1=C(C2=C(C[C@@H]3C4=CC5=C(C=C4CCN3C2)OCO5)C=C1)OC
C(CON)[C@H](C(=O)O)N
C[C@@H]1CC[C@H](CC2=C1C=CC(=N2)C)C(C)(C)O
C=C1CC23CC1(CCC2C45CCCC(C4[C@@H]3C(=O)O)(C(=O)O5)C(=O)O)O
C=C1CC23CC1(CCC2C45CC=CC(C4[C@@H]3C(=O)O)(C(=O)O5)CO)O
C(CO[NH+]=C(N)N)C(C(=O)[O-])[NH3+]
C[C@H]1/C=C/C=C/C=C/C=C/C=C/C=C/C=C/[C@@H](C[C@H]2[C@@H]([C@H](C[C@](O2)(C[C@H]([C@@H](CCC(=O)C[C@H](C[C@H](CC(=O)O[C@H]([C@@H]([C@@H]1O)C)C)O)O)O)O)O)O)C(=O)O)O[C@H]3[C@H]([C@H]([C@@H]([C@H](O3)C)O)N)O
CC(=CCC1=C(C=C(C2=C1OC(CC2=O)C3=CC=CC=C3)OC)OC)C
C[C@@]12C[C@H](C3(CCC(CC3C1=CCC4C2(CCC5C4(CCC([C@@]5(C)CO[C@@H]6[C@@H]([C@@H]([C@H](O6)CO)O)O)O[C@H]7[C@@H]([C@H]([C@@H]([C@H](O7)CO)O)O)O)C)C)(C)C)C=O)O
CCC(C)C(=O)OC[C@@]1([C@@H]2[C@]1(C[C@H]([C@]3([C@H]2C=C(C[C@]4([C@H]3C=C(C4=O)C)O)COC(=O)C)O)C)OC(=O)CC5=CC=CC=C5)C
CC1=C(C(=O)CC2[C@@]1(CCC3[C@]2(CC[C@@]4([C@@]3(CC[C@@]5([C@H]4C[C@](CC5)(C)C(=O)O)C)C)C)C)C=O)O
C[C@]1(CC[C@@H]2[C@@H]([C@@H]3[C@@]14[C@@H](O4)[C@@H]5[C@]3(O5)C)OC(=O)C2=C)O
CCCCCC1=CC2=C(C=CC(O2)(C)CCC=C(C)C)C(=C1)O
CCCCCC1=CC(=C(C(=C1)O)C2C=C(CC[C@@H]2C(=C)C)C)O
CCCCCC1=CC(=C(C(=C1)O)C/C=C(\C)/CCC=C(C)C)O
CCCCCC1=CC2=C(C(=C1)O)C3=C(C=CC(=C3)C)C(O2)(C)C
CCCCCC1=CC2=C(C3=C(C=CC(=C3)C)C(O2)(C)C)C(=C1C(=O)O)O
C1=C(C=C(C(=C1O)O)O[C@@H]2[C@H]([C@@H]([C@H]([C@@H](O2)CO)O)O)O)C3=C(C(=O)C4=C(C=C(C=C4O3)O)O)O
COC1=C(C=CC(=C1)C2C(C(=CC3=CC(=C(C=C23)O)OC)C(=O)NCCC4=CC=C(C=C4)O)C(=O)NCCC5=CC=C(C=C5)O)O
COC1=C(C=CC(=C1)C=C(C(=CC2=CC(=C(C=C2)O)OC)C(=O)NCCC3=CC=C(C=C3)O)C(=O)NCCC4=CC=C(C=C4)O)O
CC1CCC2(C(C3C(O2)CC4C3(CCC5C4CCC6C5(CCC(C6)OC7C(C(C(C(O7)CO)OC8C(C(C(CO8)O)O)O)O)OC9C(C(C(C(C9OC2C(C(C(C(O2)CO)O)O)O)O)O)O)O)C)C)C)OC1
C[C@]12[C@@H]3CC[C@@H]([C@]1(C(=O)OC2=O)C)O3
CC1=CC(C(CC1=O)(C)C)/C=C/C(=C\C=C/C(=C/C=C/C=C(\C)/C=C\C=C(\C)/C=C/C2=C(C(=O)CCC2(C)C)C)/C)/C
C1=CC=C2C(=C1)C3=C4N2C(=O)C=CC4=NC=C3
COC(=O)C1=CC=CC=C1O[C@H]2[C@@H]([C@H]([C@@H]([C@H](O2)CO[C@H]3[C@@H](C(CO3)(CO)O)O)O)O)O
COC1=CC(=CC(=C1O)OC)O[C@H]2[C@@H]([C@H]([C@@H]([C@H](O2)CO[C@H]3[C@@H](C(CO3)(CO)O)O)O)O)O
COC1=C(C=CC(=C1)O[C@H]2[C@@H]([C@H]([C@@H]([C@H](O2)CO[C@H]3[C@@H]([C@](CO3)(CO)O)O)O)O)O)O
COC1=C(C=CC(=C1)O)O[C@H]2[C@@H]([C@H]([C@@H]([C@H](O2)CO[C@H]3[C@@H](C(CO3)(CO)O)O)O)O)O
C[C@H]1[C@H](CC2=C1C=NC=C2C(=O)OC)O
COC1=C(C2=C(CC3C4=C(C(=C(C=C4CCN3C2)OC)OC)O)C=C1)OC
COC1=C(C(=C2C3CC4=C(CN3CCC2=C1)C(=C(C=C4)O)OC)O)OC
CC(CC#CCC1=CC=CC=C1)O
CC#CCC1=CC2=CC=CC=C2C(=O)O1
COC1=C(C=C2C(=C1O)C(=O)C=C(O2)OC3=CC=C(C=C3)O)O
CC(=CCC1=C(C(=CC(=C1)/C=C/C(=O)O)C/C=C(\C)/CO)O)C
CC(=CCC1=C(C(=CC(=C1)/C=C/C(=O)O)C/C=C(/C)\CO)O)C
C/C=C/C=C/CC1=CC=CC=C1
CC#CC#CC(=O)C1=CC=CC=C1
CC1CC(=O)C(C1O)O
CCCCCC1=C(C(=CC(=C1O[C@H]2[C@@H]([C@H]([C@@H]([C@H](O2)CO)O)O)O)O)O)O[C@H]3[C@@H]([C@H]([C@@H]([C@H](O3)CO)O)O)O
CC1[C@@H](C([C@@H]([C@@H](O1)OC2[C@H]([C@H](C(O[C@H]2OC3=C(OC4=CC(=CC(=C4C3=O)O)O)C5=CC(=C(C=C5)O)O)CO[C@H]6[C@H](C([C@H](C(O6)C)OC(=O)/C=C/C7=CC=C(C=C7)O)O[C@H]8C([C@H]([C@@H](C(O8)CO)O)O)O)O)O)O)O)O)O
CCC1CC(OC(=O)C1C)C(C)([C@H]2CCC3([C@@]2(CCC4C3=CC(=O)[C@H]5[C@@]4(C[C@@H]([C@@H](C5)O)O)C)C)O)O
C1=CC2=C(C(=C1)O[C@H]3[C@@H]([C@H]([C@@H]([C@H](O3)CO)O)O)O)C(=CN2)CC#N
C1=CC2=C(C(=C1)O[C@H]3[C@@H]([C@H]([C@@H]([C@H](O3)CO[C@H]4[C@@H]([C@H]([C@@H]([C@H](O4)CO)O)O)O)O)O)O)C(=CN2)CC#N
CC(C)/C=C/CCCCC(=O)NCC1=CC(=C(C=C1)O)OC
CC1=C(C(C[C@@H](C1)O)(C)C)/C=C/C(=C/C=C/C(=C/C=C/C=C(\C)/C=C/C=C(\C)/C=C/C(=O)[C@]2(C[C@@H](CC2(C)C)O)C)/C)/C
C[C@H]1CC[C@@H](NC1)[C@@H](C)[C@H]2[C@@H](C[C@@H]3[C@@]2(CC[C@H]4[C@H]3CC=C5[C@@]4(CC[C@@H](C5)O[C@H]6[C@@H]([C@H]([C@@H]([C@H](O6)CO)O)O)O)C)C)O
C[C@@H]1CCC2(C(C3C(O2)CC4[C@@]3(CCC5C4CC[C@@H]6[C@@]5(C[C@H](C(C6)O[C@H]7[C@@H]([C@H]([C@@H]([C@H](O7)CO)O)O[C@H]8[C@@H]([C@H]([C@@H]([C@H](O8)CO)O[C@H]9[C@@H]([C@H]([C@@H]([C@H](O9)CO)O)O[C@H]2[C@@H]([C@H]([C@@H]([C@H](O2)CO)O)O)O)O[C@H]2[C@@H]([C@H]([C@@H]([C@H](O2)CO)O)O)O)O)O)O)O)C)C)C)OC1
CC1C(CC(C2=CCC(CC12C)C(=C)C)O)O
C/C(=C\C=C\C=C(\C=C\C=C(\C=C\C(=O)C1(C(CC(C1)O)(C)C)C)/C)/C)/C=C/C=C(/C=C/C(=O)C2(C(CC(C2)O)(C)C)C)\C
CC(=O)CC[C@H]1[C@]2([C@@]1(C[C@@H]3[C@H](C2)C(=C)C(=O)O3)C)C
C1CN2CC3=CCOC4C5C3CC2C16C5N(C7C8C9CC1C2(C8N4C3=CC=CC=C32)CCN1CC9=CCO7)C1=CC=CC=C61
CC1CC[C@@H]2[C@H]([C@@H]1O)C2(C)C
C1CN2CC3=CC4=C(C=C3[C@H]5C2C1=CC[C@H]5O)OCO4
COC(=O)C1=CC(=O)NC2=C1C=C(C=C2)O
COC1=CC2=C(C=C1)C(=O)C3=C(O2)C=CC(=C3)C(=O)OC
C(CSCC(C(=O)O)N)C(=O)O
C1=CC(=C(C=C1O[C@H]2[C@@H]([C@H]([C@@H]([C@H](O2)CO)O)O)O)C(=O)O)O
COC1=CC(=CC(=C1C(=O)/C=C/C2=CC=CC=C2)O)O
C=CC/C=C\C/C=C\CCCCCCCC1=CC(=CC=C1)O
C1[C@H]([C@H](OC1=O)[C@H]([C@@H]([C@@H](C2=CC=CC=C2)O)O)O)O
C=C(CO)[C@@H](C#N)O[C@H]1[C@@H]([C@H]([C@H]([C@H](O1)CO)O)O)O
C1C[C@H]2C=C3[C@@H]4[C@@H]([C@H]2NC1)C5=CC6=C(C=C5CN4CC3O)OCO6
CO[C@H]1C=C2CCN3[C@H]2[C@@H]([C@@H]1O)C4=CC(=C(C=C4C3)OC)O
C1[C@@H]([C@@H](C([C@@H](O1)C2=C(C(=C(C3=C2OC(=CC3=O)C4=CC(=C(C=C4)O)O)O)[C@H]5C([C@H]([C@@H](C(O5)CO)O)O)O)O)O)O)O
CCN1C[C@@]2(CC[C@@H]([C@@]34[C@@H]2C[C@@H](C31)[C@]5(C[C@@H]([C@H]6C[C@@H]4[C@@H]5[C@H]6O)OC)O)O)C
C[C@H](CC/C=C(\C)/CO[C@H]1[C@@H]([C@H]([C@@H]([C@H](O1)CO[C@H]2[C@@H]([C@H]([C@@H]([C@H](O2)CO)O)O)O)O)O)O)[C@H]3CC[C@@]4([C@@]3(CC(=O)[C@@]5([C@H]4CC=C6[C@H]5CC[C@@H](C6(C)C)O)C)C)C
C[C@H](CC/C=C(\C)/CO[C@H]1[C@@H]([C@H]([C@@H]([C@H](O1)CO[C@H]2[C@@H]([C@H]([C@@H]([C@H](O2)CO)O)O)O)O)O)O)[C@H]3CC[C@@]4([C@@]3(CC(=O)[C@@]5([C@H]4CC=C6[C@H]5CC[C@H](C6(C)C)O[C@H]7[C@@H]([C@H]([C@@H]([C@H](O7)CO)O)O)O)C)C)C
C[C@H](CC/C=C(\C)/CO[C@H]1[C@@H]([C@H]([C@@H]([C@H](O1)CO[C@H]2[C@@H]([C@H]([C@@H]([C@H](O2)CO)O)O)O)O)O)O)[C@H]3CC[C@@]4([C@@]3(C[C@H]([C@@]5([C@H]4CC=C6[C@H]5CC[C@H](C6(C)C)O[C@H]7[C@@H]([C@H]([C@@H]([C@H](O7)CO)O)O)O)C)O)C)C
C1=C(NC=N1)C[C@@H](C(=O)[O-])NC(=O)CC[NH3+]
CC(C)C1=C(C(=C2C(=C1)[C@@H]3CC4[C@@]2(CCCC4(C)C)C(=O)O3)O)O
CC1=CC2C(CCC3N2C(C1)CC4N3C(=O)CCC4)O
CC1=CC[C@@]2(CC[C@H]([C@@]2(CC1)O)C(C)C)C
CC1(C=CC2=C(O1)C=C3C(=C2O)C(=O)C=C(O3)C4=CC=C(C=C4)O)C
C[C@H]1[C@@H]2CC[C@H](N1)CCCCCCCC(=O)O[C@H]3CC[C@@H](CCCCCCCC(=O)O2)N[C@H]3C
C[C@H]1CC[C@H]2[C@H](C(=O)O[C@@H]2[C@@H]3[C@H]1C(=O)C=C3C)C
CC[C@H](C[C@H]([C@@H](C)[C@H]1CC[C@@H]2[C@@]1(CC[C@H]3C2=CC(=O)[C@@H]4[C@@]3(CC[C@@H]([C@H]4C)OC(=O)C5=CC=CC=C5)C)C)O)C(C)C
COC1=C2C(=CC(=C1)O)OC(C2=O)(CC3=CC=C(C=C3)O)O
C1C(OC2=CC(=C(C(=C2C1=O)O)O)O)C3=CC=C(C=C3)O
C1=CC(=CC=C1/C=C/C(=O)C2=C(/C(=C/C3=C(/C(=C(\C=C\C4=CC=C(C=C4)O)/O)/C(=O)C(C3=O)(C5[C@@H]([C@H]([C@@H]([C@H](O5)CO)O)O)O)O)O)/C(=O)C(C2=O)(C6[C@@H]([C@H]([C@@H]([C@H](O6)CO)O)O)O)O)O)O
C1=CC(=CC=C1/C=C/C(=O)C2=C(C(=O)C(=O)C=C2O)OC3C(C(C(C(O3)CO)O)O)O)O
COC1=CC(=CC(=C1OC)OC)C2C3COC(=O)C3CO2
CC1=C(C=C(C=C1)C(C)C)O
CC1=C(C=C(C=C1)C(C)C)OC(=O)C
CC1=CC[C@H](C[C@H]1O)C(=C)C
C[C@H]1CC[C@@H](C[C@@H]1O)C(C)C
CC1=CC[C@@H](CC1=O)C(=C)C
CC1(C[C@H]2[C@H]1CCC3(C(O3)CCC2=C)C)C
C[C@@H]1C[C@@H]([C@@]2([C@@H]([C@@]1(C)[C@@H]3C[C@H]4C=CO[C@H]4O3)CC[C@H]([C@]25CO5)OC(=O)C)COC(=O)C)OC(=O)C
C[C@@]1([C@H](CC2[C@@H]1[C@@H](OC=C2C(=O)OC)O[C@H]3[C@@H]([C@H]([C@@H]([C@H](O3)CO)O)O)O)O)O
C[C@@H]1[C@@H](C[C@@]2([C@@H]([C@]1(C[C@H](C3=COC=C3)O)C=O)CC[C@H]([C@]2(C)O)O)C)OC(=O)C
C[C@@H]1[C@@H](C[C@@]2([C@@H]([C@]1(CC(=O)C3=COC=C3)C=O)CC[C@@H]4[C@]2(O4)C)C)OC(=O)C
C1=CC2=C(C(=C1)O[C@H]3[C@@H]([C@H]([C@@H]([C@H](O3)CO)O)O)O)C(=O)C4=C(C=C(C=C4[C@H]2[C@H]5[C@@H]([C@H]([C@@H]([C@H](O5)CO)O)O)O)CO)O
CC1=CC(=C2C(=C1)[C@H](C3=C(C2=O)C(=CC=C3)O[C@H]4[C@@H]([C@H]([C@@H]([C@H](O4)CO)O)O)O)[C@H]5[C@@H]([C@H]([C@@H]([C@H](O5)CO)O)O)O)O
CC1=CC(=C2C(=C1)[C@@H](C3=C(C2=O)C(=CC=C3)O[C@H]4[C@@H]([C@H]([C@@H]([C@H](O4)CO)O)O)O)[C@H]5[C@@H]([C@H]([C@@H]([C@H](O5)CO)O)O)O)O
CCCC(=O)O[C@H]1C2=C[C@H](C[C@H]3[C@@]2([C@@H](C[C@@H]([C@]3(C)CCC(=C)C=C)C)O)[C@H](O1)OC(=O)C)OC(=O)C(C)CC
CCC(C)C(=O)O[C@H]1C[C@@H]2[C@@]([C@H](C[C@H]([C@@]23[C@H](O[C@H](C3=C1)OC)OC(=O)C)O)C)(C)CCC(=C)C=C
CCCC(=O)O[C@H]1C2=C[C@H](C[C@H]3[C@@]2([C@@H]([C@@H]([C@@H]([C@]3(C)CCC(=C)C=C)C)O)O)[C@H](O1)OC(=O)C)OC(=O)C(C)CC
CCCC(=O)O[C@H]1C2=C[C@H](C[C@H]3[C@@]2([C@@H]([C@@H]([C@@H]([C@]3(C)CCC(=C)C=C)C)OC(=O)C)O)[C@H](O1)OC(=O)C)OC(=O)C(C)CC
CCC(C)C(=O)O[C@@H]1C[C@@H]2[C@@]([C@H](C[C@H]([C@@]23[C@H](O[C@H](C3=C1)OC(=O)C)OC(=O)C)O)C)(C)CCC(=C)C=C
CCC(C)C(=O)O[C@H]1C[C@@H]2[C@@]([C@H](C[C@H]([C@@]2(C(=C1)C=O)C=O)O)C)(C)CCC(=C)C=C
C/C=C(\C)/C(=O)O[C@H]1C[C@@H]2[C@@H](OC([C@]23[C@H](C1)[C@@]([C@H](C[C@H]3O)C)(C)C/C=C(\C)/C=C)OC(=O)C)OC(=O)C
CCC(C)C(=O)O[C@H]1C[C@@H]2[C@@H](OC([C@]23[C@H](C1)[C@@]([C@H](C[C@H]3O)C)(C)C/C=C(\C)/C=C)OC(=O)C)OC(=O)C
C[C@H]1CC(=O)[C@]23[C@H](C[C@@H](C[C@@H]2[C@@]1(C)C/C=C(\C)/C=C)OC(=O)C)[C@@H](O[C@@H]3OC(=O)C)OC(=O)C
C[C@H]1CC(=O)[C@]23[C@H](C[C@@H](C[C@@H]2[C@@]1(C)C/C=C(/C)\C=C)OC(=O)C)[C@@H](O[C@@H]3OC(=O)C)OC(=O)C
CCC(C)C(=O)O[C@H]1C[C@@H]2[C@@]([C@H](C[C@H]([C@@]23[C@H](O[C@H](C3=C1)OC(=O)C)OC(=O)C)O)C)(C)C/C=C(\C)/C=C
CN(CCC1=CN(C=N1)C2C(C(C(C(O2)CO)O)O)O)C(=O)/C=C/C3=CC=CC=C3
C[C@@H]\1[C@H]2[C@H](CC/C1=C\C(=O)OCCN(C)C)[C@]3(CC[C@@H](C([C@@H]3C[C@@H]2O)(C)C)O)C
C[C@@H]\1[C@H]2[C@H](CC/C1=C\C(=O)OCCN(C)C)[C@]3(CC[C@@H](C([C@@H]3CC2=O)(C)C)O)C.OS(=O)(=O)O
CC1=CC(=C2C(=C1)C(C3=C(C2=O)C(=CC=C3)O)(C4C(C(C(C(O4)CO)O)O)O)O)O
CC1[C@@H](C([C@@H]([C@@H](O1)OC2[C@@H](OC([C@H](C2=O)O)C)C3=C(C=C4C(=C3O)C(=O)C=C(O4)C5=CC=C(C=C5)O)O)O)O)O
CC1[C@@H](C([C@@H]([C@@H](O1)OC2[C@@H](OC([C@H](C2=O)O)C)C3=C(C=C4C(=C3O)C(=O)C=C(O4)C5=CC(=C(C=C5)O)O)O)O)O)O
CC1[C@@H](C([C@@H]([C@@H](O1)OC2[C@@H](OC([C@H](C2=O)O)C)C3=C(C=C4C(=C3O)C(=O)C=C(O4)C5=CC(=C(C=C5)OC)O)O)O)O)O
CC1=CC(=O)C2=C(O1)C=C3C=CC=C(C3=C2O)O[C@H]4[C@@H]([C@H]([C@@H]([C@H](O4)CO)O)O)O
C1C(C2=CC(=C(C=C2C(C3=C(C=C(C=C31)O)O)CC4=CC(=CC(=C4)O)O)O)O)C5=CC(=C(C=C5)O)O
C1=CC2=C(C=C1C=CC3=CC(=CC(=C3)O)O)OC(C(O2)C4=CC(=CC(=C4)O)O)C5=CC(=C(C=C5)O)O
COC1=C(C=C2CC3C4=C(C2=C1)C5=C(C(=C4CCN3)OC)OCO5)O
CN1CCC2=CC3=C(C4=C2[C@@H]1CC5=CC(=C(C=C54)OC)O)OCO3
COC1=C2CCNC3C2=C(C4=CC5=C(C=C4C3)OCO5)C6=C1OCO6
C1[C@@H]2[C@H]([C@H]3[C@@H]4[C@@H](C5=C(C(=C(C(=C5C(=O)O4)C6=C(C(=C(C(=C6C(=O)O3)C7=C(C(=C(C=C7C(=O)O2)O)O)O)O)O)O)O)O)O)O)OC(=O)C8=CC(=C(C(=C8C9=C(C(=C(C=C9C(=O)O1)O)O)O)O)O)O
COC1=C(C=C(C=C1)C2=C(C(=O)C3=C(C(=C(C=C3O2)OC)OC)O)OC)O
C1[C@@H]2[C@@H]([C@H]3[C@H]([C@@H](O2)OC(=O)C4=CC(=C(C(=C4)O)O)O)OC(=O)C5=CC(=C(C(=C5C6=C(C(=C(C=C6C(=O)O3)O)O)O)O)O)O)OC(=O)C7=CC(=C(C(=C7C8=C(C(=C(C=C8C(=O)O1)O)O)O)O)O)O
C1[C@H]([C@@H](OC(=O)C2=CC(=C(C(=C2C3=C(C(=C(C=C3C(=O)O1)O)O)O)O)O)O)[C@H]4[C@@H]5[C@@H](C6=C(C(=C(C(=C6C(=O)O5)C7=C(C(=C(C=C7C(=O)O4)O)O)O)O)O)O)O)O
C1[C@H]([C@@H](OC(=O)C2=CC(=C(C(=C2C3=C(C(=C(C=C3C(=O)O1)O)O)O)O)O)O)[C@H]4[C@@H]5[C@@H](C6=C(C(=C(C(=C6C(=O)O5)C7=C(C(=C(C=C7C(=O)O4)O)O)O)O)O)O)O)OC(=O)C8=CC(=C(C(=C8)O)O)O
CC1(CC=C(C(=O)O1)C2C3=CC=CC=C3C(=O)O2)C
C1=CO[C@@H]([C@@H]2[C@H]1[C@H]([C@@H]3[C@]2(O3)CO)O)O[C@@H]4[C@H]([C@@H]([C@H]([C@@H](O4)CO)O)O)O
C1=COC([C@H]2[C@@H]1[C@@H]([C@H]3[C@@]2(O3)CO)OC(=O)C4=CC=C(C=C4)O)O[C@H]5[C@@H]([C@H]([C@@H]([C@H](O5)CO)O)O)O
C[C@H]1CC2=C(C=C(C=C2O[C@@H]1C3=CC(=C(C=C3)O)O)O)O
C1[C@H]([C@H](OC2=CC(=CC(=C21)O[C@H]3[C@@H]([C@H]([C@@H]([C@H](O3)CO)O)O)O)O)C4=CC(=C(C=C4)O)O)O
[14CH]1=[14CH][14CH]=[14C]([14C](=[14CH]1)O)O
CC1=CC(=C2C(=C1O)C(=O)C3=CC(=CC(=C3C2=O)O)O)O
CCC12CC3CN4C3(C1)C(O2)[C@@](C5=C(CC4)C6=CC=CC=C6N5)(C7=C(C=C8C(=C7)C91CCN2C9C(C=CC2)([C@H]([C@@](C1N8C)(C(=O)OC)O)OC(=O)C)CC)OC)C(=O)OC
CCC1=CC2C[C@]3([C@@H]1N(C2)CCC4=C3NC5=CC=CC=C45)C(=O)OC.OS(=O)(=O)O
CC/C/1=C/N(CCC2=C([C@](CC(=O)C1)(C3=C(C=C4C(=C3)C56CCN7[C@H]5[C@@](C=CC7)([C@H]([C@@]([C@@H]6N4C)(C(=O)OC)O)OC(=O)C)CC)OC)C(=O)OC)NC8=CC=CC=C28)C=O
CCC12C=CCN3C1C4(CC3)C(C(C2O)(C(=O)OC)O)N(C5=CC=CC=C45)C
CC1=C[C@H]([C@@H]([C@H](C1)C2=C(C=C(C=C2)O)O)C(=O)C3=C(C=C(C=C3)O)O)C4=C(C=C(C5=C4O[C@]6(C7=C(C=C(C=C7)O)O[C@]6(C5=O)O)CC=C(C)C)O)O
C[C@@H]1C[C@@H]([C@@H]([C@@]2([C@]13C[C@@H]([C@H]([C@@H]2OC(=O)C4=CC=CC=C4)OC(=O)C5=CN=CC=C5)C(O3)(C)C)COC(=O)C6=CN=CC=C6)OC(=O)C)OC(=O)C
C[C@H](C(=O)C1=CC=CC=C1)N
C[C@H]1COC2(CC3CC4C5CC=C6CC(CC(C6(C5CCC4(C3C2C)C)C)O[C@H]7[C@@H]([C@H]([C@@H](CO7)O)O[C@H]8[C@@H]([C@H]([C@@H](CO8)O)O)O)O[C@H]9[C@@H]([C@@H]([C@@H]([C@@H](O9)C)O)O)O)O)[C@@H]([C@@H]1O)O
CC(C)/C(=C/C(=O)O[C@@H]1CC2C3CC[C@@H](CC3=CC[C@]2([C@@]4([C@]1([C@@](CC4)(C(=O)C)O)C)O)O)O)/C
CC1C(C(CC(O1)OC2CCC3(C(C2)CCC4C3C(=O)C(C5(C4(CCC5C6=CC(=O)OC6)O)C)O)C)OC)O
COC(=O)C1=CC2=C(C(=CC3=C1NC4=CC=CC=C43)C(=O)OC)NC5=CC=CC=C52
COC1=CC=CC(=C1)C2=CC(=O)C3=C(O2)C4=C(C=C3)OC=C4
CC1=C[C@H]([C@@](CC1)(C)/C=C/C2=CC3=C(C=C2)NC=C3)C4=CC5=C(C=C4)NC=C5
C[C@]12CC[C@@H]([C@@]([C@@H]1CC[C@@]3([C@@H]2CC=C4[C@]3(CC[C@@]5([C@H]4CC(CC5)(C)C)C(=O)O)C)C)(C)CO)O[C@H]6[C@@H]([C@H]([C@H](CO6)O)O)O
C[C@]12CC[C@@H]([C@@](C1CC[C@@]3([C@@H]2CC=C4[C@]3(C[C@H]([C@@]5([C@H]4CC(CC5)(C)C)C(=O)O)O)C)C)(C)CO)O[C@H]6[C@@H]([C@H]([C@H](CO6)O)O)O
C[C@]12CC[C@@H]([C@@]([C@@H]1CC[C@@]3([C@@H]2CC=C4[C@]3(CC[C@@]5([C@H]4CC(CC5)(C)C)C(=O)O)C)C)(C)CO)O[C@H]6[C@@H]([C@H]([C@H](CO6)O)O)O[C@H]7[C@@H]([C@H]([C@@H]([C@H](O7)CO)O)O)O
C[C@H]1[C@@H]([C@H]([C@H]([C@@H](O1)O[C@@H]2[C@H](O[C@H]([C@@H]([C@H]2O)O)OC[C@@H]3[C@H]([C@@H]([C@H]([C@@H](O3)OC(=O)[C@]45CCC(CC4C6=CCC7[C@]8(CC[C@@H]([C@@](C8CC[C@]7(C6(CC5)C)C)(C)CO)O[C@H]9[C@@H]([C@H]([C@H](CO9)O)O)O)C)(C)C)O)O)O)CO)O)O)O
C1=CC(=CC=C1/C=C/C(=O)O[C@H]2[C@@H]([C@H](O[C@H]([C@@H]2O)O[C@@H]3[C@H]([C@@H]([C@H](O[C@H]3OC4=C([O+]=C5C=C(C=C(C5=C4)O[C@H]6[C@@H]([C@H]([C@@H]([C@H](O6)CO)O)O)O)O)C7=CC(=C(C(=C7)O)O)O)CO)O)O)CO)O)O.[Cl-]
COC1=C(C=C(C(=C1)O)C(=C)C2=CC=CC=C2)O
CC1(C=CC2=C3C=CC(=O)OC3=CC(=C2O1)O)C
CC1=CC(=O)[C@H]([C@]2([C@H]1C[C@H]([C@]34[C@@H]2[C@H]([C@H]5[C@@]([C@@H]3C(=O)O5)(OC4)C)O)O)C)O
C1CCN(CCCNC(=O)CC(NC1)C2=CC=CC=C2)C(=O)C3=CC=CC=C3
C1CCN(CCCNC(=O)C[C@H](NC1)C2=CC=CC=C2)C(=O)/C=C/C3=CC=CC=C3
C1CCN(CCCNC(=O)CC(NC1)C2=CC=CC=C2)C(=O)C3=COC=C3
CC1CC(C(C2(C13C(C(CC2OC(=O)C4=CC=CC=C4)C(O3)(C)C)OC(=O)C)COC(=O)C)O)OC(=O)C
CC1CC[C@@H]([C@@]2([C@]13C([C@@H]([C@H]([C@@H]2OC(=O)C4=CN=CC=C4)OC(=O)C)C(O3)(C)C)OC(=O)C5=COC=C5)C)OC(=O)C
C[C@]12CCCC(C1=C(C(=O)C3=CC(=C(C=C23)O)O)O)(C)C
C[C@@H]1C[C@@H]([C@@H]([C@@]2(C13CC(CC2OC(=O)/C=C/C4=CC=CC=C4)C(O3)(C)C)C)OC(=O)C)OC(=O)/C=C/C5=CC=CC=C5
C[C@]12CC[C@@](C[C@H]1[C@@]3(CC[C@@]4(C(=CC=C5C4=CC(=O)C(=C5)O)[C@]3(CC2)C)C)C)(C)C(=O)O
CC(C)(C1CC2=C(O1)C=C3C(=C2O)C=CC(=O)O3)O
CC(C)(C=C)C1=CC(=C(C2=C1C=CC(=O)O2)O)OC
C[C@]12CC[C@H]([C@]3([C@H]1C[C@@H](CC3)C(C)(C)O[C@H]4[C@@H]([C@H]([C@@H]([C@H](O4)CO)O)O)O)CO2)O
C([C@@H]1[C@H]([C@H]([C@H]([C@@H](O1)O)O)O)O[C@H]2[C@@H]([C@H]([C@@H]([C@H](O2)O)O)O)O)O
CC(C)[C@H]1C(=O)N[C@H](C(=O)N[C@H](C(=O)N[C@@H](CC2=CN([C@H](C(=O)N1)NC(=O)[C@H](CC3=CC=C(C=C3)O)NC(=O)[C@@H]4CCCN4C(=O)[C@@H]5CCC(=O)N5)C6=CC=CC=C26)C(=O)N[C@@H](CCCCN)C(=O)O)CO)CC7=CC=CC=C7
C/C/1=C\CC/C(=C/C/C=C(\C=C\[C@@H](CC1)C(C)C)/C)/C
C1=CC(=C(C=C1C2=C(C(=O)C3=C(C=C(C=C3O2)O)O)O[C@H]4[C@@H]([C@H]([C@@H]([C@H](O4)CO)O)O)O)OS(=O)(=O)[O-])O
COC1=C(C=C(C=C1)C2=C(C(=O)C3=C(C(=C(C=C3O2)O)OC)O)OC)OC
COC1=C(C=C(C=C1)C2=C(C(=O)C3=C(C(=C(C=C3O2)O[C@H]4C([C@H]([C@@H](C(O4)CO)O)O)O)OC)O)OC)O
C[C@@](CCl)(C(=O)O[C@H]1CC(=C)[C@@H]2C[C@@H]([C@@]([C@@H]2[C@@H]3[C@@H]1C(=C)C(=O)O3)(CCl)O)O)O
COC1=CC2=C(C=C1)NC=C2CCNC(=O)/C=C\C3=CC=C(C=C3)O
CC[C@H]1CN2CCC3=CC(=C(C=C3[C@@H]2C[C@@H]1C[C@@H]4C5=CC(=C(C=C5CCN4)O)OC)OC)OC
COC1CC23C(=CC1O)C(CN2CCCC4=CC(=C(C=C34)OC)OC)O
C/C=C(\C)/C(=O)NC(C1=CC=CC=C1)C(C(=O)O[C@H]2C[C@]3([C@H]([C@H]4[C@@]([C@H](C[C@@H]5[C@]4(CO5)OC(=O)C)O)(C(=O)[C@@H](C(=C2C)C3(C)C)OC(=O)C)C)OC(=O)C6=CC=CC=C6)O)O
COC1=C[C@]23CCC(=O)N2CCC4=CC5=C(C=C4[C@@H]3[C@@H]1O)OCO5
COC1=C[C@@]23CCCN2CCC4=CC5=C(C=C4[C@H]3C1O)OCO5
COC1=C[C@]23CCCN2CCC4=CC5=C(C=C4[C@@H]3C1=O)OCO5
CN1C2=CC3=CC=CC=C3C4=C2C(=CC5=C4OCO5)C(=O)C1=O
CN1C2=CC3=CC=CC=C3C4=C2C(=CC(=C4OC)OC)C(=O)C1=O
CN1CC[C@@]23[C@@]1(CCC4=C2C(=C(C=C4)OC)O)C=C(C(=O)C3)OC
CN1CCC2=CC3=C(C4=C2C1CC5=CC=C(C=C5)OC6=C(C=CC(=C6)CC7C8=CC(=C(C=C8CCN7C)OC)O4)O)OCO3
CN1CCC2=CC3=C(C4=C2C1CC5=CC=C(C=C5)OC6=C(C=CC(=C6)CC7C8=CC(=C(C=C8CCN7C)OC)O4)OC)OCO3
C[C@H]1[C@@H]([C@H]([C@@H]([C@@H](O1)O[C@H]2CC[C@]3([C@@H](C2)CC[C@@H]4[C@@H]3CC[C@]5([C@@]4(CC[C@@H]5C6=CC(=O)OC6)O)C)C)OC(=O)C)OC)O
C[C@H]1[C@@H]([C@H]([C@@H]([C@@H](O1)O[C@H]2CC[C@]3([C@@H](C2)CC[C@@H]4[C@@H]3CC[C@]5([C@@]4(CC[C@@H]5C6=CC(=O)OC6)O)C)C)O[C@H]7[C@@H]([C@H]([C@@H]([C@H](O7)CO[C@H]8[C@@H]([C@H]([C@@H]([C@H](O8)CO)O)O)O)O)O)O)OC)O
CCCCCCCCCCCCCCCCCC[C@H](C(=O)N[C@@H](CO[C@H]1[C@@H]([C@H]([C@@H]([C@H](O1)CO)O)O)O)[C@@H](/C=C/CC/C=C/CCCCCCCCC)O)O
CCCCCCCCCCCCCCCC[C@H](C(=O)N[C@@H](CO[C@H]1[C@@H]([C@H]([C@@H]([C@H](O1)CO)O)O)O)[C@@H](/C=C/CC/C=C/CCCCCCCCC)O)O
C[C@]12CCC[C@@]([C@@H]1CC[C@]34C2CC[C@](C3)(C(=O)C4)CO)(C)C(=O)OC
C[C@]12CCC[C@@]([C@@H]1CC[C@]34C2CC[C@](C3)(C(C4)O)CO)(C)C(=O)OC
C[C@@]1(CCC2C(=CC[C@@H]3[C@@]2([C@@H](CCC3(C)C)O)C)C1)[C@@H](CO)O
C[C@@]12CCC3[C@@]4([C@@H](CCC3(C1)O[C@H]2CO)C(CC[C@H]4O)(C)C)C
C[C@@]12CCC[C@@]([C@H]1CC[C@]34[C@H]2CC[C@]5(C3)[C@@](C4)(CO5)O)(C)C(=O)OC
C[C@]12CC[C@H]3[C@@]4(CCC[C@@]([C@H]4CC[C@@]3(C1)CC2=O)(C)C=O)C
C1=CC(=CC=C1/C=C\C(=O)OC[C@@H]2[C@H]([C@@H]([C@H]([C@@H](O2)OC3=CC(=C4C(=C3)OC(=CC4=O)C5=CC=C(C=C5)O)O)O)O)OC(=O)/C=C/C6=CC=C(C=C6)O)O
C[C@H]1C[C@@H]2CCC[C@H]3N2[C@H](C1)C[C@H]4N3C(=O)CCC4
C1=CC(=C(C=C1C=C2C(=O)C3=C(C=C(C=C3O2)O)O[C@H]4C([C@H]([C@@H](C(O4)CO)O)O)O)O)O
C[C@H]1[C@H]([C@H]([C@H]([C@@H](O1)O[C@@H]2[C@H]([C@@H]([C@H](O[C@H]2O[C@H]3CO[C@H]([C@@H]([C@H]3O)O)OC4CCC5(C(C4(C)CO)CCC6(C5CC=C7C6(CCC8(C7CC(CC8)(C)C)C(=O)O[C@H]9[C@@H]([C@H]([C@@H]([C@H](O9)CO)O)O)O)C)C)C)CO)O)O)O)O)O
CCCCCCCCCCCCCCCCCCCCCCCCCCO
CCCCCCCCCCCCCCCCCCCCCCCCCCOC(=O)CCCCCCCCCCCCCCCCCCCCCCCCC
CCCCCCCCCCCCCCCCCCCCCCCCCCOC(=O)CCCCCCCCCCCCCCCCCCCCCCC
CCCCCCCCCCCCCCCCCCCCCCCCCCCC(=O)OCCCCCCCCCCCCCCCCCCCCCCCCCC
C[C@@H]1[C@H](OC2=C(C1=O)C(=C3C(=C2)C(=C(C=C3O)O)C4=C(C=C(C5=C(C6=C(C=C54)O[C@@H]([C@H](C6=O)C)C)O)O)O)O)C
C[C@@H]1CCC[C@H](C(=O)OC[C@@H](CCC[C@H](C(=O)OC1)C2CN=C(N2)N)C)C3CN=C(N3)N
CC1=C[C@H](C[C@H]([C@@H]1C2=C(C=C(C=C2)O)O)C(=O)C3=C(C(=C(C=C3)O)CC=C(C)C)O)C4=C(C=C(C=C4O)C5=CC6=C(O5)C=C(C=C6)O)O
C1=CC(=CC=C1/C=C/C(=O)C2=C(C=C(C=C2O)O)O)O
CC(C)(C=C)C1=CC2=C(C=C3C(=C2)C=CO3)OC1=O
COC1=CC=C(C=C1)[C@@H]2[C@@H](C(=O)C3=C(C=C(C=C3O2)O)O)C4[C@H](OC5=CC(=CC(=C5C4=O)O)O)C6=CC=C(C=C6)OC
C1C(OC2=C(C1=O)C(=CC(=C2CC3=CC=CC=C3O)O)O)C4=CC=CC=C4
CCC1=CC2=C(C=CC2=C(C=C1)C)C
C/C/1=C/CC(/C(=C\C(C2C(C1)OC(=O)C2=C)OC(=O)C)/C)OC(=O)C
CC(=CCC1=C(C=CC(=C1)C2=COC3=CC4=C(C=CC(O4)(C)C)C(=C3C2=O)O)O)C
C/C(=C\C1C(CC2=CNC3=CC=CC1=C23)NC)/CO
C[C@H]1[C@H]([C@H]([C@H]([C@@H](O1)OC2=C(OC3=C(C2=O)C(=CC(=C3CC=C(C)C)O[C@H]4[C@@H]([C@H]([C@@H]([C@H](O4)CO)O)O)O)O)C5=CC=C(C=C5)OC)O)O[C@H]6[C@@H]([C@H]([C@@H]([C@H](O6)COC(=O)C)OC(=O)C)O)O)OC(=O)C
C[C@@H]1[C@@H]2CC(=O)O[C@H]3[C@@]24CO[C@@]([C@H]1O)([C@@H]4[C@@]5([C@@H](C3)C(=CC(=O)[C@H]5O)C)C)O
CCN1CC2(CCC(C34C2C(C(C31)C5(CC(C6CC4C5C6O)OC)O)OC)OC)COC
C[C@@]12CC[C@H]3C(=O)O[C@H](C[C@]3([C@@H]1[C@H]4[C@H]5[C@@H]([C@@]2(C(=O)O4)O)O5)C)C6=COC=C6
COC1=C(C=C(C=C1)CC=C)O
C1CCN(CC1)C(=O)/C=C\C=C/C2=CC3=C(C=C2)OCO3
C=CCC1=CC=C(C=C1)O
COC1=C(C=C2C3CC4=C(CN3CCC2=C1)C5=C(C=C4)OCO5)O
C[N+]1=C2C(=C3C=CC(=C(C3=C1)OC)OC)C=CC4=CC5=C(C=C42)OCO5.[OH-]
CN1CC2=C(C=CC3=C2OCO3)[C@H]4[C@@H]1C5=CC6=C(C=C5C[C@H]4O)OCO6.Cl
CC(=O)C1(C2=C(O1)C3=C(C2=O)C(=CC=C3)O)N
CC(=O)O[C@H]1C=CC(=O)O[C@H]1[C@@H]2[C@@H](O2)C3=CC=CC=C3
C[N+]1=C2C3=CC4=C(C=C3C=C(C2=C5C=CC(=C(C5=C1)OC)OC)OC)OCO4
C[N+]1=C2C3=CC4=C(C=C3C=C(C2=C5C=CC6=C(C5=C1)OCO6)OC)OCO4
CN1C=CC2=CC(=C(C(=C2C1=O)OC)O)OC
CN1CC(C2=CC(=C(C=C2C1)O)OC)C3=CC=C(C=C3)O
C[C@H]1[C@@H]([C@H]([C@H]([C@@H](O1)O[C@@H]2[C@H](O[C@H]([C@@H]([C@H]2O)O)OC[C@@H]3[C@H]([C@@H]([C@H]([C@@H](O3)OC(=O)[C@]45CC[C@H]([C@@H]4[C@H]6C[C@@H]7[C@H]8[C@]([C@@]6(CC5)C)(CC[C@H]([C@@]8([C@@H](CC(=O)O7)O)C)C(=C)C)C)C(=C)C)O)O)O)CO)O)O)O
C[C@]12CCC(C(C1CC[C@@]3(C2CC=C4C3(CC[C@@]5([C@H]4CC(CC5)(C)C)C(=O)O[C@H]6[C@@H]([C@H]([C@@H]([C@H](O6)CO)O)O)O)C)C)(C)C)O[C@H]7[C@@H]([C@H]([C@@H]([C@H](O7)C(=O)O)O[C@H]8[C@@H]([C@H]([C@@H](CO8)O)O)O)O)O
CC(=CCC[C@@](C)([C@H]1CC[C@@]2([C@@H]1[C@@H](C[C@H]3[C@]2(CC[C@@H]4[C@@]3(CC[C@@H](C4(C)C)O[C@H]5[C@@H]([C@H]([C@@H]([C@H](O5)CO[C@H]6[C@@H]([C@H]([C@@H](CO6)O)O)O)O)O)O[C@H]7[C@@H]([C@H]([C@@H]([C@H](O7)CO)O)O)O)C)C)O)C)O)C
C[C@]12CC[C@@H](C([C@@H]1CC[C@@]3([C@@H]2CC=C4[C@]3(CC[C@@]5([C@H]4CC(CC5)(C)C)C(=O)O[C@H]6[C@@H]([C@H]([C@@H]([C@H](O6)CO)O)O)O)C)C)(C)C)O[C@H]7[C@@H]([C@H]([C@@H]([C@H](O7)C(=O)O)O[C@H]8[C@@H]([C@H]([C@@H](O8)CO)O)O)O)O
C[C@]12CCC(C(C1CC[C@@]3(C2CC=C4[C@]3(CC[C@@]5([C@@H]4CC(CC5)(C)C)C(=O)O[C@H]6[C@@H]([C@H]([C@@H]([C@H](O6)CO)O)O)O)C)C)(C)C)O[C@H]7[C@@H]([C@H]([C@@H]([C@H](O7)C(=O)O)O)O)O
CC1=CC2=C(C=C1)C(=O)C=C(C2=O)C
CN1CC[C@@]2([C@H]1NC3=CC=CC=C32)[C@@]45CCN([C@@H]4NC6=CC=CC=C56)C
CC1COC2(CC1O[C@H]3[C@@H]([C@H]([C@@H]([C@H](O3)CO)O)O)O)C(C4C(O2)CC5C4(CCC6C5CC(=O)[C@@H]7C6(CCC(C7)O[C@H]8[C@@H]([C@H]([C@@H]([C@H](O8)CO[C@H]9[C@@H]([C@H]([C@H](CO9)O)O)O)O)O)O)C)C)C
CC1=C(OC2C1[C@@]3(C(C2)C4CC(=O)[C@H]5C[C@H](CC[C@@]5(C4CC3=O)C)O[C@H]6[C@@H]([C@H]([C@@H]([C@H](O6)CO[C@@H]7[C@@H]([C@@H]([C@@H](CO7)O)O)O)O[C@@H]8[C@@H]([C@H]([C@H](CO8)O)O)O)O)O)C)CC[C@@H](C)CO[C@H]9[C@@H]([C@H]([C@@H]([C@H](O9)CO)O)O)O
COC1=C(C=C(C=C1)C2=C3C=C4C(=CC3=CC5=C2C(=O)OC5)OCO4)OC
COC1=C(C=C(C=C1)C2=C3C(=C(C4=CC5=C(C=C42)OCO5)OC)COC3=O)OC
C[C@]1(CC[C@@H]2[C@@H]([C@@H]3[C@@H]1CC(=O)C3=C)OC(=O)C2=C)O
COC1=C(C=C(C=C1)/C=C\2/[C@@H](COC2=O)CC3=CC4=C(C=C3)OCO4)OC
CC1=CC(=O)C2=C(C1=O)C=CC(=C2O)C3=C(C(=O)C4=C(C3=O)C(=CC=C4)O)C
C1=CC=C2C(=C1)C(=O)/C(=C/C3=CC=C(C=C3)Cl)/O2
CCCC(=O)NCCCCCl
C1[C@@H]([C@H](OC2=CC(=C(C(=C21)O)Cl)O)C3=CC(=C(C=C3)O)O)O
C[C@@H]([C@@H]1C[C@@H]2[C@@H]([C@@H]3[C@]14[C@H](O4)[C@H]([C@]3(C)O)Cl)OC(=O)C2=C)O
CC(CCC(=O)C(C)C1C(=O)CC2[C@@]1(CCC3C2CC=C4[C@@]3(CC[C@@H](C4)O)C)C)CCl
CC[C@H]1[C@H](C[C@@H]2[C@@]1(CC[C@H]3[C@H]2C[C@@H]([C@@H]4[C@@]3(CC[C@@H](C4)O)C)O)C)O[C@]5(CC[C@H](CO5)C)C
C1=CC=C2C(=C1)C(=O)C(O2)(CC3=CC=C(C=C3)Cl)O
CC#CC#CC1=CC=C(S1)C#CC(CCl)O
C[C@@H](CCC(C(C)(C)Cl)O)[C@@H]1CC[C@@]2([C@@]1(CCC3C2=CCC4[C@@]3(CCC(=O)C4(C)C)C)C)C
C.C.C.C.C.C.C.C.C.C.C.C.C.C.C.C.C.C.C.C.C.C.C.C.C.C.C.C.C.C.C.C.C.C.C.C.C.C.CC.CC.CC[C@@H](C)OC.CC[C@H](C)OCCCO.CO.COC.COC.O.O.O.O.O.O.O.O.O.O.O.O.O.O.O.O.O.O.O.O.O.O.O.O.O.O
CC#CC#CC#C/C=C/1\C=CC(CO1)Cl
CCCCCCCC1C(O1)CC#CC#CC(C(CCl)O)O
CC(=CCC/C(=C/CC1=C(C=C(C=C1O)/C=C/C2=C(C=C(C=C2)O)O)O)/C)C
CCC1=C(C2=NC1=CC3=C(C4=C([N-]3)C(=C5[C@H]([C@@H](C(=N5)C=C6C(=C(C(=C2)[N-]6)C=C)C)C)CCC(=O)[O-])C(=C4[O-])C(=O)OC)C)C.[Mg+2]
C[C@H](CCCC(C)C)[C@H]1CCC2=C3CC=C4C[C@H](CC[C@@]4([C@H]3CC[C@]12C)C)O
CC(C)CCCC(C)[C@H]1CCC2[C@@]1(CCC3C2CC=C4[C@@]3(CC[C@@H](C4)OC(=O)/C=C\C5=CC(=C(C=C5)O)OC)C)C
CC(CCC(=O)O)C1CCC2C1(C(CC3C2C(CC4C3(CCC(C4)O)C)O)O)C
[2H]C([2H])([2H])[N+](C([2H])([2H])[2H])(C([2H])([2H])[2H])C([2H])([2H])C([2H])([2H])O
CC1=CC(CC(C1/C=C/C(=C/C=C/C(=C/C=C/C=C(\C)/C=C/C=C(\C)/C2C=C3C(CC(CC3(O2)C)O)(C)C)/C)/C)(C)C)O
C1=CC(=C(C=C1C2=C(C=C3C(=CC(=CC3=[O+]2)O)O)O[C@H]4C(C([C@@H](C(O4)CO)O)O)O)O)O
C[C@@]12CC[C@H](C[C@H]1C(=C)[C@@H](CC2)O)C(C)(C)O
CC1=CC[C@H]2C(=O)[C@@H]1C2(C)C
CC(C)([C@@H]1CCC(=C)[C@H](CCC(=C)[C@H](C1)O)O)O
CC1=CC(=C2C=C3C(=CC2=C1)C=CC(=C3O)O)O
C1=CC2=C(C(=C1)O)C(=O)C3=C(C2=O)C=CC=C3O
C1=CC=C(C=C1)C2=CC(=O)C3=C(O2)C=C(C=C3[O-])O
COC1=C(C=CC(=C1)C2=CC(=O)C3=C(C=C(C=C3O2)O)O)[O-]
COC1=C(C=CC(=C1)C2=CC(=O)C3=C(C=C(C=C3O2)O[C@@H]4[C@@H]([C@H]([C@@H]([C@H](O4)CO)O)O)O[C@H]5[C@@H]([C@](CO5)(CO)O)O)O)O
CC1=C(C(=C2C(=C1)C(=O)C3=CC(=C(C(=C3C2=O)OC)OC)OC)OC)O
CN1CCCC1C2=C(C=CC3=C2NC4=C3CC[N+]5=C4C(=C(C(=C5)C=C)CC6C7=C(CCN6C)C8=CC=CC=C8N7)O)O.[Cl-]
CC1=CC2C(C(=C1)O)C(=O)C3=C(C2=O)C=CC=C3O
COC1=C(C=CC(=C1)C2=C(C(=O)C3=C(C(=C(C=C3O2)OC)OC)O)OC)O
COC1=C(C(=C2C(=C1)OC(=C(C2=O)OC)C3=CC(=C(C=C3)O)O)O)OC
COC1=CC(=C2C(=C1)OC(=C(C2=O)OC)C3=CC(=C(C=C3O)OC)OC)O
COC1=CC(=C2C(=C1)OC(=C(C2=O)OC)C3=CC(=C(C=C3OC)OC)O)O
COC1=C(C(=C2C(=C1)C=CC3=C2C=CC(=C3OC)O)OC)OC
C[C@H]1CCC2CC3CCC4C(C3CN2C1)CC5C4CC(=O)C6[C@@]5(CCC(C6)O)C
CCC/C=C\1/C2=C(C=CC=C2O)C(=O)CO1
CC1=C(N=C(C(=N1)C)C)C
C(C[N+](=O)[O-])C(=O)OCC1C(C(C(C(O1)OC(=O)CC[N+](=O)[O-])O)O)O
C1=CC(=O)OC2=CC(=C(C=C21)O)OC3C(C(C(C(O3)CO)O)O)O
CCCC/C=C/C=C/C=C/C#CC#CCCCO
CCC[C@H](/C=C/C=C/C=C/C#CC#CCCCO)O
COC1=C(C=C2C(=C1)C(=C3C(=C2O[C@H]4[C@@H]([C@](CO4)(CO[C@H]5[C@@H]([C@H]([C@@H](CO5)O)O)O)O)O[C@H]6[C@@H]([C@H]([C@H](CO6)O)O)O)COC3=O)C7=CC8=C(C=C7)OCO8)OC
C[C@H]1[C@H]2[C@H](C[C@@]3([C@@]2(CC[C@]45C3CC[C@@H]6[C@]4(C5)CC[C@@H](C6(C)C)OC7C(C(C(CO7)O)O)O)C)C)O[C@]8([C@@H]1OC([C@H]8O)(C)C)O
C[C@H](CCC=C(C)C)C1=CC[C@@]2([C@@]1(CC[C@]34[C@H]2CC[C@@H]5[C@]3(C4)CC[C@@H](C5(C)C)O)C)C
CC1CC2(C3C(O3)(C(O2)O)C)OC4C1[C@]5(CC[C@@]67C[C@@]68CCC(C([C@@H]8CC=C7[C@@]5(C4)C)(C)C)O[C@H]9[C@@H]([C@H]([C@@H](CO9)O)O)O)C
C1=CC(=C(C=C1CCO)O[C@H]2[C@@H]([C@H]([C@@H]([C@H](O2)CO)O)O)O)O
CC1CC2C(OC3(C1C4(CCC56CC57CCC(C(C7CCC6C4(C3O)C)(C)C)O)C)O2)C(C)(C)O
C[C@@H]1CC2[C@@H](O[C@]3(C1[C@]4(CC[C@@]56C[C@@]57CCC(=O)C(C7CCC6[C@@]4([C@H]3O)C)(C)C)C)O2)C(C)(C)O
C[C@]12CC[C@@]34C[C@@]35CC[C@@H](C(C5CCC4C1(C([C@]67C2CCC(O6)[C@H](O7)C(C)(C)O)O)C)(C)C)O[C@H]8[C@@H]([C@H]([C@@H](CO8)O)O)O
COC1=C(C=C(C=C1)/C=C/C(=O)OCC(=O)CC2=CC(=C(C=C2)O)O)O
COC1=C(C=CC(=C1)/C=C/C(=O)OCC(=O)CC2=CC(=C(C=C2)O)O)O
COC1=C(C=C(C=C1)/C=C/C(=O)OCC(=O)C(C2=CC(=C(C=C2)O)O)OC)O
COC1=C(C=CC(=C1)/C=C/C(=O)OCC(=O)C(C2=CC(=C(C=C2)O)O)OC)O
C[C@@H]1CC2[C@@H](O[C@]3(C1[C@]4(C(CC56CC57CC[C@@H](C(C7CCC6[C@@]4([C@H]3O)C)(C)C)O[C@@H]8[C@@H]([C@H]([C@H](CO8)O)O)O)O)C)O2)C(C)(C)O
C[C@@H]1CC2C(OC3([C@H]1[C@]4(CCC56CC57CCC(C(C7CCC6[C@@]4([C@H]3O)C)(C)C)O[C@H]8[C@@H]([C@H]([C@@H](CO8)O)O[C@H]9[C@@H]([C@H]([C@@H](CO9)O)O)O)O)C)O2)C(C)(C)O
C[C@@H]1C[C@H]2[C@H](O[C@]3([C@H]1[C@]4(CC[C@@]56C[C@@]57CC[C@@H](C([C@@H]7CC[C@H]6[C@@]4([C@H]3O)C)(C)C)O[C@H]8[C@@H]([C@H]([C@@H](CO8)O)O)O)C)O2)C(=C)C
CC1CC2C(OC3(C1[C@]4(CC[C@@]56C[C@@]57CC[C@@H](C(C7CCC6C4(C3O)C)(C)C)O[C@H]8[C@@H]([C@H]([C@@H]([C@H](O8)CO)O)O)O)C)O2)C(C)(C)O
C1=CC(=C(C=C1C2=CC(=O)C3=C(C=C(C=C3O2)O[C@H]4[C@@H]([C@H]([C@@H]([C@H](O4)CO)O)O)O)O)O)O
C1C(C(OC2=C3C(CC(=O)OC3=CC(=C21)O)C4=CC(=C(C=C4)O)O)C5=CC(=C(C=C5)O)O)O
C1[C@H]([C@H](OC2=C3[C@H](CC(=O)OC3=CC(=C21)O)C4=CC(=C(C=C4)O)O)C5=CC(=C(C=C5)O)O)O
C=C[C@H]1CN2CCC1C[C@H]2C3=C(C4=CC=CC=C4N3)CCO
C=CC1CC(CCN1)CCC(=O)C2=CC=NC3=CC=CC=C23
C=C[C@H]1C[NH+]2CCC1C[C@H]2[C@@H](C3=CC=NC4=CC=CC=C34)O
C=C[C@H]1CN2CCC1CC2C(C3=CC=NC4=CC=CC=C34)O
CC(C)C12CCC(O1)(CC2)C
CC1(C2CCC(O1)(CC2)C)C
C1=CC=C(C=C1)/C=C/C=O
C1=CC=C(C=C1)/C=C/C(=O)N
C[C@@H]1C(=O)C[C@]2([C@H](C34C1(C2(C)C)[C@H]([C@@H]([C@@]3(CC[C@@H](C4=C)OC(=O)/C=C/C5=CC=CC=C5)C)OC(=O)C)O)O)O
CC1=C2[C@H]([C@@H]([C@@]3(CC[C@@H](C(=C)[C@H]3[C@@H]([C@@](C2(C)C)(CC1=O)O)O)OC(=O)/C=C/C4=CC=CC=C4)C)O)OC(=O)C
CC1=C2[C@H]([C@@H]([C@@]3(CC[C@@H](C(=C)[C@H]3[C@@H]([C@@H](C2(C)C)CC1=O)OC(=O)C)OC(=O)/C=C/C4=CC=CC=C4)C)O)O
CC1=C2[C@H]([C@@H]([C@@]3(CC[C@@H](C(=C)[C@H]3[C@@H]([C@@](C2(C)C)(CC1=O)O)O)OC(=O)/C=C/C4=CC=CC=C4)C)OC(=O)C)OC(=O)C
C1=CC=C(C=C1)/C=C/C(=O)O[C@@H]2[C@H]([C@@H]([C@H](O[C@H]2OC(=O)C3=CC(=C(C(=C3)O)O)O)CO)O)O
C1=CC=C(C=C1)/C=C/C(=O)O[C@@H]2[C@H]([C@@H]([C@H](O[C@H]2O)CO)O)O
CC(C)/C(=C/C(=O)OC(C)[C@@]1(CC[C@]2([C@@]1([C@@H](CC3[C@]2(CC=C4[C@@]3(CC[C@@H](C4)O)C)O)OC(=O)/C=C/C5=CC=CC=C5)C)O)O)/C
C[C@@H]1C(=O)C[C@H]2[C@H](C34C1(C2(C)C)[C@H]([C@@H]([C@@]3(CC[C@@H](C4=C)OC(=O)/C=C/C5=CC=CC=C5)C)O)O)O
CC1=C2[C@H]([C@@H]([C@@]3(CC[C@@H](C(=C)C3[C@@H]([C@@](C2(C)C)(CC1=O)O)O)OC(=O)/C=C/C4=CC=CC=C4)C)O)O
CC1=C2[C@H]([C@@H]([C@@]3(CC[C@@H](C(=C)[C@H]3[C@@H]([C@@](C2(C)C)(CC1=O)O)OC(=O)C)OC(=O)/C=C/C4=CC=CC=C4)C)OC(=O)C)OC(=O)C
C/C=C(\C)/C(=O)OC(C)[C@@]1(CC[C@]2([C@@]1([C@@H](CC3[C@]2(CC=C4[C@@]3(CC[C@@H](C4)O)C)O)OC(=O)/C=C/C5=CC=CC=C5)C)O)O
C1[C@H]([C@H](OC2=C1C(=CC(=C2[C@@H]3[C@H]([C@H](OC4=C5[C@@H]6[C@H]([C@](OC5=CC(=C34)O)(OC7=C6C(=CC(=C7[C@@H]8[C@H]([C@H](OC9=CC(=CC(=C89)O)O)C1=CC(=C(C=C1)O)O)O)O)O)C1=CC(=C(C=C1)O)O)O)C1=CC(=C(C=C1)O)O)O)O)O)C1=CC(=C(C=C1)O)O)O
CC(=O)OC/C=C\C1=CC=CC=C1
C1=CC=C(C=C1)/C=C/COC(=O)C2=CC=CC=C2
C1=CC=C(C=C1)/C=C/COC(=O)/C=C/C2=CC=CC=C2
CC1CC2C(CCC3C2(CCC(C3)O)C)C45C1CC(C4O5)C.C1=CC(=O)OC=C1
CC(=O)O[C@@H]1[C@@H]([C@]2(CCC3C([C@@]24[C@@H]1O4)CC[C@H]5[C@@]3(CC[C@@H](C5)OC(=O)CCCCCCC(=O)O)C)C)C6=COC(=O)C=C6
CC(=O)O[C@@H]1[C@@H]([C@]2(CC[C@H]3[C@H]([C@@]24[C@@H]1O4)CC[C@H]5[C@@]3(CC[C@@H](C5)O)CO)C)C6=COC(=O)C=C6
CC(=O)O[C@@H]1[C@@H]([C@]2(CCC3[C@H]([C@@]24[C@@H]1O4)CC[C@]5([C@@]3(CC[C@@H](C5)O)C)O)C)C6=COC(=O)C=C6
CC(=O)OC1C(C2(CCC3C(C24C1O4)CCC5[C@@]3(CCC(C5)OC(=O)CCCCCCC(=O)NC(CCCN=C(N)N)C(=O)O)C)C)C6=COC(=O)C=C6
CCC(C)C(=O)O[C@@H]1C2C=C3C(CCC4(C3CC(=O)OC4C5=COC=C5)C)C(C2=O)(C(C1(C)C)CC(=O)OC)C
COC1=C(C=CC(=C1)C2=CC(=O)C3=CC(=C(C=C3O2)OC)OC)O
COC1=C(C=CC(=C1)C2=CC(=O)C3=C(C(=C(C=C3O2)OC)OC)O)O[C@@H]4[C@H]([C@@H]([C@H]([C@@H](O4)CO)O)O)O
COC1=C(C(=C2C(=C1)OC(=CC2=O)C3=CC(=C(C=C3)O)O)O)OC
COC1=C(C(=C2C(=C1)OC(=CC2=O)C3=CC(=C(C=C3)O[C@@H]4[C@H]([C@@H]([C@H]([C@@H](O4)CO)O)O)O)O)O)OC
COC1=C(C(=C2C(=C1)OC(=CC2=O)C3=CC=C(C=C3)O)O)OC
C[N+]12CCC3=CC(=C(C=C3[C@@H]1CC4=C(C2)C(=C(C=C4)OC)O)O)OC
CN1CCC2=CC(=C(C3=C2[C@H]1CC4=CC=C(COC5=C(C=C6CCNC(=C6C5=O)CC7=CC=C(O3)C=C7)OC)C=C4)OC)OC
C1COC2[C@H]3[C@@H]1CC([C@]3(CO2)O)Cl
C1COC2[C@H]3[C@@H]1CC([C@]3(CO2)O)O
C[C@H]1[C@@H]([C@H]([C@H]([C@@H](O1)O[C@@H]2[C@H]([C@@H](O[C@@H]([C@H]2OC(=O)/C=C/C3=CC(=C(C=C3)O)O)CO[C@H]4[C@@H]([C@H]([C@@H]([C@H](O4)OC)O)O)O)OCCC5=CC(=C(C=C5)O)OC)O)O)O)O
C[C@H]1[C@@H]([C@H]([C@H]([C@@H](O1)O[C@@H]2[C@H]([C@@H](O[C@@H]([C@H]2OC(=O)/C=C/C3=CC(=C(C=C3)O)OC)CO[C@H]4[C@@H]([C@H]([C@@H]([C@H](O4)CO)O)O)O)OCCC5=CC(=C(C=C5)O)OC)O)O)O)O
C[C@H]1[C@H]([C@H]([C@H]([C@@H](O1)O[C@@H]2[C@H]([C@@H](O[C@@H]([C@H]2OC(=O)/C=C/C3=CC(=C(C=C3)O)O)CO)OCCC4=CC(=C(C=C4)O)OC)O)O)O)O
C[C@H]1[C@H]([C@H]([C@H]([C@@H](O1)O[C@@H]2[C@H]([C@@H](O[C@@H]([C@H]2OC(=O)/C=C/C3=CC(=C(C=C3)O)OC)CO)OCCC4=CC(=C(C=C4)O)OC)O)O)O)O
CC(CO[C@H]1[C@@H]([C@H]([C@@H]([C@H](O1)CO)O)O[C@H]2[C@@H]([C@@H]([C@H]([C@@H](O2)O)O)O)O)O)C3=CC(=C(C=C3)O)OC
C[C@H]1[C@H]([C@H]([C@H]([C@@H](O1)O[C@H]2[C@@H]([C@H](OC([C@@H]2O)O)CO)OC(=O)CCC3=CC(=C(C=C3)O)O)O)O)O
C[C@H]1[C@H]([C@H]([C@H]([C@@H](O1)OCCC2=CC=C(C=C2)O)O)O[C@H]3[C@@H]([C@H]([C@@H]([C@H](O3)CO)O)O)O)O
CC(=O)O[C@@H]1[C@H]([C@@H]([C@H](O[C@H]1OCCC2=CC(=C(C=C2)O)O)CO)O)O[C@H]3[C@@H]([C@@H]([C@H]([C@@H](O3)O)O)O)O
CC(=CCC/C(=C/C=O)/C)C.CC(=CCC/C(=C\C=O)/C)C
CC(=CCC/C(=C/C=O)/C)C
CC(=CCC/C(=C\C=O)/C)C
C1=C(C=C2C(=C1O)C(=O)C3=C(C=C(C=C3C2=O)O)O)CO
C[C@H](CCC=C(C)C)CC=O
C[C@H](CCC=C(C)C)CCO
C[C@@H](CCC=C(C)C)CCOC(=O)C
COC1=CC(=C2C=CC(=O)OC2=C1)OC
C/C=C(/CC[C@@H](C)C1CCC2[C@@]1(CCC3C2=CC[C@@H]4[C@@]3(CC[C@@H]([C@H]4C)O)C)C)\C(C)C
C(C[C@H](C(=O)O)N)CNC(=O)N
COC1=CC(=CC(=C1OC(CO)C(C2=CC(=C(C=C2)O[C@H]3[C@@H]([C@H]([C@@H]([C@H](O3)CO)O)O)O)OC)O)OC)/C=C/CO
CC1=CC(=C2C(=C1OC)NC3=C(C2=O)C=CC=C3O)O
C1CCC/C=C/CCCCCCCC(=O)CCC1
C[C@H]1[C@H]([C@H]([C@H]([C@@H](O1)O[C@H]2[C@@H](O[C@H]([C@H]([C@@H]2O)O)OC[C@H]3[C@@H]([C@H]([C@@H]([C@@H](O3)OC(=O)C45CCC(=C)CC4C6=CCC7C8(CCC(C(C8CCC7([C@@]6(CC5)C)C)(C)C)O[C@H]9[C@@H]([C@H]([C@@H](O9)CO)O)O)C)O)O)O)CO)O)O)O
C[C@H]1[C@H]([C@H]([C@H]([C@@H](O1)OC2[C@@H](O[C@H]([C@H]([C@@H]2O)O)OC[C@H]3[C@@H]([C@H]([C@@H]([C@@H](O3)OC(=O)C45CC[C@@]6(C(=CCC7C6(CCC8C7(CCC(C8(C)C)O[C@H]9[C@@H]([C@H]([C@@H](O9)CO)O)O)C)C)C4CC(CC5)(C)C)C)O)O)O)CC(=O)OC)O)O)O
COC1=CC(=CC(=C1O)OC)[C@@H]2[C@H]([C@H](CO2)C(=O)C3=CC(=C(C(=C3)OC)O)OC)CO
CC1(C=CC2=C(C3=C(C(=C2O1)C(C)(C)C=C)OC(=O)C(=C3)C(C)(C)C=C)O)C
CN1[C@H]([C@H]([C@@H](C1=O)O)C2=CC=CC=C2)C(C3=CC=CC=C3)O
CC1(CC(=O)C2=C(O1)C3=C(C(=C2O)C(C)(C)C=C)OC(=O)C=C3)C
CC1(CC(=O)C2=C(O1)C=C3C(=C2O)C=CC(=O)O3)C
COC1=CC(=C2C(=C1)C3=CC(=C(C=C3N2)O)C=O)OC
CC(=CCC1=C2C3=CC=CC=C3NC2=C(C=C1C=O)O)C
COC(=O)C1=CC(=C2C(=C1)C3=CC=CC=C3N2)O
CC(=CCC1=C2C3=CC=CC=C3NC2=C(C=C1C(=O)OC)O)C
COC1=CC2=C(C=C1)C3=CC(=C(C=C3N2)OC)C(=O)OC
COC1=CC2=C(C=C1)NC3=CC(=C(C=C32)C=O)O
COC1=CC2=C(C=C1)C3=CC(=C(C=C3N2)OC)C(=O)O
C1=CC2=C(C=C1O)NC3=CC(=C(C=C23)C=O)O
CC1CC2CC(=O)C3(CCCN4C3(C1)C2CCC4)O
C[C@]12CC[C@H](C([C@@H]1CC[C@@H]([C@@H]2CC[C@H]3[C@H](CC[C@@H]4[C@@]3(CC[C@H](C4(C)C)O)C)O)O)(C)C)O
C[C@H]1C[C@]23[C@@H]4CCCN2CCC[C@@H]3C(=O)C[C@H]4[C@@H]1O
CC1=C(C(=C2C(=C1)C(=O)C3=C(C2=O)C(=CC(=C3O)O)O)O)C(=O)O
C1=CC2=C(C=C1Cl)O[C@@H](C(=O)N2O)O[C@@H]3[C@@H]([C@H]([C@H]([C@H](O3)CO)O)O)O
COC1=C(C=C2C(=C1)C(=C3C(=C2O[C@H]4[C@@H]([C@H]([C@@H]([C@H](O4)CO)O)O)O)COC3=O)C5=CC6=C(C=C5)OCO6)OC
COC1=C(C=C(C=C1)[C@@H]2[C@H]3CO[C@@H]([C@H]3CO2)C4=CC(=C(C=C4)OC)O)O
C[C@H]1[C@@H]([C@H]([C@H]([C@@H](O1)O[C@@H]2[C@H]([C@H](CO[C@H]2O[C@H]3CC[C@]4(C(C3(C)C)CC[C@@]5(C4CC=C6[C@]5(CC[C@@]7([C@H]6CC(CC7)(C)C)C(=O)O)C)C)C)O)O)O)O[C@H]8[C@@H]([C@H]([C@@H](CO8)O[C@H]9[C@@H]([C@H]([C@@H]([C@H](O9)CO)O)O)O)O)O)O
C[C@@H]1[C@@H]([C@@H]([C@@H]([C@H](O1)O[C@H]2[C@H](O[C@@H]([C@@H]([C@H]2O)O)O[C@H]3[C@H](O[C@@H]([C@@H]([C@H]3O)O)OC[C@@H]4[C@@H]([C@@H]([C@H]([C@@H](O4)OC(=O)C56CCC(CC5C7=CCC8C9(CC[C@@H](C(C9CCC8(C7(CC6)C)C)(C)C)O[C@H]1[C@@H]([C@@H]([C@H]([C@@H](O1)C)O[C@H]1[C@@H]([C@H]([C@H](CO1)O)O)O[C@H]1[C@@H]([C@H]([C@H](CO1)O)O)O[C@H]1[C@@H]([C@H]([C@@H](CO1)O[C@H]1[C@@H]([C@H]([C@@H]([C@H](O1)CO)O)O)O)O)O…
C[C@H]1[C@@H]([C@H]([C@H]([C@@H](O1)O[C@H]2CCC3(C(C2(C)C)CCC4(C3CC=C5C4(CCC6(C5CC(CC6)(C)C)C(=O)O)C)C)C)O)O)O[C@H]7[C@@H]([C@H]([C@H](CO7)O)O)O[C@H]8[C@@H]([C@H]([C@@H](CO8)O)O)O[C@H]9[C@@H]([C@H]([C@@H](CO9)O[C@H]1[C@@H]([C@H]([C@@H]([C@H](O1)CO)O)O)O)O)O
C[C@@H]1[C@@H]([C@@H]([C@@H]([C@H](O1)O[C@H]2[C@H](O[C@@H]([C@@H]([C@H]2O)O)O[C@H]3[C@H](O[C@@H]([C@@H]([C@H]3O)O)OC[C@@H]4[C@H]([C@@H]([C@H]([C@@H](O4)OC(=O)C56CCC(CC5C7=CCC8C9(CCC(C(C9CCC8(C7(CC6)C)C)(C)C)O[C@H]1[C@@H]([C@@H]([C@H]([C@@H](O1)C)O[C@H]1[C@@H]([C@H]([C@H](CO1)O)O)O[C@H]1[C@@H]([C@H]([C@H](CO1)O)O)O[C@H]1[C@@H]([C@H]([C@@H](CO1)O[C@H]1[C@@H]([C@H]([C@@H]([C@H](O1)CO)O[C@H]1[C@@H]([…
C[C@H]1[C@@H]([C@H]([C@H]([C@@H](O1)OC[C@@H]2[C@H]([C@@H]([C@H]([C@@H](O2)O[C@@H]3[C@H](O[C@H]([C@@H]([C@H]3O)O)O[C@@H]4CO[C@H]([C@@H]([C@H]4O)O)O[C@@H]5[C@H]([C@@H](CO[C@H]5O[C@@H]6[C@H]([C@@H](CO[C@H]6O[C@H]7[C@@H](O[C@H]([C@@H]([C@@H]7O)O)O[C@H]8CCC9(C(C8(C)C)CCC1(C9CC=C2C1(CCC1(C2CC(CC1)(C)C)C(=O)O[C@@H]1[C@@H]([C@H]([C@H]([C@H](O1)CO[C@H]1[C@@H]([C@H]([C@H]([C@H](O1)CO)O[C@@H]1[C@@H]([C@H]([…
CC[C@]1(CNC(=S)O1)C
COC1=C(C=CC(=C1)[C@@H]2[C@@H](OC3=C4C(=CC(=C3O2)OC)C=CC(=O)O4)CO)O
COC1=C(C=CC(=C1)[C@H]2[C@@H](OC3=C(C=C4C=CC(=O)OC4=C3O2)OC)CO)O
COC1=CC(=CC(=C1O)OC)[C@@H]2[C@H](OC3=C4C(=CC(=C3O2)OC)C=CC(=O)O4)CO
COC1=CC(=CC(=C1O)OC)C2C(OC3=C(C=C4C=CC(=O)OC4=C3O2)OC)CO
CCC(C)(C(=O)O[C@H]1C(C[C@@H]2[C@@](C(=CC(C2(C13CO3)COC(=O)C)OC(=O)C)C)(C)C4C[C@H]5C=CO[C@H]5O4)O)OC(=O)C
COC1=CC=C(C=C1)C2=CC(=O)C3=C(C(=C(C=C3O2)O[C@H]4[C@@H]([C@H]([C@H]([C@H](O4)C(=O)O)O)O)O)O)O
C[C@@H]1C[C@@H]([C@@]2([C@@H]([C@@]1(C)C3C[C@H]4C=CO[C@H]4O3)CCC[C@]25CO5)COC(=O)C)OC(=O)C
CC(=C)C1(CC[C@]2(C1C3C(=O)CC4[C@]5(CC[C@@H](C(C5CC[C@]4(C3(CC2)C)C)(C)C)O)C)C)O
CC(C)C1CC[C@]2(C1C3C(=O)CC4[C@]5(CCCC(C5CC[C@]4(C3(CC2)C)C)(C)C)C)C
CC[C@@H](CCC(C)C1CCC2[C@@]1(CCC3[C@H]2CC=C4[C@@]3(CC[C@@H](C4)O)C)C)C(=C)C
C[C@H]1[C@@H]([C@H](C(C(O1)OCC2C(C(C(C(O2)OC3=C(OC4=CC(=CC(=C4C3=O)O)O)C5=CC=C(C=C5)O)OC6C(C(C(C(O6)C)O)O)O)O)O)O)O)O
C[C@H]1/C=C(\C(=O)O[C@@H]2CC[N+]3(C2(C(=CC3)COC(=O)[C@@]1(C)OC(=O)C)[O-])C)/C=C
C[C@]12CCC[C@@]3(C1)C=CC([C@@H]3CC2)(C)C
CCCCCCCCCCCCCCCCCCCCCCCCCCCCOC(=O)/C=C/C1=CC(=C(C=C1)O)OC
C/C/1=C\CC/C(=C/[C@@H]2[C@@H]([C@H](C1)OC(=O)C(=C)[C@@H](CO)O)C(=C)C(=O)O2)/CO
CC(C)C(=O)OC(C)(C)C1CC2=C(O1)C=CC3=C2OC(=O)C=C3
CCCC[C@H]1[C@H]2CCC=C[C@H]2C(=O)O1
CC(=CCOC1=CC(=O)OC2=C1C=C3C=COC3=C2OC)C
CCCCC1C2=CCCCC2C(=O)O1
CN1[C@H]2C[C@H]([C@H](C([C@@H]1C2)OC(=O)C3=CC=CC=C3)C(=O)OC)O
COC1CC2C3C(=C1)CCN3CCC4=C2C=C(C=C4)OC
CN1CC[C@@]23CC(=O)C(=C[C@@H]2[C@@H]1CC4=C3C(=C(C=C4)OC)O)OC
COC1=CC=C2CCN3C2(C1)C4=C(CC3)COC4=O
COC1CC=C2CCN3[C@]2(C1)C4=CC(=CC(=C4CC3)OC)O
COC1=C(C=CC(=C1)O)CCC(C2=CC=C(C=C2)O)C3=C(C=C(C(=C3)CCC(=O)C4=CC=C(C=C4)O)O)O
CC(=CCC/C(=C/CC1=C2C(=CC(=C1O)O)C(=O)C3=C(C(=C(C=C3O2)O)CC=C(C)C)O)/C)C
C1CC(=O)C(C=C1)(C(=O)OCC2=C(C(=CC=C2)O)O[C@H]3[C@@H]([C@H]([C@@H]([C@H](O3)CO)O)O)OC(=O)C4=CC=CC=C4)O
C1CC2=C(C(=O)OC2=C[C@H]1O)C(C3=CC=CC=C3)O
COC1=C(C=C2[C@H](NCCC2=C1)CC3=CC=C(C=C3)O)O
CN1CCC2=CC(=C(C3=C2[C@@H]1CC4=CC=C(C=C4)OC5=C(C=CC(=C5)CC6=NCCC7=CC(=C(O3)C=C76)OC)OC)OC)OC
C1(C(C(C(C(C1O)O)O)O)O)O
CN1CCC2=CC(=C3C4=C2[C@@H]1CC5=CC=C(C=C5)OC6=C(C=CC(=C6)C[C@H]7C8=CC(=C(O3)C=C8CCN7C)O4)O)OC
CN1CCC2=CC(=C(C=C2[C@@H]1CC3=CC(=C(C=C3)OC)OC)O)OC
CN1CC[C@]23C4C1CC5=C2C(=C(C=C5)OC)OC3[C@H](C=C4)O
C[C@@H]1[C@H]([C@@H]([C@H](N1C)C2=CC(=C(C=C2)OC)OC)O)O
COC(=O)C1=COC(C2C1C[C@@H]([C@@H]2COC(=O)C3C(C(C3C4=CC=C(C=C4)O)C(=O)OC[C@H]5[C@H](CC6C5C(OC=C6C(=O)OC)O[C@H]7[C@@H]([C@H]([C@@H]([C@H](O7)CO)O)O)O)O)C8=CC=C(C=C8)O)O)O[C@H]9[C@@H]([C@H]([C@@H]([C@H](O9)CO)O)O)O
COC1=C(C(=C2COC3=C4C2=C1CCC4=CC(=C3)O)O)OC
COC1=C2CCC3=CC(=CC(=C3C2=CC(=C1OC)O)O)O
CC(C)CC(C(C(=O)O)O)(C(=O)OCC1=CC=C(C=C1)OC2C(C(C(C(O2)CO)O)O)O)O
C1=CC(=C[N+](=C1)[C@H]2[C@@H]([C@@H]([C@H](O2)COP(=O)([O-])OP(=O)([O-])OC[C@@H]3[C@H]([C@H]([C@@H](O3)N4C=NC5=C4N=CN=C5N)O)O)O)O)C(=O)N
C1=CC(=C[N+](=C1)[C@H]2[C@@H]([C@@H]([C@H](O2)COP(=O)([O-])OP(=O)(O)OC[C@@H]3[C@H]([C@H]([C@@H](O3)N4C=NC5=C4N=CN=C5N)OP(=O)(O)O)O)O)O)C(=O)N.O
CCCCCC/C=C/CCCCCCCCCC(=O)O[C@@H](C)[C@@H](C)OC(=O)CCCCCCC/C=C\CCCCCC
COC1=CC2=C(C=C1)NC(=O)O2
C[C@H]1[C@@H]2CC[C@]3([C@@H](CC[C@@]([C@@H]3[C@H]2OC1=O)(C)O)O)C
CN[C@H]1CCC2=CC(=C(C(=C2C3=CC=C(C(=O)C=C13)OC)OC)OC)OC
CC(=O)NC1[14CH2]CC2=CC(=C(C(=C2C3=CC=C(C(=O)C=C13)O)OC)OC)OC
CCCN(CCC)S(=O)(=O)C1=CC=C(C=C1)C(=O)O.CC(=O)NC1CCC2=CC(=C(C(=C2C3=CC=C(C(=O)C=C13)OC)OC)OC)OC
CC(=O)NC1CCC2=CC(=C(C(=C2C3=CC=C(C(=O)C=C13)OC)OC)OC)O[C@H]4[C@@H]([C@H]([C@@H]([C@H](O4)CO)O)O)O
CC(=O)O[C@@H]1[C@H]([C@@H]2[C@]([C@H](CCC2(C)C)O)([C@@]3([C@@]1(O[C@@](CC3=O)(C)C=C)C)O)C)O
CCOC(C)CC1=C(C2=C(C(=O)C1=O)C3(CCC(=C(C3C(C2O)O)C)C)C)O
CC1CC12C(C(=O)C3=C(C2=O)C(C(C4C3(CCC(=C4C)C)C)O)O)O
CC(C)C1=C(C2=C(C(=C1O)O)C3(CCCC(C3=C(C2=O)O)(C)C)C)O
CC(C)C1=C(C2=C(C(=C1O)OC(=O)C)[C@]3(CCCC(C3=C(C2=O)O)(C)C)C)O
C[C@@H]1CC[C@@]2([C@H]([C@H]3[C@@H](O2)CC4[C@@]3(CCC5C4CC=C6[C@@]5(CC[C@@H](C6)O[C@@H]7[C@@H]([C@H]([C@@H]([C@H](O7)CO)O[C@H]8[C@@H]([C@@H]([C@H]([C@@H](O8)C)O)O)O)O)O)C)C)C)OC1
C[C@@H]1CC[C@@]2([C@H]([C@H]3[C@@H](O2)CC4[C@@]3(CC[C@H]5[C@H]4CC=C6[C@@]5(CC[C@@H](C6)O[C@H]7[C@@H]([C@H]([C@@H]([C@H](O7)CO)O[C@H]8[C@@H]([C@@H]([C@H]([C@@H](O8)C)O)O)O)O)O[C@H]9[C@@H]([C@@H]([C@H]([C@@H](O9)C)O)O)O)C)C)C)OC1
CC(=CCC/C(=C/COC1=C(C2=C(C=C1)C=CC(=O)O2)OC)/C)C
CC(=C[C@H]1C[C@]([C@@H]2[C@H]3CC[C@@H]4[C@]5(CC[C@@H](C([C@@H]5CC[C@]4([C@]36C[C@@]2(O1)OC6)C)(C)C)O[C@H]7[C@@H]([C@H]([C@H](CO7)O[C@H]8[C@@H]([C@H]([C@@H]([C@H](O8)CO)O)O)O[C@H]9[C@@H]([C@H]([C@@H](CO9)O)O)O)O)OC(=O)C)C)(C)O)C
CC(=CC1CC(C2C3CCC4C5(CCC(C(C5CCC4(C36CC2(O1)OC6)C)(C)C)OC7C(C(C(CO7)O)OC8C(C(C(C(O8)CO)OC(=O)C)OC9C(C(C(CO9)O)O)O)O)OC(=O)C)C)(C)O)C
COC1=C(C2=C[N+]3=C(C=C2C=C1)C4=CC(=C(C=C4CC3)OC)O)OC
CC=C(C)C(=O)OC(C)(C)C1CC2=C(O1)C=CC3=C2OC(=O)C=C3
CC(C)([C@H]1CC2=C(O1)C=CC3=C2OC(=O)C=C3)O
CC(=O)OC(C)(C)[C@@H]1CC2=C(O1)C=CC3=C2OC(=O)C=C3
C[C@]12CC[C@@H]3C(=O)O[C@H](C[C@@]3(C1C4C=C[C@]2(C(=O)O4)O)C)C5=COC=C5
CC1=C2CC3C(=C)CC(CC3(CC2OC1=O)C)O
C[C@]12CC[C@H]3C(=CC(=O)[C@H]4[C@@]3(C[C@@H]([C@@H](C4)O)O)C)[C@@]1(CC[C@@H]2[C@](C)([C@@H](CCC(C)(C)O)O)O)O
C/C(=C/C[C@H]1C(=C)CCC2[C@@]1(CCC[C@]2(C)CO)C)/C=C
COC1CC23C(CCCC4=CC5=C(C=C42)OCO5)CC6C3(O6)C=C1
C[C@H]1C[C@@H]2C[C@@H]([C@H]3CCCN4[C@@]3(C1)[C@@H]2CCC4)O
COC1=CC(=C2C(=C1)OC(=C(C2=O)OC3C(C(C(C(O3)CO)O)O)O)C4=CC=C(C=C4)OC5C(C(C(C(O5)CO)O)O)O)O
CC1=C2[C@H](C([C@@]3([C@H](CC(C(=C)C3CC(C2(C)C)CC1=O)OC(=O)[C@@H](C(C4=CC=CC=C4)N(C)C)O)OC(=O)C)C)OC(=O)C)OC(=O)C
CC1C2CCC3C2(CCC4C3CC=C5C4(CCC(C5)N)C)CN1C
CCN1C[C@@]2(CCC(C34[C@H]1[C@H](CC23)[C@]5(CC([C@H]6CC4C5C6OC(=O)C)OC)O)O)COC
C[C@@H]1[C@H]([C@H](C[C@@H](O1)OC2CC[C@]3(C(C2)CC[C@@H]4C3C([C@H]([C@]5([C@@]4(CC[C@@H]5C(=O)C)O)C)OC(=O)C)OC(=O)/C=C/C6=CC=CC=C6)C)OC)O[C@H]7C[C@H]([C@@H]([C@H](O7)C)O[C@H]8[C@@H]([C@@H]([C@@H]([C@H](O8)C)O[C@H]9[C@@H]([C@H]([C@@H]([C@H](O9)CO)O)O)O)OC)O)OC
C[C@@H]1[C@H]([C@H](C[C@@H](O1)O[C@H]2CC[C@]3(C(C2)CC[C@@H]4C3C([C@H]([C@]5([C@@]4(CC[C@@H]5C(C)O)O)C)OC(=O)C)OC(=O)/C=C/C6=CC=CC=C6)C)OC)O[C@H]7C[C@@H]([C@@H]([C@H](O7)C)O[C@H]8[C@@H]([C@@H]([C@@H]([C@H](O8)C)O[C@H]9[C@@H]([C@@H]([C@@H]([C@H](O9)CO)O)O)O)OC)O)OC
CC1C2CCC3C2(CCC4C3CC=C5[C@@]4(CCC(C5)NC)C)C=N1
CC1[C@H]2CCC3[C@@]2(CCC4C3CC=C5[C@@]4(CC[C@@H](C5)N(C)C)C)CN1
CC1C2CCC3C2(CCC4C3CC=C5C4(CCC(C5)N(C)C)C)CN1C.Cl
CC1=CC[C@@H]2[C@@]([C@@H]1COC3=CC4=C(C=C3)C=CC(=O)O4)(CC[C@H](C2(C)C)O)C
CC1=CC[C@H]2[C@@]([C@@H]1COC3=CC4=C(C=C3)C=CC(=O)O4)(CCC(=O)C2(C)C)C
C[C@]12CCCC([C@@H]1CCC3=C2COC3=O)(C)C
C[C@@H]1C[C@H]2[C@H](C[C@]3([C@H]1CCC3=O)C)C(=C)C(=O)O2
CC1=CC2=C(C=C[C@@](O2)(C)CC/C=C(\C)/CCC=C(C)C)C(=C1)O
COC1=C2C=CC(=O)C=C2NC3=C1C=CO3
COC1=C(C=CC(=C1)/C=[13CH]\[13CH2]O)O[C@H]2[C@@H]([C@H]([C@@H]([C@H](O2)CO)O)O)O
COC1=C(C=CC(=C1)/C=C/[13CH]=O)O
COC1=C(C=CC(=C1)/C=C/COC(=O)C2=CC=CC=C2)O
COC1=C(C=CC(=C1)/C=C/COC(=O)/C=C/C2=CC=CC=C2)O
C/C=C(/C)\C(=O)OC/C=C/C1=CC(=C(C=C1)OC(=O)/C(=C\C)/C)OC
CCCC1CCCC[NH2+]1
CC1[C@H]2CCC3[C@@]2(CCC4C3CC=C5[C@@]4(CC[C@@H](C5)NC)C)CN1
COC1=CC(=CC2=C1OCO2)CC(=O)OC/C=C/C3=CC4=C(C(=C3)OC)OCO4
CC1C2CCC3C2(CCC4C3CC=C5C4(CC[C@@H](C5)N)C)C=N1
C/C=C\1/CN([C@H]2CC3=C([C@H](C[C@@H]1[C@]2(CO)C(=O)OC)C4=C(C=C5C(=C4)C6=C(N5)[C@@]7(C[C@H]8C[C@@H]([C@@H]7N(C8)CC6)[C@H](C)O)C(=O)OC)OC)NC9=CC=CC=C39)C
CC[C@H]1C[C@H]2C[C@@]3([C@H]1N(C2)CCC4=C3NC5=C4C=CC(=C5[C@@H]6C[C@@H]7C(CN([C@H](C7C(=O)OC)CC8=C6NC9=CC=CC=C89)C)C=C)OC)C(=O)OC
CC1C2C(CC3[C@@]2(CCC4C3CCC5[C@@]4(C(CC(C5)OC6C(C(C(C(O6)C)OC7C(C(C(C(O7)CO)O)O)O)O)O)OC8C(C(C(C(O8)C)OC9C(C(C(C(O9)C)O)O)O)O)O)C)C)O[C@@]1(CCC(=C)COC1C(C(C(C(O1)CO)O)O)O)O
CC1CCC2(C(C3C(O2)CC4C3(CCC5C4CC[C@]6(C5([C@@H](C[C@@H](C6)O[C@H]7[C@@H]([C@H]([C@@H](CO7)O)O)O)O)C)O)C)C)OC1
CC1CCC2(C(C3C(O2)CC4C3(CCC5C4CC[C@]6(C5([C@@H](C[C@@H]([C@@H]6O)O)O)C)O[C@H]7[C@@H]([C@H]([C@@H](CO7)O)O)O)C)C)OC1
C[C@H]1[C@@H]([C@H]([C@H]([C@@H](O1)O[C@@H]2[C@@H]([C@@H](O[C@H]([C@@H]2O)O[C@@H]3[C@H]([C@@H](CO[C@H]3O[C@H]4C[C@H]([C@]5(C(C4)CCC6C5CC[C@]7(C6CC8C7C(C9(O8)CCC(CO9)C)C)C)C)O)O)O)C)O)O)O)O
C[C@H]1[C@@H]([C@H]([C@H]([C@@H](O1)O[C@@H]2[C@H]([C@@H](CO[C@H]2O[C@@H]3[C@H]([C@@H](O[C@H]([C@@H]3O)OC4C[C@H]5CCC6C(C5([C@@H](C4)O[C@H]7[C@@H]([C@H]([C@@H]([C@H](O7)CO)O)O)O)C)CCC8(C6CC9C8C(C1(O9)CCC(CO1)C)C)C)C)O)O)O)O)O)O
C[C@H]1[C@@H]([C@H]([C@H]([C@@H](O1)O[C@H]2CCC3(C4CC(C5(C(CCC5(C4CCC3(C2)O)O)C6=CC(=O)OC6)C)O)C=O)O)O)O
CC1C(C(C(C(O1)OC2CCC3(C4CCC5(C(CCC5(C4CCC3(C2)O)O)C6=CC(=O)OC6)C)CO)O)O)O
CC1C(C(C(C(O1)OC2CCC3(C4CCC5(C(CCC5(C4CCC3(C2)O)O)C6=COC(=O)C6)C)C=O)O)O)OC7C(C(C(C(O7)CO)O)O)O
CC(C)C1CCC2(C3C1C2C(=C)C=C3)C
C1CC1(NC(=O)CCC(C(=O)O)N)O
C1C[N+]2=C(C=C3C=CC4=C(C3=C2)OCO4)C5=CC6=C(C=C51)OCO6
CC1=CC(=O)CC([C@@]1(/C=C/[C@H](C)O[C@H]2[C@@H]([C@H]([C@@H]([C@H](O2)CO)O)O)O)O)(C)C
CC1[C@H](C(C[C@@H](O1)O[C@H]2CC[C@@]3([C@H]4CC[C@@]5([C@H](CC[C@@]5([C@@H]4CC[C@@]3(C2)O)O)C6=CC(=O)OC6)C)C=O)O)O
CCCCC(C)CC1C(=O)OC(CC(=O)NC(C(=O)NC(C(=O)N1)C)CC2=CC=CC=C2)C(C)C
C1C(C(C(O1)N2C=NC3=C2N=CN=C3N)O)CO
COC1=C(C=C2[C@H]3CC4=CC(=C(C=C4CN3CCC2=C1)OC)O)O
CC(=C)[C@@H]1C2C[C@]3([C@@]4(CO4)[C@H]5[C@@H]([C@]3(C1C(=O)O2)O)O5)C
CC(=C)[C@@H]1[C@@H]2[C@@H]3[C@]4([C@@](CO3)([C@H]5[C@@H]([C@]4([C@H]1C(=O)O2)O)O5)O)C
C1[C@@H]2[C@H]([C@@H]([C@H]([C@@H](O2)OC(=O)C3=CC(=C(C(=C3)OC4=C(C(=C(C=C4C(=O)O[C@@H]5[C@@H]([C@H]([C@H]6[C@H](O5)COC(=O)C7=CC(=C(C(=C7C8=C(C(=C(C=C8C(=O)O6)O)O)O)O)O)O)OC(=O)C9=CC(=C(C(=C9)O)O)O)OC(=O)C2=CC(=C(C(=C2)O)O)O)O)O)O)O)O)OC(=O)C2=CC(=C(C(=C2)O)O)O)OC(=O)C2=CC(=C(C(=C2)O)O)O)OC(=O)C2=CC(=C(C(=C2C2=C(C(=C(C=C2C(=O)O1)O)O)O)O)O)O
C1C2C(=C(C(=C1O)O)O)C3=C(C(=C(CC3C(=O)OC4C(C(COC2=O)OC(C4O)OC(=O)C5=CC(=C(C(=C5)O)O)O)O)O)O)O
C(C(C(C(C(=O)C(CO)O)O)O)O)O
CN1CCC2=CC(=C(C=C2[C@H]1[C@H]3C4=C(C5=C(C=C4)OCO5)C(=O)O3)OC)OC
CC(=O)NC1CCC2=CC3=C(C(=C2C4=CC=C(C(=O)C=C14)OC)OC)OCO3
CC1CC(=O)C2C1C(OC=C2C(=O)OC)OC3C(C(C(C(O3)CO)O)O)O
CCCCCCCCCCC[C@H](CC1=CC(=O)C=C(C1=O)OC)OC(=O)C
C[C@H]1[C@H](CC2C1C(OC=C2C(=O)OC)O[C@H]3[C@@H]([C@H]([C@@H]([C@H](O3)CO[C@H]4CC5C(C(O4)C)C(OC=C5C(=O)OC)O[C@H]6[C@@H]([C@H]([C@@H]([C@H](O6)CO)O)O)O)O)O)O)O
C1[C@H]([C@@H](OC(=O)C2=CC(=C(C(=C2C3=C(C(=C(C=C3C(=O)O1)O)O)O)O)O)O)[C@@H]([C@H](C=O)OC(=O)C4=CC(=C(C(=C4OC5=C(C(=C6C(=C5)C(=O)OC[C@H]([C@@H](OC(=O)C7=CC(=C(C(=C76)O)O)O)[C@@H]([C@H](C=O)OC(=O)C8=CC(=C(C(=C8)O)O)O)OC(=O)C9=CC(=C(C(=C9)O)O)O)O)O)O)O)O)O)OC(=O)C1=CC(=C(C(=C1)O)O)O)O
C1C(C(OC(=O)C2=CC(=C(C(=C2C3=C(C(=C(C=C3C(=O)O1)O)O)O)O)O)O)C(C(C=O)OC(=O)C4=CC(=C(C(=C4OC5=C(C6=C7C(=C5)C(=O)OC8=C7C(=CC(=C8O)O)C(=O)O6)O)O)O)O)OC(=O)C9=CC(=C(C(=C9)O)O)O)O
C[C@]12CC[C@H]3[C@H]([C@]1(CC[C@@H]2C4=CC(=O)OC4)O)CC[C@H]5[C@@]3(CC[C@@H](C5)O)CO
C(C[N+](=O)[O-])C(=O)OC[C@@H]1[C@H]([C@@H]([C@H]([C@H](O1)O)OC(=O)CC[N+](=O)[O-])O)O
CC[C@H]1C[C@@H]2C[C@]3([C@H]1N(C2)CCC4=C3NC5=CC=CC=C45)C(=O)OC
C[C@]12CCCC([C@@H]1C[C@@H](C(=C)[C@@H]2/C=C/C3=COC=C3)O)(C)C
CC1(CCCC2(C1CCC(=C)C2C3C=CC(C(OO3)O)C=O)C)C
C[C@]12CCCC([C@@H]1CCC(=C)[C@@H]2CCC3=CC(OC3=O)O)(C)C
C[C@]12CCCC([C@@H]1CCC(=C)[C@@H]2C/C=C\3/CC(OC3=O)O)(C)C
C[C@]12CCCC([C@@H]1CCC(=C)[C@@H]2C/C=C\3/CC(OC3=O)OC)(C)C
CC1CCC2C(C3(C1(CCC3=O)O)C)OC(=O)C2=C
CCCCCCCCCCCC[C@H]([C@H]1CC[C@@H](O1)[C@@H](CCCC[C@@H](CCCCCCCC2=C[C@@H](OC2=O)C)O)O)O
CCCCCCCCCCCC[C@H]([C@H]1CC[C@H](O1)[C@H](CCCCC(=O)CCCCCCCC2=C[C@@H](OC2=O)C)O)O
C[C@]12CCC3C(C1(CCC2C4=CC(=O)OC4)O)CCC5[C@@]3(CC[C@@H](C5)O)C=O
C[C@]12CCC(=O)C=C1CC[C@@H]3C2[C@H](C[C@]4([C@H]3CC[C@@H]4C(=O)CO)C)O
C[C@]12CCC(=O)C=C1CC[C@H]3[C@@H]2C(=O)C[C@@]4([C@@H]3CC[C@@]4(C(=O)CO)O)C
CC1C2=C(CN(CCC3=CC4=C(C=C3C1=O)OCO4)C)C5=C(C=C2)OCO5
CC1C2C3=CC(=C(C=C3CCN2CC4=C1C=CC(=C4OC)OC)OC)OC
COC1=C(C=C2C3CC4=C(CN3CCC2=C1)C(=C(C=C4)O)OC)OC
CNCCC1=CC2=C(C=C1C3=NC=C4C(=C3)C=CC5=C4OCO5)OCO2
CN1CCC2=CC(=C(C3=C2C1CC4=C3C(=C(C=C4)OC)OC)O)OC
CC1(C(C(C2=C(O1)C=C3C(=C2)C4=C(C5=C(O4)C=C(C=C5)O)C(=O)O3)O)O)C
CC(=CCC1=C(C=CC(=C1O)C(=O)/C=C/C2=CC=C(C=C2)O)O)C
CC(=CCC1=C(C=CC(=C1)C2=COC3=CC(=CC(=C3C2=O)O)O)O)C
C1=CC(=C(C=C1C2=COC3=C(C2=O)C=CC(=C3)O)C=O)O
CCCCC/C=C\C=C/C(=O)OC1CC2C(C(CC(C23C(OC(C3=C1)OC(=O)C)OC(=O)C)O)C)(C)CCC(=C)C=C
CCCCCCCCCC(=O)OC1CC(C(C2C13C(OC(C3=CC(C2)O)OC(=O)C)OC(=O)C)(C)CCC(=C)C=C)C
CO/C=C(/[C@H]1C[C@H]2C3=C(CCN2C[C@@H]1C=C)C4=CC=CC=C4N3)\C(=O)OC
CC(=O)O[C@@H]1C(CC[C@@H]2C1CC3C4=C(CCN3C2)C5=CC=CC=C5N4)O
[2H]C1C(C2(C(C3=CC4=C(C=C13)OCO4)N(C(C5=C2C=CC6=C5OCO6)([2H])[2H])C)C)O
C[C@@]12[C@H]3C4=CC5=C(C=C4CC1OC(N3C)C6=C2C=CC7=C6OCO7)OCO5
CO/C=C(\[C@H]1C[C@H]2[C@@]3(CCN2C[C@@H]1C=C)C4=CC=CC=C4NC3=O)/C(=O)OC
CC[C@@H]1CN2CC[C@@]3([C@@H]2C[C@@H]1/C(=C\OC)/C(=O)OC)C4=CC=CC=C4NC3=O
CC[C@@H]1CN2CC[C@]3([C@@H]2C[C@@H]1/C(=C/OC)/C(=O)OC)C4=CC=CC=C4NC3=O
CN1CCC2=CC(=C(C=C2C1)O)OC
COC1=C(CC2=CN3C4C=C(C(=CC4CC=C3C=C2C1)O)OC)OC
CN1CCC2=CC(=C(C3=C2C1CC4=C3C(=C(C=C4)OC)O)O)OC
C[C@@H]1C[C@@H]2[C@@H](CC3=CNC4=CC=CC2=C34)N(C1)C
CC12CCCC(=C)[C@H]1C[C@@H](CC2)C(=C)CO
CC1=CCC/C(=C/[C@@H]2[C@@H](CC1)C(=C)C(=O)O2)/C
C[N+]1=CC2=C(C3=C(C=C2CC1)OCO3)OC.[OH-]
CC(=C)C(C(C1=C(C=C2C(=C1)C=CC(=O)O2)OC)O)O
C1=CC=C2C(=C1)C=CO2
COC(=O)C1=CO[C@H]([C@H]2[C@@H]1CC=C2CO)O[C@H]3[C@@H]([C@H]([C@@H]([C@H](O3)CO[C@H]4[C@@H]([C@H]([C@@H]([C@H](O4)COC(=O)/C=C\C5=CC=C(C=C5)O)O)O)O)O)O)O
CC1(CCC2(CCC3(C(=CCC4C3(CCC5C4(CCC(C5(C)CO)OC(=O)C=CC6=CC=C(C=C6)O)C)C)C2C1)C)C(=O)O)C
CC1(CCC2(CCC3(C(=CCC4C3(CCC5C4(CCC(C5(C)COC(=O)C=CC6=CC=C(C=C6)O)O)C)C)C2C1)C)C(=O)O)C
C[C@]12CC[C@@H]([C@@]([C@@H]1CC[C@@]3([C@@H]2CC=C4[C@]3(CC[C@@]5([C@@H]4CC(CC5)(C)C)C(=O)O)C)C)(C)COC(=O)/C=C\C6=CC=C(C=C6)O)O
CC1=CC2=C(C(=O)C=C(O2)C3=CC=C(C=C3)O)C(=C1[C@H]4[C@@H]([C@H]([C@@H]([C@H](O4)CO)O)O)O[C@H]5[C@@H]([C@H]([C@@H]([C@H](O5)COC(=O)/C=C/C6=CC(=C(C=C6)O)OC)O)O)O)O
C1=CC2=C(C=C1O)OC3=C2C(=O)OC4=C3C=CC(=C4)O
CC\1C2C(CC/C1=C/OC(=O)CCNC)[C@]3(CC[C@@H](C(C3CC2=O)(C)C)OC(=O)CC(C)(C)O)C
CC\1[C@H]2C(CC/C1=C/OC(=O)CCN(C)C)[C@]3(CC[C@@H](C(C3CC2=O)(C)C)OC(=O)CC(C)(C)O)C
CC(=CCC1=C(C=C(C2=C1OC(=O)C=C2)OC)OC)C
CC(=CCC/C(=C/CC1=C2C(=CC(=C1OC)O)OC3=CC(=C(C(=C3C2=O)O)CC=C(C)C)O)/C)C
CC(=CCC/C(=C/CC1=C2C(=CC(=C1OC)O)OC3=CC(=C(C(=C3C2=O)O)C/C=C(/C)\CO)O)/C)C
CC(=CCC/C(=C/CC1=C(C=C2C(=C1O)C(=O)C3=CC(=C(C=C3O2)O)OC)O)/C)C
CCN1C[C@@]2([C@@H](C[C@@H]([C@@]34[C@@H]2[C@H]([C@@H](C31)[C@]5(C[C@@H]([C@]6(C[C@@H]4[C@@H]5[C@H]6OC(=O)C7=CC=C(C=C7)OC)O)OC)OC(=O)C)OC)OC)O)COC
CC(=C)C1CC2=C(C(=C(C=C2O1)OC)C(=O)/C=C/C3=CC=CC=C3)O
CC1[C@@H](C([C@@H]([C@@H](O1)OC2=CC(=C3C(=C2)OC(=C(C3=O)O[C@H]4[C@H](C([C@H](C(O4)C)O)OC(=O)C)OC(=O)C)C5=CC=C(C=C5)O)O)O)O)O
C[N+](=C(N)N)CC(=O)[O-]
CN1CC(=O)N=C1N.CN1CC(=O)N=C1N.Cl[Zn]Cl
C[C@H]1[C@@H]([C@H]([C@H]([C@@H](O1)O[C@@H]2[C@@H]3[C@H](OC[C@@H](O3)C4=CC(=C(C=C4)O)O)O[C@@H]([C@H]2OC(=O)/C=C/C5=CC(=C(C=C5)O)O)CO)O)O)O
CC(C)(C=C)O[C@H]1[C@@H]([C@H]([C@@H]([C@H](O1)CO)O)O)O
CC1=CC=C(C=C1)O
CC1=CC=CC=C1O
COC1=C2CN3CCC4(C3CC(C5C4O5)O)C2=CC6=C1OCO6
CO[C@@H]1C[C@H]2[C@]3(C=C1)[C@H](CN2CC4=CC5=C(C=C34)OCO5)O
C1OC2=C(O1)C=C3C(=C2)C4=CC=CC=C4NC3=O
C1C(OC2=C(O1)C=C3C4=CC=CC=C4NC(=O)C3=C2)CC5=CC=C(C=C5)O
C1CN2CC3=CC4=C(C=C3[C@]15[C@H]2C[C@@H](C=C5)O)OCO4
CCN1C[C@@]2([C@@H](CC(C34C2CC(C31)[C@]5(C[C@@H](C6CC4C5C6O)OC)OC)O)O)C
CC(=CCC1=C(C=CC2=C1OC3C2(COC4=C3C=CC(=C4)O)O)OC)C
C/C(=C\C=C\C=C(\C=C\C=C(\C(=O)OC)/C)/C)/C=C/C=C(/C(=O)OC)\C
C/C(=C\C=C\C=C(/C)\C=C\C=C(/C)\C(=O)OC1[C@@H]([C@H]([C@@H]([C@H](O1)CO[C@H]2[C@@H]([C@H]([C@@H]([C@H](O2)CO)O)O)O)O)O)O)/C=C/C=C(\C)/C(=O)O[C@H]3[C@@H]([C@H]([C@@H]([C@H](O3)CO[C@H]4[C@@H]([C@H]([C@@H]([C@H](O4)CO)O)O)O)O)O)O
CC1=C(C(C[C@H](C1)O)(C)C)[C@H](CC(=O)O)O
C[C@@H](C1CCC2[C@@]1(CCC3[C@H]2CC=C4[C@@]3(CCC(C4)NC)C)C)N(C)C
C/C=C\1/C[C@H]([C@@](C(=O)OCC2=CCN3[C@H]2[C@@H]([C@@H](C3)O)OC1=O)(C)O)C
C1=NC2=C(NC(=O)N=C2N1[C@H]3[C@H]([C@@H]([C@@H](O3)CO)O)O)N
CC1CCC2([C@@H]([C@@]13CC(OC3=O)C4=COC=C4)C=CC=C2C(=O)OC)C(=O)OC
C[C@@H]1CC[C@@]2([C@@H]([C@]1(CCC3=COC=C3)C(=O)OC)C=CC=C2C(=O)OC)C(=O)OC
CC1CCC23[C@@H]([C@@]14CC(OC4=O)C5=COC=C5)[C@@H](CC=C2C(=O)OC)OC3=O
COC1=C(C=CC2=C1OCO2)CC=C
CN1C2CC3=CC4=C(C=C3C1CC5=CC6=C(C=C25)OCO6)OCO4
[H+].C[C@H](CCC(=O)[C@@H](C)C1C(=O)C[C@@H]2[C@@]1(CC[C@H]3[C@H]2CC=C4[C@@]3(CC[C@@H](C4)O)C)C)CO
CC(C)C1=C(C(=C2C(=C1)C(=O)C[C@@H]3[C@@]2(CCCC3(C)C)C)O)OC
CN1C2=CC=CC=C2C(=O)C3=C1C4=CC=CC=C4N3
C[C@]12CCC[C@@]([C@@H]1CC(CC2)C(C)(C)O)(C)O
COC1=CC=C(C=C1)C2=CC(=O)C3=C(C(=C(C=C3O2)O)OC4=CC=C(C=C4)C5=CC(=O)C6=C(C=C(C=C6O5)O)O)O
COC1=CC=C(C=C1)C2=CC(=O)C3=C(C(=C(C=C3O2)OC)OC4=CC=C(C=C4)C5=CC(=O)C6=C(C=C(C=C6O5)O)O)O
CC1=CC[C@H](CC1=O)C(=C)CCC=C(C)C
CC(C)C1CCC(=O)C=C1
COC1=C(C=C2C(=C1)CCNCC3=C(CC2=O)C=CC4=C3OCO4)OC
CC(C)C1=CC(=O)C2=C(C1=O)C(=O)C[C@@H]3[C@@]2(CCCC3(C)C)C
C[C@H]1COC2C1C(=O)C(=O)C3=C2C=CC4=C3CCCC4(C)C
C[C@H]1CCC2(C(C3C(O2)CC4[C@@]3(CCC5C4CC=C6[C@@]5([C@@H](C[C@@H](C6)O)O[C@H]7[C@@H]([C@H]([C@@H]([C@H](O7)CO)O)O[C@H]8[C@@H]([C@@H]([C@H]([C@@H](O8)C)O)O[C@H]9[C@@H]([C@H]([C@@H]([C@H](O9)CO)O)O)O)O[C@@H]2[C@@H]([C@H]([C@@H](CO2)O)O)O)O)C)C)C)OC1
C[C@@H]1CCC2(C(C3C(O2)CC4[C@@]3(CCC5C4CC[C@@]6([C@@]5(CC[C@@H](C6)O[C@H]7[C@@H]([C@H]([C@@H]([C@H](O7)CO)O)O[C@H]8[C@@H]([C@H]([C@@H]([C@H](O8)CO)O)O)O[C@H]9[C@@H]([C@@H]([C@H]([C@@H](O9)C)O)O)O)O)C)C)C)C)OC1
C[C@H]1CCC2([C@H](C3C(O2)CC4[C@@]3(CCC5C4CC=C6[C@@]5([C@@H](C[C@@H](C6)O)O[C@H]7[C@@H]([C@H]([C@@H]([C@H](O7)CO)O)O)O[C@H]8[C@@H]([C@H]([C@@H]([C@H](O8)CO)O)O[C@@H]9[C@@H]([C@H]([C@@H](CO9)O)O)O)O)C)C)C)OC1
C[C@H]1CCC2(C(C3C(O2)CC4[C@@]3(CCC5C4CC=C6[C@@]5([C@@H](C[C@@H](C6)O)O[C@H]7[C@@H]([C@H]([C@@H]([C@H](O7)CO)O)O[C@H]8[C@@H]([C@@H]([C@H]([C@@H](O8)C)O)O[C@H]9[C@@H]([C@H]([C@@H]([C@H](O9)CO)O)O)O)O)O)C)C)C)OC1
C[C@@H](CC/C=C(\C)/C(=O)O)[C@H]1CC[C@@]2([C@@]1(CC[C@@]3([C@H]2CC=C4[C@H]3CCC(C4(C)C)O)C)C)C
C[C@@H](CC/C=C(\C)/C(=O)O)[C@H]1CC[C@@]2([C@@]1(CC[C@@]3([C@H]2CCC(=C(C)C)[C@H]3CCC(=O)O)C)C)C
CC1CCC(C2C13C2C(CC3)(C)O)C(C)C
C1[C@@H]([C@H](C(O1)O)CC2=CC3=C(C=C2)OCO3)CC4=CC5=C(C=C4)OCO5
C1[C@H]([C@@H]([C@H]([C@@H](O1)OC[C@@H]2[C@H]([C@@H]([C@H]([C@@H](O2)OCCC3=CC=C(C=C3)O)O)O)O)O)O)O
CC(C1=CC=C(C=C1)O)C2=C(C3=C(C(=C2O)[C@H]4C([C@H]([C@@H](C(O4)CO)O)O)O)OC(=CC3=O)C5=CC=C(C=C5)O)O
CC(C1=CC=C(C=C1)O)C2=C(C(=C(C3=C2OC(=CC3=O)C4=CC=C(C=C4)O)O)[C@H]5C([C@H]([C@@H](C(O5)CO)O)O)O)O
CC(=O)OC(C)(C)/C=C/C(=O)[C@@](C)(C1[C@@H](C[C@@]2([C@@]1(CC(=O)[C@@]3(C2CC=C4[C@H]3C[C@@H](C(=O)C4(C)C)O)CO)C)C)O)O
CC(=O)OC(C)(C)/C=C/C(=O)[C@@](C)(C1[C@@H](C[C@@]2([C@@]1(CC(=O)[C@@]3(C2CC=C4[C@H]3C[C@@H](C(=O)C4(C)C)O)C)C)C)O)O
CC(=O)OC(C)(C)/C=C/C(=O)C(C)(C1[C@@H](CC2(C1(CC(=O)C3(C2CC=C4[C@H]3CC[C@@H](C4(C)C)O)CO)C)C)O)O
C[C@]12C[C@@H](C([C@@]1(CC(=O)[C@]3(C2CC=C4C3C[C@H](C(=O)C4(C)C)O)C)C)[C@@](C)(C(=O)/C=C/C(C)(C)O)O)O
CC(=O)OC(C)(C)/C=C/C(=O)[C@@](C)(C1[C@@H](C[C@@]2([C@@]1(CC(=O)[C@@]3(C2CC=C4C3C=C(C(=O)C4(C)C)[O-])C)C)C)O)O
C[C@@]12C[C@H](C([C@]1(CC(=O)[C@@]3([C@H]2CC=C4[C@H]3C[C@@H]([C@H](C4(C)C)O)O)C)C)C(C)(C(=O)/C=C/C(C)(C)O)O)O
C[C@@]12C[C@H]([C@@H]([C@]1(CC(=O)[C@@]3([C@H]2CC=C4[C@H]3C[C@@H](C(=O)C4(C)C)O)C)C)[C@](C)(C(=O)CC(C(C)(C)O)O)O)O
C[C@@]12C[C@H]([C@@H]([C@]1(CC(=O)[C@@]3([C@H]2CC=C4[C@H]3C=C(C(=O)C4(C)C)[O-])C)C)[C@](C)(C(=O)/C=C/C(C)(C)O)O)O
C[C@@]12C[C@H]([C@@H]([C@]1(CC(=O)[C@@]3([C@H]2CC=C4[C@H]3C=C(C(=O)C4(C)C)O)C)C)[C@](C)(C(=O)CC(C(C)(C)O)O)O)O
C[C@@]12C[C@H]([C@@H]([C@]1(CC(=O)[C@@]3([C@H]2CC=C4[C@H]3C=C(C(=O)C4(C)C)O)C)C)[C@](C)(C(=O)CCC(C)(C)O)O)O
CC1(C2=CCC3C4(CC(C(C4(CC(=O)C3(C2CC(C1=O)O)C)C)C(C)(C(=O)CCC(C)(C)O)O)O)C)C
C1CNC[C@@]1(C(=O)O)N
CC(=CCC1=C(C=C2C(=C1O)C(=O)CC(O2)C3=C(C=C(C=C3)O)O)O)C
CC(=CCC1=C(C=CC=C1O)C(=O)C2=C(C=C(C=C2O)OC)O)C
CC(=CCC1=C(C=CC=C1O)C(=O)C2=C(C=C3C(=C2)C=CC(O3)(C)C)O)C
CC(=CCC1=C(C=C(C(=C1)C(=O)C2=C(C(=CC=C2)O)CC=C(C)C)O)O)C
CC(=CCC1=C(C=C(C=C1C(=O)C2=C(C=C(C3=C2OC(C=C3)(C)C)O)O)O)O)C
CC(=CCC1=C(C=CC=C1O)C(=O)C2=C(C(=C(C=C2O)O)CC=C(C)C)O)C
CC(C)(C=C)C1=C(C=C2C(=C1O)C(=O)C3=C(O2)C(=C(C=C3)O)O)O
CN1CCC2=C3[C@@H]1CC4=CC5=C(C=C4OC3=C(C=C2)O)OCO5
CN1CCC2=C3C1CC4=CC(=C(C=C4OC3=C(C=C2)O)OC)OC
COC1=C2C3=C(CCN[C@H]3CC4=CC(=C(C=C4O2)OC)OC)C=C1
CN1CCC2=C3C1CC4=CC(=C(C=C4OC3=C(C=C2)OC)OC)OC
CC(C)C1=CC=C(C=C1)C=O
CC1=CC[C@@H]2C1[C@@H]3[C@@H]([C@H](C[C@@]2(C)O)O)C(=C)C(=O)O3
CC1=CC[C@H]2[C@@H]1[C@H]3C(=C(C(=O)O3)C)CC[C@]2(C)O[C@@H]4[C@@H]([C@@H]([C@@H]([C@H](O4)CO)O)O)O
CCCC=C=C=C1C=CC(=O)O1
CC(C)C1=CC=CC=C1C2=CC=C(C=C2)O
CC1=CC=C(C=C1)[C@]2(CCCC2(C)C)C
C=C[C@H]1CN2CCC1C[C@H]2[C@@H](C3=C4C=C(C=CC4=NC=C3)O)O
C/C=C/1\C[N+]2(CCC34C2CC1C5=CN6C7=CC=CC=C7C89C61C(=CN(C53O1)C1=CC=CC=C41)C\1CC8[N+](CC9)(C/C1=C/C)C)C
CC1=C2C(=O)C3=C(CC2(C(CC1)O)C)OC=C3C
CC1=C(C(=CC(=C1Cl)OC)OC2C(C(C(C(O2)COC3C(C(CO3)(CO)O)O)O)O)O)Cl
CC1=C(C(=C(C(=C1Cl)OC)Cl)O[C@H]2[C@@H]([C@H]([C@@H]([C@H](O2)CO[C@H]3[C@@H]([C@H]([C@@H](CO3)O)O)O)O)O)O)Cl
C[C@H]1[C@H]([C@H]([C@H]([C@@H](O1)O[C@@H]2[C@H]([C@@H]([C@H](O[C@H]2O[C@H]3CC[C@]45C[C@@]46C(CCC5C3(C)C)C7(C[C@@H](C([C@]7(CC6O)C)C(C)CCC(=O)C(C)C)O)C)CO)O)O)O)O)O
CCC1=C(C=CC(=C1)O)OC2C(C(C(C(O2)CO)O)O)O.COC1=CC(=CC=C1)OC
COC1=CC=CC(=C1C(=O)OCC2=C(C=CC(=C2)O)O[C@H]3[C@@H]([C@H]([C@@H]([C@H](O3)CO)O)O)O)O
CC(C)C1=CCC(C2CCC(C2C1)(C)O)(C)O
CC1=CC=C(C=C1)[C@]2(CCCC(O2)(C)C)C
C[C@@H]1CC[C@@H]2[C@]13CC(=C(C)C)[C@](O3)(C=C2C)O
CC(=C1CC2[C@H]([C@@]2(CC1=O)C)CCC(=O)C)C
CC1=C(C=C(C=C1)/C=C/C(=O)CC(=O)/C=C/C2=CC(=C(C=C2)O)OC)OC
C[C@H]1CC[C@@H]2[C@]13C[C@@H](C(O3)(CC2=C)O)C(C)C
C[C@H]1CC/C=C(/CC(=O)[C@H](CC1=O)C(C)C)\C
CC(CC(=O)OC1=C(C(=C(C(=C1OC(=O)C)C2=CC=C(C=C2)O)OC(=O)CC(C)O)OC(=O)CCC3=CC=CC=C3)C4=CC=C(C=C4)O)O
CC(CC(=O)OC1=C(C(=C(C(=C1C2=CC=C(C=C2)O)O)OC(=O)CC(C)OC(=O)C)C3=CC=C(C=C3)O)O)O
CC(CC(=O)OC1=C(C(=C(C(=C1O)C2=CC=C(C=C2)O)OC(=O)CCC3=CC=CC=C3)O)C4=CC=C(C=C4)O)OC(=O)C
CC(CC(=O)OC1=C(C(=C(C(=C1O)C2=CC=C(C=C2)O)OC(=O)CCC3=CC=CC=C3)O)C4=CC=C(C=C4)O)O
CC(CC(=O)OC1=C(C(=C(C(=C1O)C2=CC=C(C=C2)O)OC(=O)C)O)C3=CC=C(C=C3)O)O
CC(CC(=O)OC1=C(C(=C(C(=C1C2=CC=C(C=C2)O)O)OC(=O)CC(C)OC(=O)C)C3=CC=C(C=C3)O)O)OC(=O)C
CC(CC(=O)OC1=C(C(=C(C(=C1O)C2=CC=C(C=C2)O)OC(=O)C)O)C3=CC=C(C=C3)O)OC(=O)C
CCCC(=O)OC1=C(C(=C(C(=C1O)C2=CC=C(C=C2)O)OC(=O)C)O)C3=CC=C(C=C3)O
CC(=O)OC1=C(C(=C(C(=C1C2=CC=C(C=C2)O)O)OC(=O)CCC3=CC=CC=C3)C4=CC=C(C=C4)O)O
C[C@@H]1CCCCCC(=O)C2=C(C=C(C=C2CC(=O)O1)O)O
CC1=COC2=C1CC([C@](C2)(C)C=C)C(=C)C
CC1=COC2=C1C(=O)[C@H]([C@](C2)(C)C=C)C(=C)C
CN1CCC[C@@H]1CC(=O)C[C@H]2CCCN2C
COC1=CC(=NC2=CC=CC=C21)CCC3=CC4=C(C=C3)OCO4
C1=CC(=C(C=C1C2=C(C=C3C(=CC(=O)C=C3O2)O)O)O)[O-]
C1=CC(=C(C=C1C2=C(C=C3C(=CC(=CC3=[O+]2)O)O)O[C@H]4[C@@H]([C@H]([C@@H]([C@H](O4)CO[C@H]5[C@@H]([C@H]([C@@H]([C@H](O5)CO)O)O)O)O)O)O)O)O
C[C@H]1[C@@H]([C@H]([C@H]([C@@H](O1)OC[C@@H]2[C@H]([C@@H]([C@H]([C@@H](O2)OC3=C([O+]=C4C=C(C=C(C4=C3)O)O)C5=CC(=C(C=C5)O)O)O)O)O)O)O)O
C[C@H]1[C@@H]([C@H]([C@H]([C@@H](O1)OC[C@@H]2[C@H]([C@@H]([C@H]([C@@H](O2)OC3=C([O+]=C4C=C(C=C(C4=C3)O[C@@H]5C[C@@H]([C@@H]([C@@H]([C@H]5O)O)O)CO)O)C6=CC(=C(C=C6)O)O)O)O)O)O)O)O
C1[C@@H]([C@H]([C@@H]([C@H]([C@@H]1OC2=CC(=CC3=[O+]C(=C(C=C23)O[C@H]4[C@H]([C@@H]([C@H]([C@@H](O4)CO)O)O)O[C@@H]5[C@H]([C@@H]([C@H]([C@@H](O5)CO)O)O)O)C6=CC(=C(C=C6)O)O)O)O)O)O)CO
C1[C@H]([C@@H]([C@H]([C@@H](O1)OC[C@@H]2[C@H]([C@@H]([C@H]([C@@H](O2)OC3=C([O+]=C4C=C(C=C(C4=C3)O)O)C5=CC(=C(C=C5)O)O)O)O)O)O)O)O
C1=CC(=C(C=C1C2=C(C=C3C(=CC(=CC3=[O+]2)O)O[C@H]4C([C@H]([C@@H](C(O4)CO)O)O)O)O[C@H]5C(C([C@@H](C(O5)CO)O)O)O)O)O
C(C(=CC#N)CO)O
C=C(CO)C(C#N)O
C[C@H]1[C@@H]([C@H](OC1=O)C)C[C@H]([C@@](C)(C2CC[C@@]3([C@@]2(CCC4C3=CC(=O)[C@H]5[C@@]4(C[C@@H]([C@@H](C5)O)O)C)C)O)O)O
C/[N+](=N/COC1C(C(C(C(O1)CO)O)O)O)/[O-]
C[C@@]1(CC[C@@]23CO[C@]4([C@@H]2C1)CC[C@@H]5[C@]6(CC[C@@H](C([C@@H]6CC[C@]5([C@@]4(C[C@H]3O)C)C)(C)C)O[C@H]7[C@@H]([C@H]([C@H](CO7)O[C@H]8[C@@H]([C@H]([C@@H]([C@H](O8)CO)O)O[C@H]9[C@@H]([C@H]([C@@H]([C@H](O9)CO)O)O)O)O[C@H]1[C@@H]([C@H]([C@@H](CO1)O)O)O)O)O[C@H]1[C@@H]([C@H]([C@@H]([C@H](O1)CO)O)O)O)C)C=O
C[C@@]1(CC[C@@]23CO[C@]4([C@@H]2C1)CC[C@@H]5[C@]6(CC[C@@H](C([C@@H]6CC[C@]5([C@@]4(C[C@H]3O)C)C)(C)C)O[C@H]7[C@@H]([C@H]([C@H](CO7)O[C@H]8[C@@H]([C@H]([C@@H]([C@H](O8)CO)O)O)O)O)O[C@H]9[C@@H]([C@H]([C@@H]([C@H](O9)CO)O)O)O)C)C=O
C[N@@+]12CCC3=CC(=C(C=C3[C@@H]1CC4=C(C2)C(=C(C=C4)OC)O)O)OC
CN1CCC2=CC(=C3C(=C2C1CC4=CC=C(C=C4)OC5=C6C(CC7=CC=C(CO3)C=C7)N(CCC6=CC(=C5OC)OC)C)O)OC
CN1CCC2=CC(=C(C3=C2[C@H]1CC4=CC=C(C=C4)OC5=C6[C@@H](CC7=CC(=CC=C7)O3)N(CCC6=CC(=C5OC)OC)C)OC)OC
C[C@H](CCCC(C)C)[C@H]1CC[C@@]2([C@@]1(CC[C@]34C2CC[C@@H]5[C@]3(C4)CC[C@@H](C5(C)C)O)C)C
CC[C@@]12CC[C@@]3(C(CCC3([C@@H]1CCC4C2CC[C@@H](C4(C)C)OC(=O)C)C)C(C)CCCC(C)C)C
CC[C@@]12CC[C@@]3(C(CCC3(C1CCC4C2CC[C@@H](C4(C)C)OC(=O)/C=C/C5=CC(=C(C=C5)O)OC)C)C(C)CCCC(C)C)C
C[C@H](CCC=C(C)C)[C@H]1CC[C@@]2([C@@]1(CCC34[C@H]2CCC5[C@]3(C4)CC[C@@H](C5(C)C)O)C)C
C[C@H](CCC=C(C)C)[C@H]1CC[C@@]2([C@@]1(CC[C@]34[C@H]2CC[C@@H]5[C@]3(C4)CCC(=O)C5(C)C)C)C
CC[C@@]12CC[C@@]3(C(CCC3(C1CCC4C2CC[C@@H](C4(C)C)OC(=O)/C=C/C5=CC(=C(C=C5)O)OC)C)C(C)CCC=C(C)C)C
C[C@]12CCC34C[C@@]35CC[C@@H](C([C@@H]5[C@H](C[C@H]4[C@@]1(C[C@@H]([C@@H]2[C@@]6(CC[C@@H](O6)C(C)(C)O)C)O)C)O)(C)C)O
C[C@@H]([C@H]1[C@@H](C[C@@]2([C@@]1(CC[C@]34[C@H]2CC[C@@H]5[C@]3(C4)CC[C@@H](C5=C)NC)C)C)O)NC
C[C@H]1[C@@H]([C@@H]([C@H]([C@@H](O1)O[C@H]2CC3C(C(CC4[C@@]3(CCC(C4(C)C)O[C@H]5[C@@H]([C@H]([C@@H](O5)COC(=O)C)O)O)C)C)[C@@]6(C2C(CC6)[C@@]7(CCC(O7)C(C)(C)O)C)C)O)O)O
C[C@@H]1[C@H]([C@@H]([C@H](C(O1)OC2CC3[C@]4(CC[C@@H](C(C4CC[C@]3(C5(C2C(CC5)C6(CCC(O6)C(C)(C)O)C)C)C)(C)C)O[C@H]7[C@@H]([C@H]([C@@H](O7)CO)O)O)C)O)O)O
CN1[C@@H]2[C@@H]([C@H](C1=O)O[C@H]2C3=CC=CC=C3)C4=CC=CC=C4
C1CCCCCC(=O)CCCCC1
C[C@@H]1[C@H](CCC23C1CCC4C2(C3)CC[C@]5([C@]4(CCC5[C@H](C)CCC(=C)C(C)C)C)C)O
C[C@@H]1[C@@H]([C@H]([C@H]([C@@H](O1)OC[C@@H]2[C@@H]([C@@H]([C@H]([C@@H](O2)O[C@H]3C[C@]4([C@@H]5CC[C@H]6[C@@]([C@H](CC[C@]67[C@]5(C7)CC[C@@]4([C@H]3[C@H](C)CC[C@@H](C(C)(C)O)O)C)O[C@H]8[C@@H]([C@@H]([C@@H](CO8)O)O)O)(C)CO)C)O)O)O)O)O)O
CC(=CCC1=C2C(=C(C3=C1OC4=C(C3=O)C(OC5=CC(=C(C=C54)O)O)C=C(C)C)O)C=CC(O2)(C)C)C
CCCCCCCCC(C)C1CCCCC1
CCCCCCCCCC(CC)C1CCCCC1
C1CCC(CC1)C2=CC=C(C=C2)OCCO
CC[C@@]12C=C[C@@]3([C@H](C(CC3([C@@H]1CCC4C2CCC(C4(C)C)N(C)C)C)O)[C@H](C)NC)C
C[C@H](CC[C@@H](C)C(=C)C)[C@H]1CC[C@@]2([C@@]1(CC[C@]34[C@H]2CC[C@@H]5[C@]3(C4)CC[C@@H](C5(C)C)O)C)C
CC[C@@]12CC[C@@]3([C@H](CCC3([C@@H]1CCC4C2CCC(=O)C4(C)C)C)C(C)CCC(C)C(=C)C)C
CC(C)C[C@H]1C(=O)N[C@H](C(=O)N2CCC[C@H]2C(=O)N[C@H](C(=O)N[C@H](C(=O)N[C@H](C(=O)N[C@H](C(=O)N[C@H](C(=O)N1)CCS(=O)C)C(C)C)CC3=CNC4=CC=CC=C43)CC5=CC=CC=C5)CC6=CC=CC=C6)CCS(=O)C
CC[C@H](C)[C@H]1C(=O)N[C@H](C(=O)N[C@H](C(=O)N[C@H](C(=O)N2CCC[C@H]2C(=O)N[C@H](C(=O)N[C@H](C(=O)N[C@H](C(=O)N1)CC3=CNC4=CC=CC=C43)CC5=CC=CC=C5)CC6=CC=CC=C6)CCS(=O)C)CC(C)C)CCS(=O)C
CC[C@H](C)[C@H]1C(=O)N[C@H](C(=O)N[C@H](C(=O)N[C@H](C(=O)N2CCC[C@H]2C(=O)N[C@H](C(=O)N[C@H](C(=O)N[C@H](C(=O)N1)CC3=CNC4=CC=CC=C43)CC5=CC=CC=C5)CC6=CC=CC=C6)CCSC)CC(C)C)CCS(=O)C
CC(C)C[C@H]1C(=O)N[C@H](C(=O)N2CCC[C@H]2C(=O)N[C@H](C(=O)N[C@H](C(=O)N[C@H](C(=O)N[C@H](C(=O)N[C@H](C(=O)N1)CCSC)C(C)C)CC3=CNC4=CC=CC=C43)CC5=CC=CC=C5)CC6=CC=CC=C6)CC[S@@](=O)C
CC1=C2C(=C3C(=C1)C4=CC=CC=C4N3)C5CC(O2)(CCC5C(=C)C)C
CC(=CC1C2=C(C3=C(O1)C=C(C=C3)O)OC4=C5C=CC(OC5=CC(=C4C2=O)O)(C)C)C
CC(=CCC1=C(C=C(C2=C1OC3=C(C2=O)C(OC4=C3C=CC(=C4)O)C=C(C)C)O)O)C
C[C@H]1[C@@H](CC[C@@]1(C)O)[C@@](C)(CCC=C(C)C)O
COC1=C(C=C2C(C(C(CC2=C1)(CO)O)CO)C3=CC(=C(C=C3)O)OC)O
CC1CC2C(C(C3(O2)CCC4C5CC=C6CC(CCC6(C5CC4=C3C)C)O)C)NC1
C[C@@H]1CC[C@]2([C@@]13C[C@@]4([C@]([C@@]2(COC([C@@H]3O)O4)C)(C)O)O)O
C1CCCC/C=C/CCCC(=O)CCCC1
CC(C)CC(=O)C1=C2C(=CC(=C1)C(=O)C)C=CC(O2)(C)C
C[C@@H]([C@H]1CC[C@@]2([C@@]1(CC[C@]34[C@H]2CC[C@@H]5[C@]3(C4)CC[C@@H](C5(C)C)NC)C)C)N(C)C
C1CC[C@@H]2[C@H](C1)C=C[C@@H]([C@H]2C(=O)N3CCCC3)C4=CC5=C(C=C4)OCO5
C1CCCCCCC(=O)CCCCCC1
C1CCCCC(=O)CCC/C=C\CCC1
CC(C1C(CC2(C1(CCC34C2C=CC5C3(C4)CCC(C5(C)C)N(C)C)C)C)O)N(C)C
CC([C@H]1[C@@H](C[C@@]2([C@@]1(CC[C@]34[C@H]2CC[C@@H]5[C@]3(C4)CC[C@H](C5(C)C)NC)C)C)O)NC
CC(C)C1=CC(=CC2=C1CCC2(C)O)C(=O)C
CC(C)C1CC[C@@H]2C1(CC[C@]3(C2(CC=C4C3CCC5[C@@]4(CC[C@@H](C5(C)C)OC)C)C)C)C
C[C@@H]1[C@H]([C@H](CC(O1)O[C@H]2CC[C@@]3([C@H]4CC[C@@]5([C@H](CC[C@@]5([C@H]4CC[C@@]3(C2)O)O)C6=CC(=O)OC6)C)C=O)OC)O
C[C@@H]1[C@@H]([C@H](C[C@@H](O1)O[C@H]2CC[C@@]3(C4CCC5(C(CCC5(C4CCC3(C2)O)O)C6=CC(=O)OC6)C)CO)OC)O
C[C@H]1[C@@H]([C@@H](CC(O1)O)OC)O
CC1=CC=C(C=C1)C(C)C
C[C@@H]1[C@@H]([C@@H](C[C@@H](O1)O[C@H]2CC[C@@]3(C4C[C@H]([C@@]5([C@H](CC[C@@]5([C@@]4(CC=C3C2)O)O)O)CC(=O)C)OC(=O)/C=C(\C)/C(C)C)C)OC)O[C@H]6C[C@H]([C@H]([C@H](O6)C)O[C@H]7C[C@H]([C@H]([C@H](O7)C)O[C@H]8[C@@H]([C@H]([C@@H]([C@H](O8)CO)O)O)O)OC)OC
C[C@@H]1[C@@H]([C@@H](C[C@@H](O1)O[C@H]2[C@H](O[C@H](C[C@H]2OC)O[C@H]3CC[C@@]4(C5C[C@H]([C@@]6([C@H](CC[C@@]6([C@@]5(CC=C4C3)O)O)O)CC(=O)C)OC(=O)/C=C(\C)/C(C)C)C)C)O)O[C@H]7C[C@H]([C@H]([C@H](O7)C)O[C@H]8[C@@H]([C@H]([C@@H]([C@H](O8)CO)O)O)O)OC
CCCCCC(=O)OC1CCC2(C3CCC4C5C(CCC5(CCC4(C3(CCC2C1(C)C)C)C)C)CC)C
C1C(C(C(CC1(C(=O)O)OC(=O)/C=C/C2=CC(=C(C=C2)O)O)O)OC(=O)/C=C\C3=CC(=C(C=C3)O)O)O
C=C1C[C@@H](C2[C@@H]([C@@H]3[C@H]1CC(C3=C)O)OC(=O)C2=C)OC(=O)C(=C)CO
CC1=COC2=C1C(=O)C3=C(C2=O)OC(=C3)C(=C)C
C[C@@H]1CC[C@@H]2CC3=C(CC[C@]13C2(C)C)C
CC1=C2C[C@@H](CC[C@]2(CC[C@H]1O)C)C(=C)C
CC(=C)[C@@H]1CC[C@]2(CC[C@@H]([C@]2(C1)C(=O)C)O)C
COC1=CC(=O)C2=C(C1=O)C=CC3=C2C=CC(=C3OC)O
CC1=C(C2=C(C(=C1O)C)OC(CC2=O)C3=CC(=C(C=C3)O)O)O
COC1=C(C2=C(C=C1)OC(=C(C2=O)OC)C3=CC(=C(C=C3)O[C@H]4[C@@H]([C@H]([C@H]([C@H](O4)CO)O)O)O)OC)O
C(CSC[C@@H](C(=O)[O-])[NH3+])[C@@H](C(=O)[O-])[NH3+]
C1[C@H]2CNCC1CN3C2=CC=CC3=O
CC/C(=C\C[C@@H]1[C@@H](C[C@@H]([C@@H](O1)C/C=C/C#C)Cl)Br)/Br
C1=CC(=CC=C1C2=COC3=C(C2=O)C=[13CH][13C](=[13CH]3)O)O
C1=CC(=CC=C1C2=COC3=C(C2=O)C=CC(=C3)O[C@H]4C([C@H]([C@@H](C(O4)CO)O)O)O)O
COC1=CC(=O)C(=CC1=O)[C@@H](C=C)C2=CC=CC=C2
COC1=C(C=C2C(=CCOC2=C1)C3=CC=CC=C3)O
COC1=C(C=C2C(=CC(=O)OC2=C1)C3=CC=CC=C3)O
COC1=CC(=C(C=C1C(C=C)C2=CC=CC=C2)O)OC
C/C=C/C=C(\C)/C(=O)O[C@@H]1C2=CC(=O)[C@](C(=O)C2=CO[C@]13[C@@H](CC[C@@H](O3)C)O)(C)OC(=O)C
CNC1=C(C=CC=C1OC)C(=O)OC
CO[C@@H]1[C@H](C([C@@H]([C@@H](C1O)OC)O)O)O
COC1=C2C(=CC(=C1C=O)O)C(=O)C3=CC=CC=C3C2=O
COC1=C2C(=CC(=C1CO)O)C(=O)C3=CC=CC=C3C2=O
CC1CCC2C(C3(C1CCC3=O)C)OC(=O)C2=C
C1=CO[C@H]([C@H]2[C@@]1([C@@H](C=C2CO)O)O)O[C@H]3[C@@H]([C@H]([C@@H]([C@H](O3)CO)O)O)O
C[C@H]1COC2=C1C(=O)[C@](C3=C2C=CC4=C3C=CC=C4C)(CC(=O)C)O
C[C@H]1COC2=C1C(=O)[C@@](C3=C2C=CC4=C3CCCC4(C)C)(CC(=O)C)O
C1=CC(=C(C=C1C[C@H](C(=O)O)O)O)O
CC1=CC=CC2=C1C=CC3=C2C(=O)C(=O)C(=C3O)C(C)CO
CC1COC2=C(C1(C)CO)C(=O)C3=C(C2=O)C4=C(C=C3)C(=CC=C4)C
COC1=C(C=C(C=C1)[C@@H]2[C@H]([C@H](CO2)CC3=CC(=C(C=C3)O)OC)CO)OC
C1=CC=C(C=C1)CCC(CC(=O)C2=CC=C(C=C2)O)O
COC1=CC(=CC(=C1O)OC)[C@@H]2[C@H](OC3=C(O2)C=CC4=C3OC(=O)C=C4)CO
C1=CC2=C(C(=C1)O)OC(=O)C=C2O
C1=CC(=C(C2=C1C=CC(=O)O2)O[C@H]3[C@@H]([C@H]([C@@H]([C@H](O3)CO)O)O)O)O
CC1C[C@]2(C3C4C1(C5C=C(C(=O)[C@]5([C@@H]([C@@]6([C@H]4O6)CO)O)O)C)O[C@@](O3)(O2)C7=CC=CC=C7)C(=C)C
C1=CC(=C(C2=C1C=CC(=O)O2)O)OC3[C@@H]([C@H]([C@@H]([C@H](O3)CO)O)O)O
C1[C@@H]([C@H](OC2=C3C(=CC(=C21)O)OC(=C3C(=O)C4=C(C=C(C=C4O)O)O)C5=CC=C(C=C5)O)C6=CC=C(C=C6)O)O
COC1=C(C=C2C(=C1)C=C(C(=O)O2)OC3=CC4=C(C=C3)C=CC(=O)O4)O
C[C@@]1(CC[C@@H]2C(=C1)CC[C@H]3[C@]2(CC[C@H](C3(C)C)O)C)[C@H](CO)O
C[C@@]1(CC[C@@H]2C(=C1)CC[C@H]3[C@]2(CC[C@H](C3(C)C)O)C)[C@H](CO[C@H]4[C@@H]([C@H]([C@@H]([C@H](O4)CO)O)O)O)O
C[C@]12CCC3C(C1CCC2[C@@H]4CO[C@]5(C[C@@H]4OC(=O)C5COC)C)CC=C6[C@@]3(C(=O)C=CC6)C
CN1C2CCC1CC(C2)OC(=O)C3=CC=C(C=C3)OC
CC1=C(C(=O)OC(C1)[C@@H](C)C2CCC3[C@@]2(CCC4C3CC=C5[C@@]4(C(=O)C=CC5)C)C)CO[C@H]6[C@@H]([C@H]([C@H]([C@H](O6)CO)O)O)O
CC1=C(C(=O)OC(C1)[C@@H](CO)C2CCC3[C@@]2(CCC4C3CC=C5[C@@]4(C(=O)C=CC5)C)C)CO[C@@H]6[C@@H]([C@H]([C@H]([C@H](O6)CO)O)O)O
CC1=C(C(=O)O[C@H](C1)[C@@H](CO)[C@H]2CC[C@@H]3[C@@]2(CC[C@H]4[C@H]3CC=C5[C@@]4(C(=O)C=CC5)C)C)COC
CC1=C(C(=O)OC(C1)C(CO)C2CCC3[C@@]2(CCC4C3CC=C5[C@@]4(C(=O)CC(C5)S(=O)(=O)O)C)C)COC
C[C@]12CCC3C(C1CCC2C4COC5(CC4OC(=O)C5=O)C)CC=C6[C@@]3(C(=O)CC(C6)S(=O)(=O)O)C
CC(=O)O[C@@H]1[C@H]([C@@H](O[C@@H]([C@H]1OC(=O)C)OC(=O)C)OCC2C(=O)OC3CC2(OCC3C4CCC5C4(CCC6C5CC=C7C6(C(=O)C=CC7)C)C)C)OC(=O)C
C[C@]12CCC3C(C1CCC2C4CO[C@]5(C[C@@H]4OC(=O)C5CO)C)CC=C6[C@@]3(C(=O)C=CC6)C
CC1=CCC2(CCC(=C2CC1)C(C)C)C
CC(C)[C@H]1CC[C@]2(C13CC[C@](O3)([C@H](C2)O)C)C
CC[C@H](CC[C@@H](C)C1CC[C@@H]2[C@@]1(CC[C@H]3[C@H]2CC=C4[C@@]3(CC[C@@H](C4)OC5[C@@H]([C@H]([C@@H]([C@H](O5)CO)O)O)O)C)C)C(C)C
CC1=CC2=C(C=C[C@@](O2)(C)CC/C=C(\C)/CCC(C(=C)C)O)C(=C1)O
CC1=CC2=C(C=C[C@@](O2)(C)CCC(C(=C)CCC=C(C)C)O)C(=C1)O
CC1=CC2=C(C=C[C@@](O2)(C)CC/C=C(\C)/C/C=C\C(C)(C)O)C(=C1)O
CC1=CC2=C(C=C[C@@](O2)(C)CC/C=C(\C)/CC/C=C(\C)/CO)C(=C1)O
CN1CCC2=CC(=C(C=C2[C@H]1CC3=CC(=C(C=C3)O)OC4=CC=C(C=C4)CC5C6=CC(=C(C=C6CCN5C)OC)OC)OC)OC
CN1CCC2=CC(=C(C=C2[C@H]1CC3=CC=C(C=C3)OC4=C(C=CC(=C4)CC5C6=CC(=C(C=C6CCN5C)O)OC)O)OC)OC
CN1CCC2=CC(=C(C=C2[C@H]1CC3=CC=C(C=C3)OC4=C(C=CC(=C4)CC5C6=CC(=C(C=C6CCN5C)O)OC)O)OC)O
CN1CCC2=CC(=C(C=C2[C@H]1CC3=CC=C(C=C3)OC4=C(C=CC(=C4)CC5C6=CC(=C(C=C6CCN5C)OC)OC)O)OC)O
COC1=CC2=C(C=C1)C3=NC=CC4=CC(=C(C(=C43)C2=O)NCCC5=CC=C(C=C5)O)OC
COC1=CC2=C(C=C1)C3=NC=CC4=C3C(=C(C(=C4OC)OC)N)C2=O
CN1CCC2=CC(=C(C=C2[C@H]1CC3=CC=C(C=C3)OC4=C(C=CC(=C4)CC5C6=CC(=C(C=C6CCN5C)OC)O)O)OC)OC
[truncated: 10,018 more rows]
